# Supplementary material for: Comparison of efficacy and safety between electroacupuncture at ‘four sacral points’ and conventional electroacupuncture for the treatment of urinary incontinence after stroke: study protocol for a randomised controlled trial
Source: PubMed Central journal article supplement — BMJ Open. 2018 Nov 5;8(11):e021783. doi: 10.1136/bmjopen-2018-021783 (PMC6231555; doi:10.1136/bmjopen-2018-021783), 2018-11-05
Supplement: bmjopen-2018-021783.draft_revisions.pdf [file bmjopen-2018-021783.draft_revisions.pdf]

# BMJ Open

BMJ Open is committed to open peer review. As part of this commitment we make the peer review history of every article we publish publicly available.

When an article is published we post the peer reviewers' comments and the authors' responses online. We also post the versions of the paper that were used during peer review. These are the versions that the peer review comments apply to.

The versions of the paper that follow are the versions that were submitted during the peer review process. They are not the versions of record or the final published versions. They should not be cited or distributed as the published version of this manuscript.

BMJ Open is an open access journal and the full, final, typeset and author-corrected version of record of the manuscript is available on our site with no access controls, subscription charges or pay-per-view fees (<http://bmjopen.bmj.com>).

If you have any questions on BMJ Open's open peer review process please email [info.bmjopen@bmj.com](mailto:info.bmjopen@bmj.com)

# BMJ Open

## Comparison of efficacy and safety between electroacupuncture at 'four sacral points' and conventional electroacupuncture for the treatment of urinary incontinence after stroke: study protocol for a randomized controlled trial

|                               |                                                                                                                                                                                                                                                                                                                                                                                                                                                                                                                                                                                                                                                                                                                                     |
|-------------------------------|-------------------------------------------------------------------------------------------------------------------------------------------------------------------------------------------------------------------------------------------------------------------------------------------------------------------------------------------------------------------------------------------------------------------------------------------------------------------------------------------------------------------------------------------------------------------------------------------------------------------------------------------------------------------------------------------------------------------------------------|
| Journal:                      | <i>BMJ Open</i>                                                                                                                                                                                                                                                                                                                                                                                                                                                                                                                                                                                                                                                                                                                     |
| Manuscript ID                 | bmjopen-2018-021783                                                                                                                                                                                                                                                                                                                                                                                                                                                                                                                                                                                                                                                                                                                 |
| Article Type:                 | Protocol                                                                                                                                                                                                                                                                                                                                                                                                                                                                                                                                                                                                                                                                                                                            |
| Date Submitted by the Author: | 22-Jan-2018                                                                                                                                                                                                                                                                                                                                                                                                                                                                                                                                                                                                                                                                                                                         |
| Complete List of Authors:     | Chen, Shan; the First Affiliated Hospital of Zhejiang Chinese Medical University, Department of Acupuncture and Moxibustion<br>Wang, Siyou; Clinical Research Section, Shanghai Research Institute of Acupuncture and Meridian<br>Xuan, Li; 3, Department of Acupuncture and Moxibustion<br>Lu, Hanti; the First Affiliated Hospital of Zhejiang Chinese Medical University, Clinical Evaluation and Analysis Center<br>Hu, Zhikai; Huaqiao University, Department of Computer Science<br>Zhang, Chao; the First Affiliated Hospital of Zhejiang Chinese Medical University, Rehabilitation Unit<br>Zhang, Huifang; the First Affiliated Hospital of Zhejiang Chinese Medical University, Department of Acupuncture and Moxibustion |
| Keywords:                     | COMPLEMENTARY MEDICINE, UROLOGY, Stroke medicine < INTERNAL MEDICINE                                                                                                                                                                                                                                                                                                                                                                                                                                                                                                                                                                                                                                                                |
|                               |                                                                                                                                                                                                                                                                                                                                                                                                                                                                                                                                                                                                                                                                                                                                     |

SCHOLARONE™  
Manuscripts

1  
2  
3 **Comparison of efficacy and safety between electroacupuncture at ‘four sacral**  
4 **points’ and conventional electroacupuncture for the treatment of urinary**  
5 **incontinence after stroke: study protocol for a randomized controlled trial**  
6  
7

8 Shan Chen<sup>1</sup>, Siyou Wang<sup>2</sup>, Lihua Xuan<sup>1</sup>, Hanti Lu<sup>3</sup>, Zhikai Hu<sup>4</sup>, Chao Zhang<sup>5</sup>,  
9 Huifang Zhang<sup>1</sup>

10 Corresponding author:

11 Shan Chen

12 Department of Acupuncture and Moxibustion, the First Affiliated Hospital of  
13 Zhejiang Chinese Medical University, Hangzhou, China

14 No.9 the Ninth Street, Xiasha Economic and Technological Zone, Hangzhou,  
15 Zhejiang Province 310018, China

16 breezeilly@hotmail.com

17 Phone number: +86 152 5881 3929

18 Fax number: 0571-85860230  
19  
20  
21  
22

23  
24 Siyou Wang, Clinical Research Section, Shanghai Research Institute of Acupuncture  
25 and Meridian, Shanghai, China

26 Lihua Xuan, Department of Acupuncture and Moxibustion, the First Affiliated  
27 Hospital of Zhejiang Chinese Medical University, Hangzhou, China

28 Hanti Lu, Clinical Evaluation and Analysis Center of the First Affiliated Hospital of  
29 Zhejiang Chinese Medical University, Hangzhou, China

30 Zhikai Hu, Department of Computer Science, Huaqiao University, Xiamen, China

31 Chao Zhang, Rehabilitation Unit of the First Affiliated Hospital of Zhejiang Chinese  
32 Medical University, Hangzhou, China

33 Huifang Zhang, Department of Acupuncture and Moxibustion, the First Affiliated  
34 Hospital of Zhejiang Chinese Medical University, Hangzhou, China  
35  
36  
37  
38  
39  
40  
41  
42

43 **Keyword:** electroacupuncture; urinary incontinence; post-stroke; electrical pudendal  
44 nerve stimulation  
45

46 **Word count:** 4683  
47  
48  
49  
50  
51  
52  
53  
54  
55  
56  
57  
58  
59  
60

## ABSTRACT

### Introduction

Electroacupuncture at ‘four sacral points’, also known as electrical pudendal nerve stimulation therapy, combines the advantages of pudendal nerve neuromodulation (PNM) and the technique of deep insertion of long acupuncture needles. It has been used to treat stress urinary incontinence, female urgency-frequency syndrome, idiopathic urgency urinary incontinence, and neurological bladders in previous studies. Here we describe the protocol for a randomized controlled trial for evaluation of the efficacy and safety of electroacupuncture at ‘four sacral points’ for the management of urinary incontinence after stroke.

### Methods and Analysis

This is an open-label randomized controlled trial with blinded assessments and analyses. A total of 140 eligible patients will be randomly allocated to two groups. The treatment group (n = 70) will receive electroacupuncture at ‘four sacral points’ along with routine medical care, while the control group will receive conventional electroacupuncture along with routine medical care. Twenty treatment sessions will occur over a period of 4 weeks. The primary outcome measures will be the self-recorded findings in an incontinent episode diary and the findings of the 24-hour pad test at baseline and at 4 weeks after baseline. The secondary outcome measures will be the International Consultation on Incontinence Questionnaire Urinary Incontinence – Short Form (ICIQ-UI SF) score and the Barthel Activities of Daily Living Index (Barthel ADL Index) score at baseline and at 4 and 28 weeks after baseline.

**Ethics and dissemination:** This protocol has been approved by the Ethics Committee of the First Affiliated Hospital of Zhejiang Chinese Medical University (approval No. 2018-K-059-01). Written informed consent will be obtained from each participant. The results of the study will be published in peer-reviewed journals.

**Trial registration number:** ChiCTR-IOR-17012847

### Strengths and limitations of this study

First pilot study to evaluate the efficacy and safety of electroacupuncture at ‘four sacral points’ for the treatment of urinary incontinence after stroke.

Randomised clinical trial with pragmatic design, blinded assessment and analysis.

A novel acupuncture intervention versus conventional acupuncture for the treatment of urinary incontinence after stroke.

Lack of blinding of acupuncturists and participants due to the nature of acupuncture.

## INTRODUCTION

1  
2  
3 The International Continence Society (ICS) has defined urinary incontinence (UI) as  
4 the involuntary loss of urine <sup>[1]</sup>. In a systematic review, a random-effects  
5 meta-analysis determined the prevalence of UI after stroke to be 23.6% <sup>[2]</sup>.  
6 Post-stroke UI may develop because of various reasons, although direct  
7 stroke-induced damage to the neuromicturition pathways is considered the most  
8 common cause. Typical symptoms include the involuntary leakage of urine  
9 accompanied or immediately preceded by urgency. Urodynamic evaluation often  
10 reveals uninhibited detrusor contraction <sup>[3]</sup>. Physical consequences include skin  
11 dermatitis and urinary tract infections, while psychological consequences include  
12 embarrassment and low self-esteem <sup>[4]</sup>. In addition, UI is a powerful prognostic  
13 indicator of survival and eventual functional dependence <sup>[5]</sup>. The most recent research  
14 on this topic demonstrated a higher mortality rate for stroke patients with UI (56.8%)  
15 than for stroke patients without UI (11.9%) <sup>[6]</sup>. Therefore, the management of UI after  
16 stroke is of great importance.

17  
18  
19  
20  
21  
22  
23 Evidence-based interventions for post-stroke UI are somewhat limited, but include  
24 behavioural and pharmacological interventions, as well as individually tailored  
25 structured management plans, or the aid of continence nurse specialists, in order to  
26 promote continence <sup>[3]</sup>. Trials of behavioural and pharmacological therapies have  
27 provided insufficient evidence to guide the management of post-stroke UI in adults <sup>[7]</sup>.  
28 Furthermore, side effect profiles and anticholinergic burden should be considered  
29 before medications are prescribed <sup>[8]</sup>.

30  
31  
32  
33 Neuromodulation therapies, which involve the electrical stimulation of  
34 target-specific nerves, are reportedly effective for overactive bladder (OAB) or  
35 urgency UI (UUI) <sup>[9]</sup>. Neuromodulation includes transvaginal or transanal electrical  
36 stimulation (TES), percutaneous tibial nerve stimulation (PTNS), sacral nerve  
37 neuromodulation (SNM), and pudendal nerve (PN) neuromodulation (PNM) <sup>[10]</sup>.  
38 Although TES is an easy procedure, it is not tolerated by several patients because of  
39 discomfort, mucosal injury, and the necessity for high-intensity stimulation to achieve  
40 an acceptable outcome <sup>[11]</sup>. SNM with the InterStim device (Medtronic, Minneapolis,  
41 MN) provides continuous stimulation and close nerve contact; thus, it is different  
42 from TES. The success rate is high <sup>[12-13]</sup>; however, at least 20% of initially tested  
43 patients do not respond to the test procedure <sup>[14]</sup>. The disadvantages of SNM include  
44 the invasiveness of the procedure, the high cost of treatment, the high rate of revision  
45 surgery, the requirement for device replacement on battery exhaustion, and adverse  
46 events (pain and infection) <sup>[15-16]</sup>. PN afferents play a particularly important role in  
47 the inhibition of the voiding reflex. Because SNM only excites a portion of PN  
48 afferents, direct PN stimulation may be more effective <sup>[10]</sup>. PNM with the Interstim  
49 device or the Bion device (selective PN stimulation) can be used to treat UUI  
50 refractory to SNM <sup>[10-17-18]</sup>, although its disadvantages are similar to those of SNM

1  
2  
3 [10-18]. PTNS with needle electrodes is minimally invasive, effective, easy to perform,  
4 and well tolerated [8]; however, its effect diminishes over time [15-17].  
5

6 According to the theory of traditional Chinese medicine (TCM), UI is primarily  
7 caused by kidney qi deficiency, which often causes bladder dysfunction in terms of  
8 urine control. Accordingly, the principle of acupuncture treatment for UI is to  
9 reinforce kidney qi and promote the recovery of bladder function [19]. Acupoints on  
10 the lower abdomen, such as CV4 (Guanyuan), CV6 (Qihai), and ST28 (Shuidao), as  
11 well as those on the sacral region, such as BL32 (Ciliao), BL33 (Zhongliao), and BL  
12 35 (Huiyang), are generally selected for the reinforcement of kidney qi and regulation  
13 of the bladder voiding function [20-22]. A literature review showed that acupuncture  
14 demonstrated more favourable effects than did antimuscarinic drugs for the treatment  
15 of OAB and alleviation of symptoms in some comparative trials [23]. In addition,  
16 acupuncture reportedly improved the quality of life (QoL) and urodynamic testing  
17 parameters in patients with OAB [23-24]. In a randomized, double-blind,  
18 placebo-controlled study, electroacupuncture significantly increased the maximum  
19 cystometric capacity and bladder compliance, decreased the detrusor leak point  
20 pressure, alleviated lower urinary tract symptoms, and decreased the risk of upper  
21 urinary tract damage in patients with post-stroke detrusor overactivity [22]. However,  
22 high-quality clinical trials with appropriate inclusion criteria, sample size, control  
23 design, acupoint selection, depth of needle insertion, and efficacy and safety  
24 evaluations are necessary to properly evaluate the efficacy of acupuncture for the  
25 treatment of post-stroke UI [7, 25, 26].  
26  
27  
28  
29  
30  
31  
32  
33

34 On the basis of the theory of nerve stimulation, we developed electroacupuncture at  
35 'four sacral points' [27-28], also known as electroacupuncture neurostimulation  
36 therapy or electrical PN stimulation therapy. This approach involves the insertion of  
37 long needles at 'four sacral points,' with electricity to stimulate specific nerves under  
38 the sacral region [28-29]. When it was first developed, this treatment was used to treat  
39 stress UI (SUI) in women, and radiographic evidence with simultaneous records of  
40 perineal ultrasonographic pelvic floor muscle (PFM) contraction, vaginal pressure,  
41 and pelvic floor surface electromyography have shown that it causes PN excitation  
42 [29]. In addition, it has been used for the treatment of female urgency-frequency  
43 syndrome, idiopathic urgency UI, and UI caused by neurological or non-neurological  
44 conditions [28, 30-31]. The mechanism of action of electroacupuncture at 'four sacral  
45 points' for post-stroke UI can be explained by the modulation of reflex pathways at  
46 spinal or supraspinal levels [3]. Electrical stimulation of the afferent branches of the  
47 PN can induce strong inhibition of the micturition reflex and detrusor hyper-reflexia  
48 [10], resulting in the effective treatment of post-stroke UI [31-32].  
49  
50  
51  
52  
53  
54

55 The effectiveness of post-stroke UI treatment using alternative medicine  
56 approaches is worthy of investigation in a well-designed study. To the best of our  
57  
58  
59  
60

1  
2  
3 knowledge, no randomized controlled trials (RCT) comparing the efficacy and safety  
4 of electroacupuncture at ‘four sacral points’ with those of conventional  
5 electroacupuncture for the treatment of post-stroke UI have been conducted. Here we  
6 describe a protocol for an RCT to evaluate the efficacy and safety of  
7 electroacupuncture at ‘four sacral points’ for the management of post-stroke UI.  
8  
9

## 10 11 **METHODS AND ANALYSIS**

### 12 **Objectives**

13  
14 This is a protocol for an RCT designed to compare the efficacy and safety of  
15 electroacupuncture at ‘four sacral points’ with those of conventional  
16 electroacupuncture for the treatment of post-stroke UI.  
17

### 18 **Recruitment**

19  
20 This is a pragmatic RCT comparing electroacupuncture at ‘four sacral points’ with  
21 conventional electroacupuncture for the treatment of post-stroke UI. The research  
22 structure is shown in Figure 1. A total of 140 eligible participants will be recruited  
23 from the inpatient and outpatient departments of the First Affiliated Hospital of  
24 Zhejiang Chinese Medical University according to the inclusion and exclusion criteria.  
25 At the beginning of recruitment, detailed information about the study, including the  
26 research objective, study procedure, and potential benefits and risks, will be provided  
27 to all eligible patients. If the patient agrees to participate, he or she will be asked  
28 to sign a written informed consent form. This will be followed by baseline assessment  
29 and randomization. A treatment period of 4 weeks and a follow-up period of 24 weeks  
30 will follow the recruitment procedure.  
31  
32  
33  
34  
35

### 36 **Design**

#### 37 **Randomization and allocation concealment**

38  
39 The randomization scheme has been created by the Clinical Evaluation and Analysis  
40 Center of The First Affiliated Hospital of Zhejiang Chinese Medical University, where  
41 professionals used SPSS Statistics 22.0 to generate a random allocation sequence  
42 using a computer. Professionals involved in allocation will not be recruited in the  
43 study. The random allocation is strictly kept in an opaque envelope and is inaccessible  
44 to other research staff. After baseline assessment, the envelope will be opened by an  
45 independent staff member in the participant’s presence, in order to determine the  
46 group assignment for that participant.  
47  
48  
49  
50

#### 51 **Blinding**

52  
53 Considering the nature of acupuncture, therapists and participants cannot be blinded  
54 to the treatment allocation. Data managers and statisticians will be blinded throughout  
55 the trial. Telephone interviewers who collect follow-up information will also be  
56 blinded. Data managers, statisticians, and telephone interviewers are restricted from  
57  
58  
59

1  
2  
3 discussing the treatment allocations with each other. The therapists will not be  
4 permitted to communicate with any data managers, statisticians, or telephone  
5 interviewers. If an unblinding event occurs among data managers, statisticians, or  
6 telephone interviewers, the relevant work will be transferred to other appropriately  
7 blinded data managers, statisticians, or telephone interviewers.  
8  
9

## 10 11 **Participants**

### 12 **Sample size**

13  
14 With reference to a similar study with 120 women (efficacy rate, 70.1%:45%), the  
15 sample size has been calculated, using PASS 11 software, as 120 patients for a power  
16 (1-beta) of 0.80, an alpha (significance level) of 0.05, and a ratio of 1:1. With  
17 consideration of the estimated dropout rate (15%), the total sample size will be 140  
18 (70 in each group).  
19

### 20 **Inclusion criteria**

- 21 1. Male or female patients aged 30–85 years
- 22 2. Diagnosis of post-stroke UI in accordance with the criteria of the American Stroke  
23 Association [33] and the International Continence Society [34]
- 24 3. Inpatients or outpatients with a post-stroke interval of 4 weeks to 2 years
- 25 4. Stable vital signs, normal consciousness, and compliance with treatment
- 26 5. Refractoriness to medications (antimuscarinic agents)
- 27 6. Provision of written informed consent

### 28 **Exclusion criteria**

- 29 1. UI caused by other diseases such as Parkinson's disease, multiple sclerosis, spinal  
30 injury, or Alzheimer's disease
- 31 2. SUI or mixed UI
- 32 3. Urinary retention concomitant with UI
- 33 4. Urethral injury, lower urinary tract obstruction, refractory urinary tract infection,  
34 hydronephrosis, urological calculi, or tumours
- 35 5. Severe cognitive impairment, as defined by a Mini-Mental State Examination  
36 (MMSE) score of <22 [35]
- 37 6. Insufficiency of the heart, lungs, liver, and/or kidneys
- 38 7. Presence of an implantable electronic device

### 39 **Elimination criteria**

- 40 1. Inclusion despite non-fulfillment of the inclusion criteria
- 41 2. Lack of exclusion despite fulfilment of the exclusion criteria
- 42 3. Eligible participants who receive no interventions

### 43 **Dropout criteria**

- 44 1. Poor participant compliance
- 45 2. Serious adverse events (SAE), complications, or special physiological changes



necessitating discontinuation of the intervention

### 3. Voluntary dropout

#### **Intervention**

All participants will receive routine medical care for stroke recovery, including the control of blood pressure, blood sugar, and blood lipids and routine rehabilitation training. All of the study-related treatments will be provided by skilled acupuncturists who will strictly follow the detailed procedures for each group.

#### **Standard operating procedure**

##### 1. Needle requirements

Disposable sterile acupuncture needles in accordance with national standards within the validity period will be used.

##### 2. Hand hygiene of the operator

The operator is required to sterilize his or her hands with a sanitizer before the acupuncture procedure.

##### 3. Sterilization of the acupuncture points

Within a 5-cm diameter with the acupoint as the centre, sterilize the skin over the acupoints using a cotton swab dipped in 0.45%–0.55% povidone iodine or 75% ethanol.

##### 4. Procedure

Treatment group: Participants in this group will receive electroacupuncture at ‘four sacral points’.

###### a. Selection of points: Four sacral points (Figure 2 and Figure 3) are selected.

The two upper points are located on either side of the sacrococcygeal joint, approximately 1 cm from the joint. The two lower points are located on either side of the tip of the coccyx, approximately 1 cm from the coccyx. Acupuncture will be performed at LI15 (Jiangyu), LI11 (Quchi), LI10 (Shousanli), SJ5 (Waiguan), and LI4 (Hegu) for participants with upper limb paralysis. For participants with lower limb paralysis, ST31 (Biguan), ST34 (Liangqiu), SP10 (Xuehai), SP9 (Yinlingquan), GB39 (Xuanzhong), GB40 (Qiuxu), and LR3 (Taichong) will also be used. GB20 (Fengchi), SJ17 (Yifeng), and GB12 (Wangu) will be used for participants with dysphagia, with the additional use of ST4 (Dicang), ST6 (Jiache), and LI20 (Yingxiang) for participants with facial paralysis and drooling.

###### b. Detailed procedure: At the upper sacral points, a needle (Suzhou Shenlong Medical Apparatus Factory, Suzhou, China) measuring 0.40 × 100 mm will be inserted perpendicularly to a depth of 80–90 mm to induce a sensation referred to the urethra or anus via stimulation of the main trunk of the PN. At the lower sacral points, a needle measuring 0.40 × 100 or 0.40 × 125 mm will

1  
2  
3 be inserted obliquely toward the ischiorectal fossa to a depth of 90–110 mm  
4 to induce a sensation referred to the urethra via stimulation of the perineal  
5 nerve (Figure 4 and Figure 5). Once the sensation is induced in the respective  
6 regions, two pairs of electrodes from the G6805-A electroacupuncture device  
7 (Shantou Medical equipment factory, Shantou, China) will be connected to  
8 the two ipsilaterally inserted needles, with the anode connected to the upper  
9 needle and the cathode connected to the lower needle. The device will be set  
10 to produce electrical stimulation (biphasic 2-ms pulse duration) at a frequency  
11 of 2.0 Hz and a moderate intensity of 25–35 mA. Electrostimulation will be  
12 performed for 20 min during each treatment. PFM contraction around the  
13 urethra (often comfortable) must be maintained during the entire  
14 electrostimulation procedure. Conventional acupuncture without electricity  
15 will be applied for 20 min at the remaining acupoints.  
16  
17  
18  
19  
20  
21

22  
23 Control group: Participants in this group will receive conventional  
24 electroacupuncture.

25 a. Selection of points: Abdominal points CV6 (Qihai), CV4 (Guanyuan), and  
26 ST28 (Shuidao, both sides), corresponding to the conventional  
27 electroacupuncture treatment of UI. The point selection procedure for participants  
28 with upper or lower limb paralysis, facial paralysis, and/or dysphagia will be the  
29 same as that used for the treatment group.  
30

31 b. Detailed procedure: At CV6 (Qihai), CV4 (Guanyuan), and ST28 (Shuidao),  
32 a needle measuring 0.25 × 40 mm will be inserted perpendicularly to a depth of  
33 25–40 mm to induce a local sensation (distention or sourness). Subsequently, the  
34 electrodes from the G6805-A electroacupuncture device will be connected to the  
35 needles at these points. The device will be set to produce electrical stimulation  
36 (biphasic 2-ms pulse duration) at a frequency of 2.0 Hz and a moderate intensity  
37 that is tolerable by the participants. Electrostimulation will be performed for 20  
38 min during each treatment. Conventional acupuncture without electricity will be  
39 applied for 20 min at the remaining acupoints.  
40  
41  
42  
43  
44

- 45 5. Treatment period: All participants will receive treatment every day from Monday  
46 to Friday. One course of treatment will comprise 10 sessions. The therapeutic  
47 effects will be evaluated after the completion of two treatment courses (4 weeks).  
48  
49

## 50 Outcome measures

### 51 Primary outcome measures

- 52 1. The incontinent episode diary

53 The incontinent episode diary (table 1) will be used to derive the primary outcome  
54 measure. The number of incontinent episodes will be recorded by the participants  
55  
56  
57  
58  
59  
60

over a period of 3 days at baseline. A template will be provided for patient use. This data will be recorded again at the end of treatment.

Table 1 The incontinent episode diary

| Name                                                                     |  |       |  |       | Date |
|--------------------------------------------------------------------------|--|-------|--|-------|------|
| Record every accidental loss of urine over 3 consecutive days with an X. |  |       |  |       |      |
| Start at baseline and continue recording for 3 days                      |  |       |  |       |      |
| Day 1                                                                    |  | Day 2 |  | Day 3 |      |
| eg X                                                                     |  |       |  |       |      |
|                                                                          |  |       |  |       |      |
|                                                                          |  |       |  |       |      |
|                                                                          |  |       |  |       |      |
|                                                                          |  |       |  |       |      |

## 2. 24-hour pad test

The 24-hour pad test findings will be used as the other primary outcome measure. This test quantitatively assesses the amount of urine leakage for an individual with UI. At baseline and at the end of treatment, wet pads will be collected by the patient over a 24-hour period and stored in an airtight plastic bag. The equivalent number of dry pads will be placed in a similar plastic bag. Each bag will be weighed by the patient or brought into the clinic for weighing.

## Secondary outcome measures

1. International Consultation on Incontinence Questionnaire Urinary Incontinence – Short Form (ICIQ-UI SF)<sup>[36]</sup> (Table 2)

2. Barthel Activities of Daily Living Index (Barthel ADL Index)<sup>[37]</sup> (Table 3)

The ICIQ-UI SF is used in research and clinical practice worldwide. It is a brief and psychometrically robust patient-completed questionnaire for evaluating the frequency and severity of UI in men and women and its impact on quality of life (QoL). The ICIQ-UI SF score ranges from 0 to 21<sup>[38]</sup>. The Barthel ADL Index is a 10-item measure of activities of daily living (ADL) that is frequently used in clinical practice and as a trial outcome measure in stroke medicine<sup>[37]</sup>. It is used to assess baseline abilities to quantify functional changes, including UI, after rehabilitation in stroke patients.

The above outcome measures will be assessed at baseline and at 4 and 28 weeks after baseline.

Table 2 International Consultation on Incontinence Questionnaire Urinary Incontinence – Short Form (ICIQ-UI SF)

|                                                                                                                                                        |                                                                                                                                                       |                            |
|--------------------------------------------------------------------------------------------------------------------------------------------------------|-------------------------------------------------------------------------------------------------------------------------------------------------------|----------------------------|
| 1. Please write in your date of birth:                                                                                                                 | <input type="checkbox"/> <input type="checkbox"/> <input type="checkbox"/> <input type="checkbox"/> <input type="checkbox"/> <input type="checkbox"/> |                            |
|                                                                                                                                                        | date month year                                                                                                                                       |                            |
| 2. Are you                                                                                                                                             | Female <input type="checkbox"/> Male <input type="checkbox"/>                                                                                         |                            |
| 3. How often do you leak urine?<br>(Tick one box)                                                                                                      |                                                                                                                                                       |                            |
|                                                                                                                                                        | never                                                                                                                                                 | <input type="checkbox"/> 0 |
|                                                                                                                                                        | about once a week or less often                                                                                                                       | <input type="checkbox"/> 1 |
|                                                                                                                                                        | two or three times a week                                                                                                                             | <input type="checkbox"/> 2 |
|                                                                                                                                                        | about once a day                                                                                                                                      | <input type="checkbox"/> 3 |
|                                                                                                                                                        | several times a day                                                                                                                                   | <input type="checkbox"/> 4 |
|                                                                                                                                                        | all the time                                                                                                                                          | <input type="checkbox"/> 5 |
| 4. We would like to know how much urine you think leaks.<br>How much urine do you usually leak (whether you wear protection or not)?<br>(Tick one box) |                                                                                                                                                       |                            |
|                                                                                                                                                        | None                                                                                                                                                  | <input type="checkbox"/> 0 |
|                                                                                                                                                        | a small amount                                                                                                                                        | <input type="checkbox"/> 2 |
|                                                                                                                                                        | a moderate amount                                                                                                                                     | <input type="checkbox"/> 4 |
|                                                                                                                                                        | a large amount                                                                                                                                        | <input type="checkbox"/> 6 |
| 5. Overall, how much does leaking urine interfere with your everyday life?<br>Please ring a number between 0 (not at all) and 10 (a great deal)        |                                                                                                                                                       |                            |
|                                                                                                                                                        | 0    1    2    3    4    5    6    7    8    9    10                                                                                                  |                            |
|                                                                                                                                                        | not at all                                                                                                                                            | a great deal               |
| ICIQ score: sum scores 3+4+5                                                                                                                           | <input type="checkbox"/> <input type="checkbox"/>                                                                                                     |                            |
| 6. When does urine leak? (Please tick all that apply to you)                                                                                           |                                                                                                                                                       |                            |

1  
2  
3  
4  
5  
6  
7  
8  
9  
10  
11  
12  
13  
14  
15  
16  
17  
18  
19  
20  
21  
22  
23  
24  
25  
26  
27  
28  
29  
30  
31  
32  
33  
34  
35  
36  
37  
38  
39  
40  
41  
42  
43  
44  
45  
46  
47

|  |                                                        |                          |
|--|--------------------------------------------------------|--------------------------|
|  | never – urine does not leak                            | <input type="checkbox"/> |
|  | leaks before you can get to the toilet                 | <input type="checkbox"/> |
|  | leaks when you cough or sneeze                         | <input type="checkbox"/> |
|  | leaks when you are asleep                              | <input type="checkbox"/> |
|  | leaks when you have finished urinating and are dressed | <input type="checkbox"/> |
|  | leaks for no obvious reason                            | <input type="checkbox"/> |
|  | leaks all the time                                     | <input type="checkbox"/> |

Table 3 Barthel Activities of Daily Living Index (Barthel ADL Index)

| The Barthel Index |                                                                                                   | Patient Name |
|-------------------|---------------------------------------------------------------------------------------------------|--------------|
|                   |                                                                                                   | Rater Name   |
|                   |                                                                                                   | Date:        |
| Activity          |                                                                                                   | Score        |
| Feeding           | Unable                                                                                            | 0            |
|                   | Some help required (e.g., needs help cutting, spreading butter, etc. or requires a modified diet) | 5            |
|                   | Independent                                                                                       | 10           |
| Bathing           | Dependent                                                                                         | 0            |
|                   | Independent (or in shower)                                                                        | 5            |
| Grooming          | Needs help with personal care                                                                     | 0            |
|                   | Independent face/hair/teeth/shaving (implements provided)                                         | 5            |
| Dressing          | Dependent                                                                                         | 0            |
|                   | Needs help but can do at least half unaided                                                       | 5            |
|                   | Independent (including buttons, zips, laces, etc.)                                                | 10           |
| Bowels            | Incontinent or catheterized and unable to manage alone                                            | 0            |

|                                  |                                                                        |    |
|----------------------------------|------------------------------------------------------------------------|----|
|                                  | Occasional accident                                                    | 5  |
|                                  | Continent                                                              | 10 |
| Bladder                          | Incontinent or catheterized and unable to manage alone                 | 0  |
|                                  | Occasional accident                                                    | 5  |
|                                  | Continent                                                              | 10 |
| Toilet use                       | Dependent                                                              | 0  |
|                                  | Needs some help, but can do some things alone                          | 5  |
|                                  | Independent (can get on and off, dress and wipe unassisted)            | 10 |
| Transfer (bed to chair and back) | Unable, no sitting balance                                             | 0  |
|                                  | Major help (one or two people, physical), can sit                      | 5  |
|                                  | Minor help (verbal or physical)                                        | 10 |
|                                  | Independent                                                            | 15 |
| Mobility (on level surfaces)     | Immobile or <50 yards                                                  | 0  |
|                                  | Wheelchair independent, including corners; >50 yards                   | 5  |
|                                  | Walks with little help from one person (verbal or physical); >50 yards | 10 |
|                                  | Independent (but may use an aid; e.g., walking stick); >50 yards       | 15 |
| Stairs                           | Unable                                                                 | 0  |
|                                  | Needs help (verbal, carrying aid)                                      | 5  |
|                                  | Independent                                                            | 10 |
| Total                            |                                                                        |    |

### **Adverse events (AEs)**

An adverse event of acupuncture is defined as symptoms or diseases that are against the purpose of the treatment during or following the acupuncture treatment [39]. The research staff will record the blood pressure, heart rate, heart rhythm, and respiration rate and observe changes in the consciousness of all participants before and after the treatment. The description of AEs, time of occurrence, location of the reaction, level of severity, corresponding management, and the necessity for patient withdrawal from the trial will be recorded on the Case Report Forms (CRFs). AEs of acupuncture will be classified according to their location as local and systemic reactions.

#### **Local reactions:**

- Subcutaneous haematoma
- Minor bleeding on withdrawal of the needle
- Subcutaneous bruise
- Pain in the punctured region after treatment
- Skin allergy in the punctured region after treatment
- Local infection

#### **Systemic reactions:**

- Acupuncture fainting
- Abdominal distention
- Dizziness or vertigo
- Leg weakness
- Muscle spasm
- Systemic allergy
- Systemic infection
- Organ injury

Severe AEs are defined as symptoms or diseases that result in hospitalization or that prolong hospitalization, disability, a life-threatening situation, or even death [40]. Systemic infection and organ injury are two major AEs. Severe AEs will be reported to the Ethics Committee within 24 h. The Ethics Committee will provide medical suggestions for the research team and decide whether the patient should continue the ongoing treatment.

### **Data management, monitoring and auditing**

A research assistant will record the baseline characteristics of all participants. Trained caregivers will record the frequency of UI and conduct the 24-hour pad test at baseline and at 4 weeks after baseline. A researcher who remains blinded to treatment group allocation will collect data regarding the frequency of UI and the weight of pads from the caregivers. The participants will also complete ICIQ-UI SF and the Barthel ADL Index at baseline and at 4 weeks after baseline. A blinded telephone interviewer will interview the participants and collect data pertaining to ICIQ-UI SF and the Barthel ADL Index at 28 weeks after baseline. All data will be recorded on the CRFs. For participants who discontinue treatment early, their data will also be

1  
2  
3 collected and analysed.

4 After the completion of the CRFs, two independent researchers blinded to the group  
5 allocation will separately input data into an Excel spreadsheet. Another independent  
6 supervisor will check the two datasets for consistency. If conflicting data entries are  
7 discovered, the supervisor will compare the datasets with the original CRFs and mark  
8 the modification on the CRFs. The principal investigator of the research team will  
9 protect the electronic documents with a password and create backups of all documents.  
10 The First Affiliated Hospital of Zhejiang Chinese Medical University will be  
11 responsible for the storage and management of all data.  
12

13 The First Affiliated Hospital of Zhejiang Chinese Medical University will regularly  
14 monitor the study data and audit this study.  
15  
16

### 17 **Statistical analysis**

18 All statistical analyses will be performed by a statistician from the Clinical Evaluation  
19 and Analysis Center of The First Affiliated Hospital of Zhejiang Chinese Medical  
20 University using SPSS Statistics 22.0. Continuous variables with a normal distribution  
21 will be expressed as means  $\pm$  standard deviations (SDs). Continuous variables with a  
22 non-normal distribution or ordinal variables will be expressed as medians (with lower  
23 upper quartiles). Categorical variables will be summarized as counts and proportions.  
24 Continuous variables will be compared using Student's t-test (normal distribution) or  
25 the Wilcoxon signed rank test (abnormal distribution). Ordinal variables will be  
26 compared using the Wilcoxon signed rank test. The categorical variables will be  
27 compared using Fisher's exact test or the chi-square test. All reported P-values will be  
28 two-sided, and confidence intervals (CI) will be at the 95% level. A P-value of <0.05  
29 will be considered statistically significant.  
30  
31  
32  
33

## 34 **ETHICS AND DISSEMINATION**

### 35 **Research ethics approval**

36 The Ethics Committee of the First Affiliated Hospital of Zhejiang Chinese Medical  
37 University has reviewed and approved this protocol (approval No. 2018-K-059-01).  
38 This study will adhere to the principles of the Declaration of Helsinki. This study will  
39 be conducted at the First Affiliated Hospital of Zhejiang Chinese Medical University.  
40 Each participant will voluntarily sign written informed consent forms.  
41  
42  
43  
44

### 45 **Confidentiality**

46 All study participants will be given an identification number throughout the trial to  
47 assure confidentiality.  
48  
49

### 50 **Dissemination**

51 The results of this study will be published in open-access and peer-reviewed journals  
52 and presented at relevant conferences.  
53  
54

## 55 **DISCUSSION**

56 According to the present study protocol, in addition to electroacupuncture at 'four  
57  
58  
59  
60



1  
2  
3  
4  
5  
6  
7  
8  
9  
10  
11  
12  
13  
14  
15  
16  
17  
18  
19  
20  
21  
22  
23  
24  
25  
26  
27  
28  
29  
30  
31  
32  
33  
34  
35  
36  
37  
38  
39  
40  
41  
42  
43  
44  
45

sacral points' in the treatment group and conventional electroacupuncture in the control group, the same acupoints for other stroke symptoms will also be selected for both groups. Other stroke symptoms include unilateral limb weakness, facial paresis, dysphasia, and dysphagia [41]. In China, acupuncture has been a primary medical intervention for stroke [42]. In fact, not providing acupuncture therapy to a stroke patient is considered impractical.

Antimuscarinic agents are considered first-line drugs for neurogenic detrusor overactivity (NDO) [43]. However, because of their moderate efficacy and troublesome side effects, quite a few patients exhibit refractory disease [44]. According to the eligibility criteria, participants who are refractory to medication will be included in this RCT.

With regard to the outcome measures, the incontinent episode diary and 24-hour pad test will be used as objective measures to record the frequency of incontinence and the severity of urine loss. Patients will record their findings in the incontinent diary for only 3 days, because a longer recording period can lead to decreased patient compliance [45-46]. Research suggests that repeatability for the pad test is better with a long-term test than with a short-term test; however, longer tests (i.e., 48 and 72 hours) have lower adherence than the standard 24-hour pad test [47]. Therefore, we will perform the 24-hour pad test for good reproducibility. Moreover, in order to improve adherence, pads used in the test will be provided at no cost to the trial participants and 50 Renminbi (RMB) will be offered to caregivers collecting the pads. The ICIQ-UI SF and Barthel ADL Index will be used as subjective measures to investigate UI symptoms and QoL. The ICIQ-UI SF is a useful tool to assess UI with regard to the severity of symptoms and impact on QoL at baseline and at follow-up [48]. The Barthel ADL Index (feeding, bathing, grooming, dressing, bowels, bladder, toilet use, transfer, mobility, and stairs) is an important predictor of stroke outcomes. Studies involving stroke survivors should include ADL assessments for better management of stroke patients [37].

In summary, we have described a protocol for a pilot RCT to evaluate the efficacy and safety of electroacupuncture at 'four sacral points' for the treatment of post-stroke UI. The results of this trial should lead to a greater understanding of promising alternative options for post-stroke UI.

#### Author affiliations

46  
47  
48  
49  
50  
51  
52  
53  
54  
55  
56  
57  
58  
59  
60

<sup>1</sup>Department of Acupuncture and Moxibustion, the First Affiliated Hospital of Zhejiang Chinese Medical University, Hangzhou, China

<sup>2</sup>Clinical Research Section, Shanghai Research Institute of Acupuncture and Meridian, Shanghai, China

<sup>3</sup>Clinical Evaluation and Analysis Center of the First Affiliated Hospital of Zhejiang Chinese Medical University, Hangzhou, China

<sup>4</sup>Department of Computer Science, Huaqiao University, Xiamen, China

<sup>5</sup>Rehabilitation Unit of the First Affiliated Hospital of Zhejiang Chinese Medical University, Hangzhou, China

## Contributors

SC conceived and wrote the protocol; SYW and LHX contributed to the study design; HTL contributed to the sample size calculation and wrote the statistical analysis plan; ZKH drew the flow charts; CZ and HFZ prepared the figures and tables. All authors have read and approved the final manuscript.

## Funding Statement

This work was supported by Zhejiang Provincial Administration of Traditional Chinese Medicine (grant number 2018ZA045).

## Competing Interests Statement

None

## Ethics approval

The Ethics Committee of the First Affiliated Hospital of Zhejiang Chinese Medical University.

## Provenance and peer review

Not commissioned; externally peer reviewed.

## References

- [1] Abrams P, Andersson KE, Birder L, *et al*. Fourth International Consultation on Incontinence Recommendations of the International Scientific Committee: Evaluation and treatment of urinary incontinence, pelvic organ prolapse, and fecal incontinence. *Neurourol Urodyn* 2010;29:213-240.
- [2] Ruffion A, Castro DD, Patel H, *et al*. Systematic review of the epidemiology of urinary incontinence and detrusor overactivity among patients with neurogenic overactive bladder. *Neuroepidemiology* 2013;41:146-155.
- [3] Mehdi Z, Birns J, Bhalla A, *et al*. Post-stroke urinary incontinence. *Int J Clin Pract* 2013;67:1128-1137.
- [4] Cai W, Wang J, Wang L, *et al*. Prevalence and risk factors of urinary incontinence for post-stroke inpatients in Southern China. *Neurourol Urodyn* 2015;34:231-235.
- [5] Pizzi A, Falsini C, Martini M, *et al*. Urinary incontinence after ischemic stroke: clinical and urodynamic studies. *Neurourol Urodyn* 2014;33:420-425.
- [6] Gregor J, Steve P, Siobhan C, *et al*. Urinary incontinence and indwelling urinary catheters as predictors of death after new-onset stroke: a report of the south london stroke register. *J Stroke Cerebrovasc Dis* 2018;27:118-124.
- [7] Thomas LH, Cross S, Barrett J, *et al*. Treatment of urinary incontinence after stroke in adults. *Cochrane Database of Systematic Reviews*. 2008;23:CD004462.
- [8] Paniker JN. Urogenital symptoms in neurologic patients. *Continuum*. 2017;23:533-552.
- [9] Yamanishi T, Kaga K, Fuse M, *et al*. Neuromodulation for the treatment of lower urinary tract symptoms. *Low Urin Tract Symptoms* 2015;7:121-123.
- [10] Bosch JL. Electrical neuromodulatory therapy in female voiding dysfunction. *BJU Int* 2006;98 suppl:43-48.
- [11] van Balken MR, Vergunst H, Bemelmans BL. The use of electrical devices for the treatment of bladder dysfunction: a review of methods. *J Urol* 2004;172:846-851.
- [12] Smits MA, Oerlemans D, Marcelissen TA, *et al*. Sacral neuromodulation in patients with idiopathic overactive bladder after initial botulinum toxin therapy. *J Urol* 2013;190:2148-2152.
- [13] Siegel S, Noblett K, Mangel J, *et al*. Results of a prospective, multicenter study evaluating quality of life, safety, and efficacy of sacral neuromodulation at twelve months in subjects with symptoms of overactive bladder. *Neurourol Urodyn* 2016;34:246-251.
- [14] Spinelli M, Sievert KD. Latest technologic and surgical developments in using InterStim Therapy for sacral neuromodulation: impact on treatment success and safety. *Eur Urol* 2008;54:1287-1296.

- 1  
2  
3 [15] Hijaz A, Vasavada SP, Daneshgari F, *et al.* Complications and troubleshooting of two-stage  
4 sacral neuromodulation therapy: a single-institution experience. *Urology* 2006;68:533-537.
- 5 [16] Lee C, Pizarro-Berdichevsky J, Clifton MM, *et al.* Sacral neuromodulation implant infection:  
6 risk factors and prevention. *Curr Urol Rep* 2017;18:16.
- 7 [17] Peters KM. Alternative approaches to sacral nerve stimulation. *Int Urogynecol J*  
8 2010;21:1559-1563.
- 9 [18] Groen J, Amiel C, Bosch JL. Chronic pudendal nerve neuromodulation in women with  
10 idiopathic refractory detrusor overactivity incontinence: results of a pilot study with a novel  
11 minimally invasive implantable mini-stimulator. *Neurourol Urodyn* 2005;24:226-230.
- 12 [19] Sun Z, Yu N, Yue J, *et al.* Acupuncture for urinary incontinence after stroke: a protocol for  
13 systematic review. *BMJ Open* 2016;6:e008062.
- 14 [20] Song F, Jiang S, Zheng L, *et al.* Electroacupuncture for post-stroke urinary incontinence: a  
15 multicenter randomized controlled study. *Zhongguo Zhen Jiu* 2013;33:769-773.
- 16 [21] Paik SH, Han SR, Kwon OJ, *et al.* Acupuncture for the treatment of urinary incontinence: A  
17 review of randomized controlled trials. *Exp Ther Med* 2013;6:773-780.
- 18 [22] Liu Y, Liu L, Wang X. Electroacupuncture at points Baliao and Huiyang (BL35) for  
19 post-stroke detrusor overactivity. *Neural Regen Res.* 2013;8:1663-1672.
- 20 [23] Forde JC, Jaffe E, Stone BV, *et al.* The role of acupuncture in managing overactive bladder; a  
21 review of the literature. *Int Urogynecol J* 2016;27:1645-1651.
- 22 [24] Olivera CK, Meriwether K, El-Nashar S, *et al.* Nonantimuscarinic treatment for overactive  
23 bladder: a systematic review. *Am J Obstet Gynecol* 2016;215:34-57.
- 24 [25] Solberg M, Alræk T, Mdala I, *et al.* A pilot study on the use of acupuncture or pelvic floor  
25 muscle training for mixed urinary incontinence. *Acupunct Med* 2016;34:7-13.
- 26 [26] Liu Z, Wang Y, Xu H, *et al.* Observation on therapeutic effect of electroacupuncture for  
27 post-stroke urge incontinence. *Xin Zhong Yi* 2010;42:73-75.
- 28 [27] Wang S, Chen G, Li L. “Four sacral needles therapy” for female stress incontinence.  
29 *Shanghai J Acup Moxib* 2006;25:15-17.
- 30 [28] Lu J. Observation on therapeutic effect of electroacupuncture neurostimulation therapy for  
31 urge urinary incontinence. *Zhongguo Zhenjiu* 2012;32:691-695.
- 32 [29] Wang S, Zhang S. Simultaneous perineal ultrasound and vaginal pressure measurement prove  
33 the action of electrical pudendal nerve stimulation in treating female stress incontinence. *BJU*  
34 *International.* 2012;110:1338-1343.
- 35 [30] Wang S, Zhang S, Zhao L. Long-term efficacy of electrical pudendal nerve stimulation for  
36 urgency–frequency syndrome in women. *Int Urogynecol J* 2014;25:397-402.
- 37 [31] Wang S, LvJ, FX *et al.* Efficacy of electrical pudendal nerve stimulation versus transvaginal  
38 electrical stimulation in treating female idiopathic urgency urinary incontinence. *J Urol*  
39 2017;197:1496-1501.
- 40 [32] Wang S. Electroacupuncture pudendal nerve stimulation and its application. *J Acupunct Tuina*  
41 *Sci* 2013;11:117-121.
- 42 [33] Sacco RL, Kasner SE, Broderick JP, *et al.* An updated definition of stroke for the 21st  
43 century: a statement for healthcare professionals from the American Heart Association/American  
44 Stroke Association. *Stroke* 2013;44:2064-2089.
- 45 [34] Haylen BT, de Ridder D, Freeman RM, *et al.* Association (IUGA)/International Continence  
46 Society (ICS) joint report on the terminology for female pelvic floor dysfunction. *Neurourol*  
47 *Urody* 2010;29:4-20.
- 48 [35] Grut M, Fratiglioni L, Viitanen M, *et al.* Accuracy of the Mini-Mental Status Examination as  
49 a screening test for dementia in a Swedish elderly population. *Acta Neurol Scand*  
50 1993;87:312-317[1993-04-01].
- 51 [36] Timmermans L, Falez F, Mélot C, *et al.* Validation of use of the International Consultation on  
52 Incontinence Questionnaire-Urinary Incontinence-Short Form (ICIQ-UI-SF) for impairment rating:  
53 a transversal retrospective study of 120 patients. *Neurourol Urodyn* 2013;32:974-979.
- 54 [37] Duffy L, Gajree S, Langhorne P, *et al.* Reliability (inter-rater agreement) of the Barthel Index  
55 for assessment of stroke survivors: systematic review and meta-analysis. *Stroke* 2013;44:462-468.
- 56 [38] Hajebrahimi S, Nourizadeh D, Hamedani R, *et al.* Validity and reliability of the International  
57 Consultation on Incontinence Questionnaire-Urinary Incontinence Short Form and its correlation  
58 with urodynamic findings. *Urol J* 2012;9:685-690.
- 59 [39] Li Y, Liu Y, Zhang J, *et al.* Analysis on the situation of adverse reaction to acupuncture and  
60

1  
2  
3 acupuncture risk. *Zhongguo Zhenjiu* 2011;31:764-768.

4 [40] Zhao L, Li Y, Zhang F, *et al.* Analysis on the occurrence of laws of adverse events from 1968  
5 patients after acupuncture treatment. Symposium of seminar of the ninth national young and  
6 middle-aged acupuncture and tuina of China Acupuncture and Moxibustion Association 2010;270-276.

7 [41] Yew KS, Cheng EM. Diagnosis of Acute Stroke. *Am Fam Physician* 2015;91:528-536.

8 [42] Zhang J, Wang D, Liu M. Overview of systematic reviews and meta-analyses of acupuncture  
9 for stroke. *Neuroepidemiology* 2014;42:50-58.

10 [43] Mehnert U, Kessler TM. The management of urinary incontinence in the male neurological  
11 patient. *Curr Opin Urol* 2014;24:586-592.

12 [44] Smith AL, Wein AJ. Urinary incontinence: pharmacotherapy options. *Ann Med*  
13 2011;43:461-476.

14 [45] Robinson D, McClish DK, Wyman JF, *et al.* Comparison between urinary diaries completed  
15 with and without intensive patient instructions. *Neurourol Urodyn* 1996;15:143-148.

16 [46] Gordon D, Grpouts A. Evaluation of female lower urinary tract symptoms: overview and  
17 update. *Curr Opin Obstet Gynecol* 2001;13:521-527.

18 [47] Ferreira CHJ, Bø K. The Pad Test for urinary incontinence in women. *J Physiother*  
19 2015;61:98.

20 [48] Nyström E, Sjöström M, Stenlund H, *et al.* ICIQ symptom and quality of life instruments  
21 measure clinically relevant improvements in women with stress urinary incontinence. *Neurourol*  
22 *Urodyn* 2015;34:747.

23 Figure legends:

24 Figure 1 Study flowchart

25 Figure 2 Locations of the ‘four sacral points’ for electroacupuncture

26 Figure 3 Anatomical positions of the ‘four sacral points’ for electroacupuncture

27 Figure 4 Acupuncture at the ‘four sacral points’

28 Figure 5 Transverse computed tomography (CT) image of the coccygeal apex

29 The tip of the needle inserted at the lower sacral point is visible in the  
30 ischiorectal fossa (adjacent to the PN in Alcock’s canal)

1  
2  
3  
4  
5  
6  
7  
8  
9  
10  
11  
12  
13  
14  
15  
16  
17  
18  
19  
20  
21  
22  
23  
24  
25  
26  
27  
28  
29  
30  
31  
32  
33  
34  
35  
36  
37  
38  
39  
40  
41  
42  
43  
44  
45  
46  
47  
48  
49  
50  
51  
52  
53  
54  
55  
56  
57  
58  
59  
60

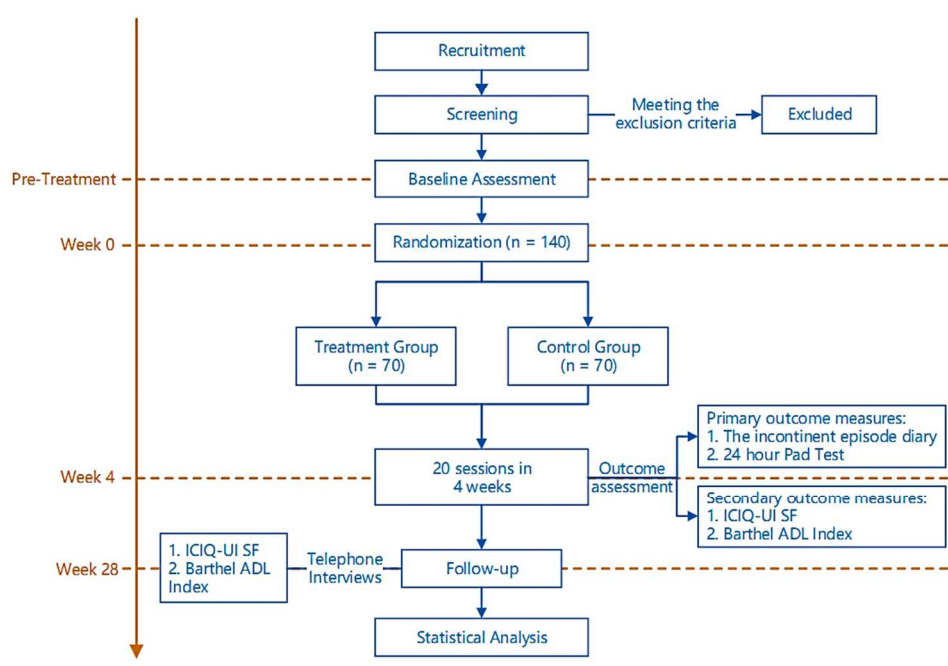

Figure 1 Study flowchart

98x70mm (300 x 300 DPI)

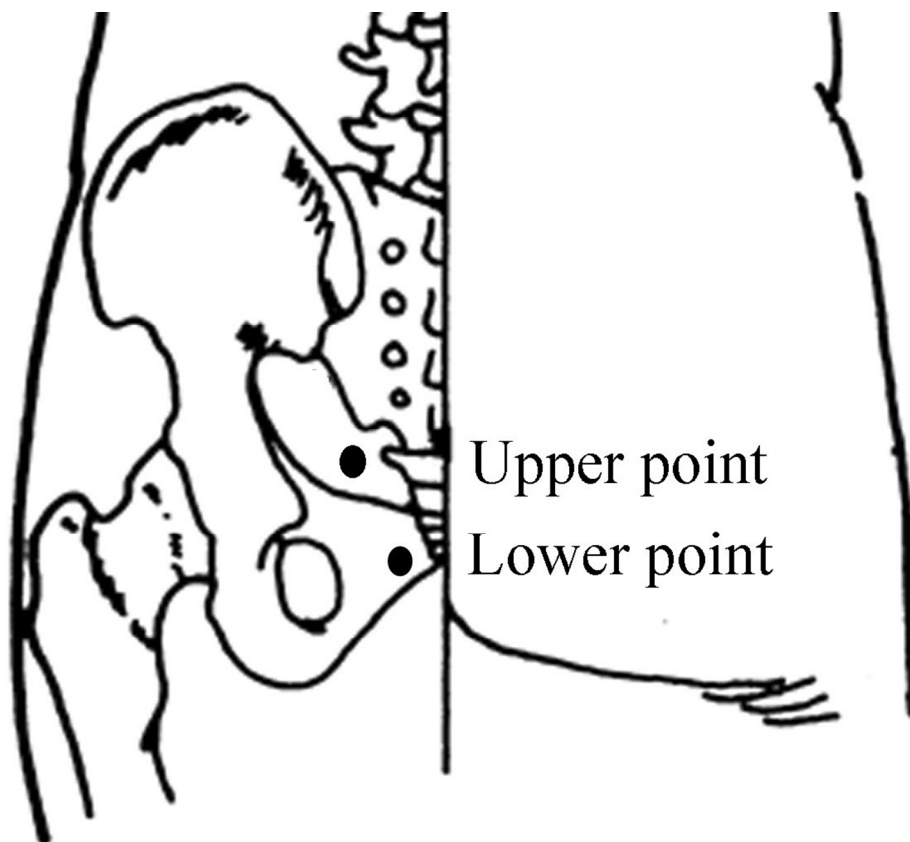

Figure 2 Locations of the 'four sacral points' for electroacupuncture

102x85mm (300 x 300 DPI)

1  
2  
3  
4  
5  
6  
7  
8  
9  
10  
11  
12  
13  
14  
15  
16  
17  
18  
19  
20  
21  
22  
23  
24  
25  
26  
27  
28  
29  
30  
31  
32  
33  
34  
35  
36  
37  
38  
39  
40  
41  
42  
43  
44  
45  
46  
47  
48  
49  
50  
51  
52  
53  
54  
55  
56  
57  
58  
59  
60

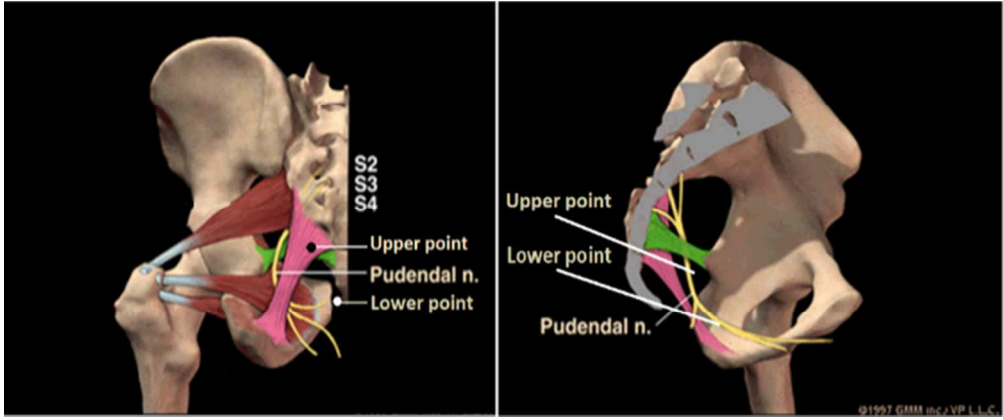

Figure 3 Anatomical positions of the 'four sacral points' for electroacupuncture

60x25mm (300 x 300 DPI)

Peer review only

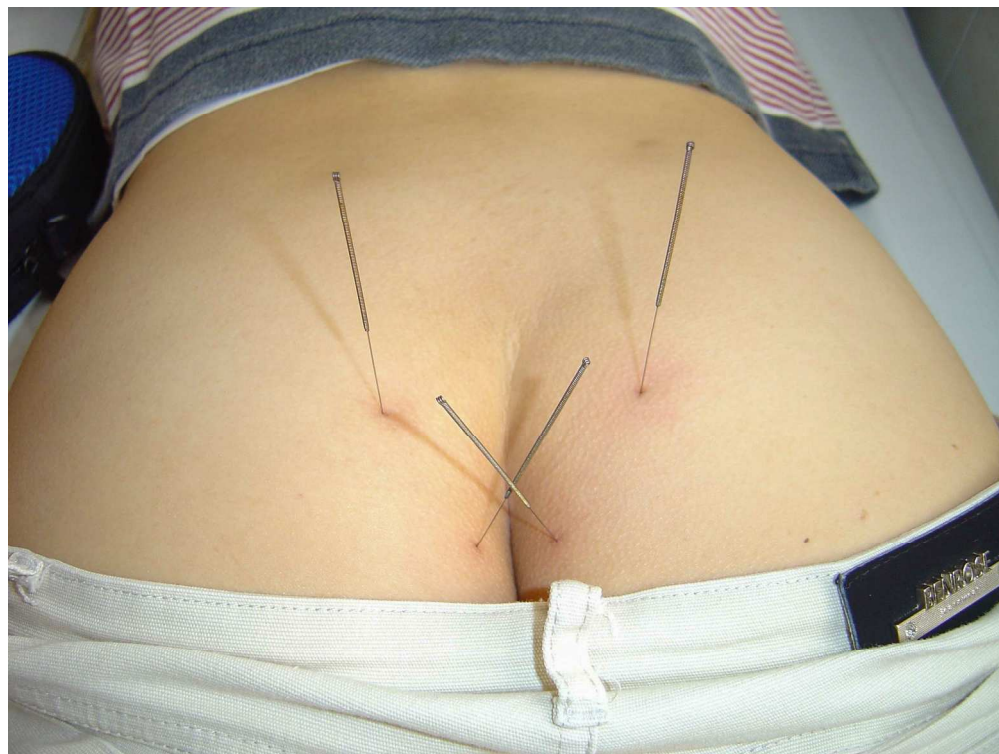

Figure 4 Acupuncture at the 'four sacral points'

219x164mm (300 x 300 DPI)



1  
2  
3  
4  
5  
6  
7  
8  
9  
10  
11  
12  
13  
14  
15  
16  
17  
18  
19  
20  
21  
22  
23  
24  
25  
26  
27  
28  
29  
30  
31  
32  
33  
34  
35  
36  
37  
38  
39  
40  
41  
42  
43  
44  
45  
46  
47  
48  
49  
50  
51  
52  
53  
54  
55  
56  
57  
58  
59  
60

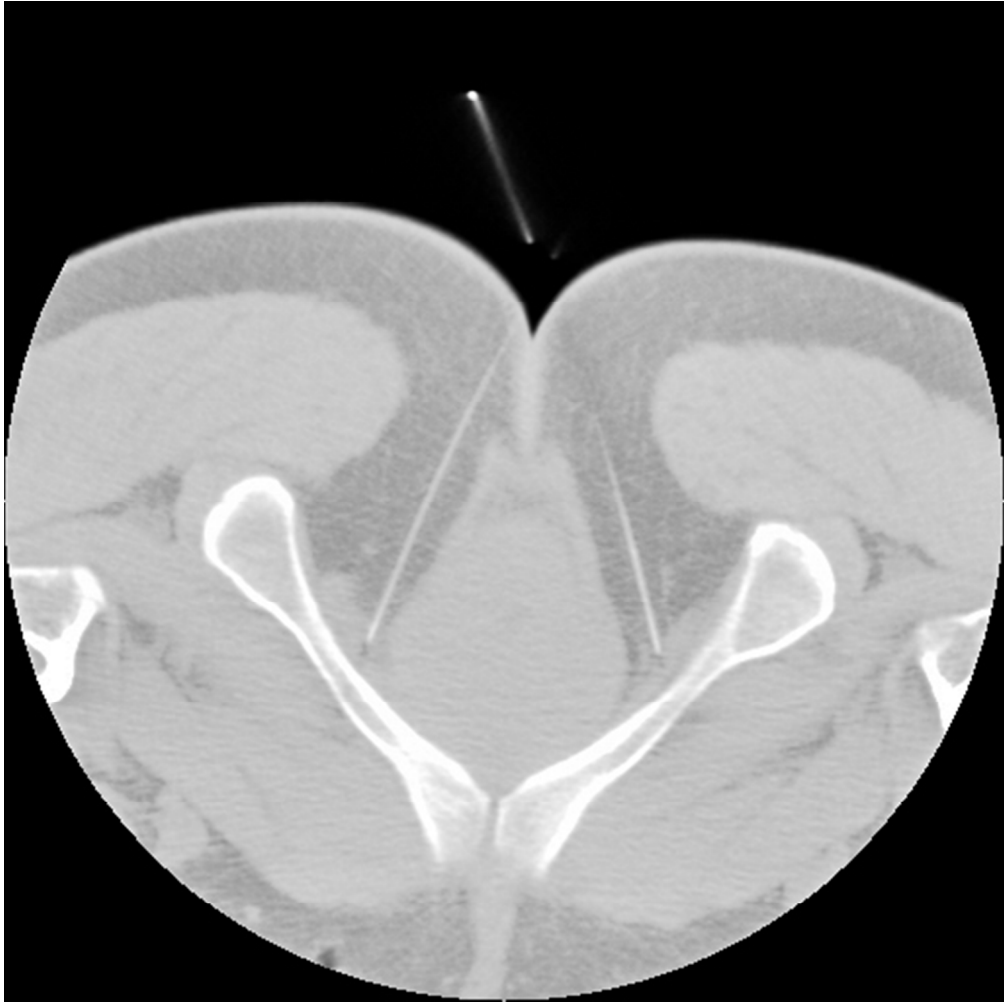

Figure 5 Transverse computed tomography (CT) image of the coccygeal apex  
The tip of the needle inserted at the lower sacral point is visible in the ischiorectal fossa (adjacent to the PN  
in Alcock's canal)

43x43mm (300 x 300 DPI)

# BMJ Open

## Comparison of efficacy and safety between electroacupuncture at 'four sacral points' and conventional electroacupuncture for the treatment of urinary incontinence after stroke: study protocol for a randomized controlled trial

|                                 |                                                                                                                                                                                                                                                                                                                                                                                                                                                                                                                                                                                                                                                                                                                                     |
|---------------------------------|-------------------------------------------------------------------------------------------------------------------------------------------------------------------------------------------------------------------------------------------------------------------------------------------------------------------------------------------------------------------------------------------------------------------------------------------------------------------------------------------------------------------------------------------------------------------------------------------------------------------------------------------------------------------------------------------------------------------------------------|
| Journal:                        | <i>BMJ Open</i>                                                                                                                                                                                                                                                                                                                                                                                                                                                                                                                                                                                                                                                                                                                     |
| Manuscript ID                   | bmjopen-2018-021783.R1                                                                                                                                                                                                                                                                                                                                                                                                                                                                                                                                                                                                                                                                                                              |
| Article Type:                   | Protocol                                                                                                                                                                                                                                                                                                                                                                                                                                                                                                                                                                                                                                                                                                                            |
| Date Submitted by the Author:   | 25-May-2018                                                                                                                                                                                                                                                                                                                                                                                                                                                                                                                                                                                                                                                                                                                         |
| Complete List of Authors:       | Chen, Shan; the First Affiliated Hospital of Zhejiang Chinese Medical University, Department of Acupuncture and Moxibustion<br>Wang, Siyou; Clinical Research Section, Shanghai Research Institute of Acupuncture and Meridian<br>Xuan, Li; 3, Department of Acupuncture and Moxibustion<br>Lu, Hanti; the First Affiliated Hospital of Zhejiang Chinese Medical University, Clinical Evaluation and Analysis Center<br>Hu, Zhikai; Huaqiao University, Department of Computer Science<br>Zhang, Chao; the First Affiliated Hospital of Zhejiang Chinese Medical University, Rehabilitation Unit<br>Zhang, Huifang; the First Affiliated Hospital of Zhejiang Chinese Medical University, Department of Acupuncture and Moxibustion |
| <b>Primary Subject Heading</b>: | Complementary medicine                                                                                                                                                                                                                                                                                                                                                                                                                                                                                                                                                                                                                                                                                                              |
| Secondary Subject Heading:      | Urology                                                                                                                                                                                                                                                                                                                                                                                                                                                                                                                                                                                                                                                                                                                             |
| Keywords:                       | COMPLEMENTARY MEDICINE, UROLOGY, Stroke medicine < INTERNAL MEDICINE, Stroke < NEUROLOGY, STROKE MEDICINE                                                                                                                                                                                                                                                                                                                                                                                                                                                                                                                                                                                                                           |
|                                 |                                                                                                                                                                                                                                                                                                                                                                                                                                                                                                                                                                                                                                                                                                                                     |

SCHOLARONE™  
Manuscripts

1  
2  
3 **Comparison of efficacy and safety between electroacupuncture at ‘four sacral**  
4 **points’ and conventional electroacupuncture for the treatment of urinary**  
5 **incontinence after stroke: study protocol for a randomized controlled trial**  
6  
7

8 Shan Chen<sup>1</sup>, Siyou Wang<sup>2</sup>, Lihua Xuan<sup>1</sup>, Hanti Lu<sup>3</sup>, Zhikai Hu<sup>4</sup>, Chao Zhang<sup>5</sup>,  
9 Huifang Zhang<sup>1</sup>

10  
11 Corresponding author:

12 Shan Chen

13  
14 Department of Acupuncture and Moxibustion, the First Affiliated Hospital of  
15 Zhejiang Chinese Medical University, Hangzhou, China

16  
17 No. 9 the Ninth Street, Xiasha Economic and Technological Zone, Hangzhou,  
18 Zhejiang Province 310018, China

19  
20 E-mail: breezehilly@hotmail.com

21  
22 Phone number: +86 152 5881 3929

23  
24 Fax number: 0571-85860230

25  
26 Siyou Wang, Clinical Research Section, Shanghai Research Institute of Acupuncture  
27 and Meridian, Shanghai, China

28  
29 Lihua Xuan, Department of Acupuncture and Moxibustion, the First Affiliated  
30 Hospital of Zhejiang Chinese Medical University, Hangzhou, China

31  
32 Hanti Lu, Clinical Evaluation and Analysis Center of the First Affiliated Hospital of  
33 Zhejiang Chinese Medical University, Hangzhou, China

34  
35 Zhikai Hu, Department of Computer Science, Huaqiao University, Xiamen, China

36  
37 Chao Zhang, Rehabilitation Unit of the First Affiliated Hospital of Zhejiang Chinese  
38 Medical University, Hangzhou, China

39  
40 Huifang Zhang, Department of Acupuncture and Moxibustion, the First Affiliated  
41 Hospital of Zhejiang Chinese Medical University, Hangzhou, China

42  
43  
44 **Keyword:** electroacupuncture; urinary incontinence; post-stroke; electrical pudendal  
45 nerve stimulation

46  
47  
48 **Word count:** 6585

## ABSTRACT

### Introduction

Electroacupuncture at ‘four sacral points’, also known as electrical pudendal nerve stimulation therapy, combines the advantages of pudendal nerve neuromodulation (PNM) and the technique of deep insertion of long acupuncture needles. It has been used to treat stress urinary incontinence, female urgency-frequency syndrome, idiopathic urgency urinary incontinence, and neurological bladders in previous studies. Here, we describe the protocol for a randomized controlled trial for evaluation of the efficacy and safety of electroacupuncture at ‘four sacral points’ for the management of urinary incontinence after stroke.

### Methods and Analysis

This is an open-label randomized controlled trial with blinded assessments and analyses. A total of 140 eligible patients will be randomly allocated to two groups. The treatment group (n = 70) will receive electroacupuncture at ‘four sacral points’ along with routine medical care, while the control group will receive conventional electroacupuncture along with routine medical care. Twenty treatment sessions will occur over a period of 4 weeks. The primary outcome measures will be the self-recorded findings in an incontinent episode diary at baseline and at 4 weeks after baseline. The secondary outcome measures will be the International Consultation on Incontinence Questionnaire Urinary Incontinence – Short Form (ICIQ-UI SF) score and the Barthel Activities of Daily Living Index (Barthel ADL Index) score at baseline and at 4 and 28 weeks after baseline.

**Ethics and dissemination:** This protocol has been approved by the Ethics Committee of the First Affiliated Hospital of Zhejiang Chinese Medical University (approval No. 2018-K-059-01). Written informed consent will be obtained from each participant. The results of the study will be published in peer-reviewed journals.

**Trial registration number:** ChiCTR-IOR-17012847

### Strengths and limitations of this study

- First pilot study to evaluate the efficacy and safety of electroacupuncture at ‘four sacral points’ for the treatment of urinary incontinence after stroke
- Randomised clinical trial with pragmatic design
- A novel acupuncture intervention for the treatment of urinary incontinence after stroke
- Lack of blinding of acupuncturists and participants due to the nature of acupuncture

## INTRODUCTION

The International Continence Society (ICS) has defined urinary incontinence (UI) as the involuntary loss of urine <sup>[1]</sup>. In a systematic review, a random-effects meta-analysis determined the prevalence of UI after stroke to be 23.6% <sup>[2]</sup>. Post-stroke UI may develop because of various reasons, although direct stroke-induced damage to the neuromicturition pathways is considered the most common cause. Typical symptoms include the involuntary leakage of urine accompanied or immediately preceded by urgency. Urodynamic evaluation often reveals uninhibited detrusor contraction <sup>[3]</sup>. Physical consequences include skin dermatitis and urinary tract infections, while psychological consequences include embarrassment and low self-esteem <sup>[4]</sup>. In addition, UI is a powerful prognostic indicator of survival and eventual functional dependence <sup>[5]</sup>. The most recent research on this topic demonstrated a higher mortality rate for stroke patients with UI (56.8%) than for stroke patients without UI (11.9%) <sup>[6]</sup>. Therefore, the management of UI after stroke is of great importance.

Evidence-based interventions for post-stroke UI are somewhat limited, but include behavioural and pharmacological interventions, as well as individually tailored structured management plans, or the aid of continence nurse specialists, in order to promote continence <sup>[3]</sup>. Trials of behavioural and pharmacological therapies have provided insufficient evidence to guide the management of post-stroke UI in adults <sup>[7]</sup>. Furthermore, side effect profiles and anticholinergic burden should be considered before medications are prescribed <sup>[8]</sup>.

Neuromodulation therapies, which involve the electrical stimulation of target-specific nerves, are reportedly effective for overactive bladder (OAB) or urgency UI (UUI) <sup>[9]</sup>. Neuromodulation includes transvaginal or transanal electrical stimulation (TES), percutaneous tibial nerve stimulation (PTNS), sacral nerve neuromodulation (SNM), and pudendal nerve (PN) neuromodulation (PNM) <sup>[10]</sup>. Although TES is an easy procedure, it is not tolerated by several patients because of discomfort, mucosal injury, and the necessity for high-intensity stimulation to achieve an acceptable outcome <sup>[11]</sup>. SNM with the InterStim device (Medtronic, Minneapolis, MN) provides continuous stimulation and close nerve contact; thus, it is different from TES. The success rate is high <sup>[12, 13]</sup>; however, at least 20% of initially tested patients do not respond to the test procedure <sup>[14]</sup>. The disadvantages of SNM include the invasiveness of the procedure, the high cost of treatment, the high rate of revision surgery, the requirement for device replacement on battery exhaustion, and adverse events (pain and infection) <sup>[15, 16]</sup>. PN afferents play a particularly important role in the inhibition of the voiding reflex. Because SNM only excites a portion of PN afferents, direct PN stimulation may be more effective <sup>[10]</sup>. PNM with the Interstim device or the Bion device (selective PN stimulation) can be used to treat UUI

1 refractory to SNM [10· 17· 18], although its disadvantages are similar to those of SNM  
2 [10· 18]. PTNS with needle electrodes is minimally invasive, effective, easy to perform,  
3 and well tolerated [8]; however, its effect diminishes over time [15· 17].  
4  
5

6 According to the theory of traditional Chinese medicine (TCM), UI is primarily  
7 caused by kidney and bladder dysfunction in terms of urine control. Accordingly, the  
8 principle of acupuncture treatment for UI is to promote the recovery of urine control  
9 [19]. Acupoints on the lower abdomen, such as CV4 (Guanyuan), CV6 (Qihai), and  
10 ST28 (Shuidao), as well as those on the sacral region, such as BL32 (Ciliao), BL33  
11 (Zhongliao), and BL 35 (Huiyang), are generally selected for the regulation of the  
12 bladder voiding function [20-22]. A literature review showed that acupuncture  
13 demonstrated more favourable effects than did antimuscarinic drugs for the treatment  
14 of OAB and alleviation of symptoms in some comparative trials [23]. In addition,  
15 acupuncture reportedly improved the quality of life (QoL) and urodynamic testing  
16 parameters in patients with OAB [23· 24]. In a randomized, double-blind,  
17 placebo-controlled study, electroacupuncture significantly increased the maximum  
18 cystometric capacity and bladder compliance, decreased the detrusor leak point  
19 pressure, alleviated lower urinary tract symptoms, and decreased the risk of upper  
20 urinary tract damage in patients with post-stroke detrusor overactivity [22]. However,  
21 high-quality clinical trials with appropriate inclusion criteria, sample size, control  
22 design, acupoint selection, depth of needle insertion, and efficacy and safety  
23 evaluations are necessary to properly evaluate the efficacy of acupuncture for the  
24 treatment of post-stroke UI [7· 25· 26].  
25  
26  
27  
28  
29  
30  
31  
32  
33

34 On the basis of the theory of nerve stimulation, we developed electroacupuncture at  
35 ‘four sacral points’ [27· 28], also known as electroacupuncture neurostimulation  
36 therapy or electrical PN stimulation therapy. This approach involves the insertion of  
37 long needles at ‘four sacral points’, with electricity to stimulate specific nerves under  
38 the sacral region [28· 29]. When it was first developed, this treatment was used to treat  
39 stress UI (SUI) in women, and radiographic evidence with simultaneous records of  
40 perineal ultrasonographic pelvic floor muscle (PFM) contraction, vaginal pressure,  
41 and pelvic floor surface electromyography have shown that it causes PN excitation  
42 [29]. In addition, it has been used for the treatment of female urgency-frequency  
43 syndrome, idiopathic urgency UI, and UI caused by neurological or non-neurological  
44 conditions [28· 30· 31]. The mechanism of action of electroacupuncture at ‘four sacral  
45 points’ for post-stroke UI can be explained by the modulation of reflex pathways at  
46 spinal or supraspinal levels [3]. Electrical stimulation of the afferent branches of the  
47 PN can induce strong inhibition of the micturition reflex and detrusor hyper-reflexia  
48 [10], resulting in the effective treatment of post-stroke UI [31· 32].  
49  
50  
51  
52  
53  
54

55 The effectiveness of post-stroke UI treatment using alternative medicine  
56 approaches is worthy of investigation in a well-designed study. To the best of our  
57  
58  
59  
60

1  
2  
3 knowledge, no randomized controlled trials (RCT) comparing the efficacy and safety  
4 of electroacupuncture at ‘four sacral points’ with those of conventional  
5 electroacupuncture for the treatment of post-stroke UI have been conducted. Here we  
6 describe a protocol for an RCT to evaluate the efficacy and safety of  
7 electroacupuncture at ‘four sacral points’ for the management of post-stroke UI.  
8  
9

## 11 **METHODS AND ANALYSIS**

### 13 **Objectives**

14 This is a protocol comparing the efficacy and safety of electroacupuncture at ‘four  
15 sacral points’ with those of conventional electroacupuncture for the treatment of  
16 post-stroke UI. It is designed as a blinded randomized assessment and analysis with  
17 two parallel groups over a 4-week treatment period. Randomization will be performed  
18 in a random 1:1 allocation sequence.  
19

### 21 **Recruitment**

22 This is a pragmatic RCT comparing electroacupuncture at ‘four sacral points’ with  
23 conventional electroacupuncture for the treatment of post-stroke UI. The research  
24 structure is shown in Figure 1. A total of 140 eligible participants will be recruited  
25 from the inpatient and outpatient departments of the First Affiliated Hospital of  
26 Zhejiang Chinese Medical University according to the inclusion and exclusion criteria.  
27 At the beginning of recruitment, detailed information about the study, including the  
28 research objective, study procedure, and potential benefits and risks, will be provided  
29 to all eligible patients. If the patient agrees to participate, he or she will be asked to  
30 sign a written informed consent form. This will be followed by baseline assessment  
31 and randomization. A treatment period of 4 weeks and a follow-up period of 24 weeks  
32 will follow the recruitment procedure. The neurology department of the First  
33 Affiliated Hospital of Zhejiang Chinese Medical University has the major source of  
34 patients with post-stroke UI. Our reach team includes neurological physicians and  
35 special nurses who will interview potentially eligible patients. Advertisements will be  
36 released through health education brochures, posters, and videos displayed in the  
37 outpatient and inpatient sites of the First Affiliated Hospital of Zhejiang Chinese  
38 Medical University. Recruitment information will also be issued through media (e.g.  
39 newspapers, broadcasts, and websites).  
40  
41  
42  
43  
44  
45  
46  
47  
48

### 49 **Design**

#### 51 *Randomization and allocation concealment*

52 The randomization scheme has been created by the Clinical Evaluation and Analysis  
53 Center of The First Affiliated Hospital of Zhejiang Chinese Medical University, where  
54 professionals used SPSS Statistics 22.0 to generate a random 1:1 allocation sequence  
55 using a computer. Professionals involved in allocation will not be recruited in the  
56  
57  
58  
59  
60

1  
2  
3 study. The random allocation is strictly kept in an opaque envelope and is inaccessible  
4 to other research staff. After baseline assessment, the envelope will be opened by an  
5 independent staff member in the participant's presence, in order to determine the  
6 group assignment for that participant. All patients who give consent for participation  
7 and who fulfil the inclusion criteria will be assigned to a group randomly.  
8 Randomisation will be requested by the staff member responsible for recruitment and  
9 clinical interviews from the First Affiliated Hospital of Zhejiang Chinese Medical  
10 University. An independent staff member will open an envelope with printed  
11 randomisation numbers in the participant's presence. The therapists will be informed  
12 about the participant's allocation at the same time. The staff member responsible for  
13 recruitment and clinical interviews is not allowed to receive information about the  
14 group allocation.

### 15 *Blinding*

16 Considering the nature of acupuncture, therapists and participants cannot be blinded  
17 to the treatment allocation. Data managers and statisticians will be blinded throughout  
18 the trial. Telephone interviewers who collect follow-up information will also be  
19 blinded. Data managers, statisticians, and telephone interviewers are restricted from  
20 discussing the treatment allocations with each other. The therapists will not be  
21 permitted to communicate with any data managers, statisticians, or telephone  
22 interviewers. If an unblinding event occurs among data managers, statisticians, or  
23 telephone interviewers, the relevant work will be transferred to other appropriately  
24 blinded data managers, statisticians, or telephone interviewers. The Investigator must  
25 report all code breaks (with reason) as they occur on the corresponding CRF page.

## 26 **Participants**

### 27 *Sample size*

28 With reference to a similar study<sup>[33]</sup> with 120 women (efficacy rate, 70.1%:45%), the  
29 sample size has been calculated, using PASS 11 software, as 120 patients for a power  
30 (1-beta) of 0.80, an alpha (significance level) of 0.05, and a ratio of 1:1. With  
31 consideration of the estimated dropout rate (15%), the total sample size will be 140  
32 (70 in each group).

### 33 *Inclusion criteria*

- 34 1. Male or female patients aged 30–85 years
- 35 2. Diagnosis of post-stroke UI in accordance with the criteria of the American Stroke  
36 Association<sup>[34]</sup> and the International Continence Society<sup>[35]</sup>
- 37 3. Inpatients or outpatients with a post-stroke interval of 4 weeks to 2 years
- 38 4. Stable vital signs, normal consciousness, and compliance with treatment
- 39 5. Refractoriness to medications (patients who have taken antimuscarinic agents with  
40 no UI improvement)



1  
2  
3 6. Provision of written informed consent

4 *Exclusion criteria*

- 5 1. UI caused by other diseases such as Parkinson's disease, multiple sclerosis, spinal  
6 injury, or Alzheimer's disease  
7  
8 2. Pre-stroke UI, SUI or mixed UI, or overflow incontinence  
9  
10 3. Urinary retention concomitant with UI  
11  
12 4. Urethral injury, lower urinary tract obstruction, acute urinary tract infection,  
13 refractory urinary tract infection, hydronephrosis, urological calculi, or tumours  
14  
15 5. Severe cognitive impairment, as defined by a Mini-Mental State Examination  
16 (MMSE) score of <22 [36]  
17  
18 6. Insufficiency of the heart, lungs, liver, and/or kidneys  
19  
20 7. Presence of an implantable electronic device

21 *Elimination criteria*

- 22 1. Inclusion despite non-fulfilment of the inclusion criteria  
23  
24 2. Lack of exclusion despite fulfilment of the exclusion criteria  
25  
26 3. Eligible participants who receive no interventions

27 *Dropout criteria*

- 28 1. Poor participant compliance (lack of adherence to treatment for personal reasons)  
29  
30 2. Serious adverse events (SAE), complications, or special physiological changes  
31 necessitating discontinuation of the intervention  
32  
33 3. Voluntary dropout

34 **Intervention**

35 All participants will receive routine medical care for stroke recovery, including the  
36 control of blood pressure, blood sugar, and blood lipids and routine rehabilitation  
37 training. All of the study-related treatments will be provided by skilled acupuncturists  
38 who will strictly follow the detailed procedures for each group. During the treatment  
39 course and 24-week follow-up time, the administration of antimuscarinic agents and  
40 other drugs for neurogenic detrusor overactivity is prohibited for all the patients. They  
41 are also not permitted to receive other acupuncture treatment or physiotherapy for UI.  
42 All of the study-related treatments will be provided by certified and skilled  
43 acupuncturists who will strictly follow the detailed procedures for each group.

44 **Standard operating procedure**

- 45 1. Needle requirements  
46 Disposable sterile acupuncture needles in accordance with national standards  
47 within the validity period will be used.  
48  
49 2. Hand hygiene of the operator  
50 The operator is required to sterilize his or her hands with a sanitizer before the  
51 acupuncture procedure.  
52  
53 3. Sterilization of the acupuncture points  
54  
55  
56  
57  
58  
59  
60

1  
2  
3 Within a 5-cm diameter with the acupoint as the centre, sterilize the skin over the  
4 acupoints using a cotton swab dipped in 0.45%–0.55% povidone iodine or 75%  
5 ethanol.  
6

#### 7 4. Procedure

8 Treatment group: Participants in this group will receive electroacupuncture at  
9 ‘four sacral points’.

##### 10 a. Selection of points: Four sacral points (Figure 2 and Figure 3) are selected.

11 The two upper points are located on either side of the sacrococcygeal joint,  
12 approximately 1 cm from the joint. The two lower points are located on either  
13 side of the tip of the coccyx, approximately 1 cm from the coccyx.  
14 Acupuncture will be performed at LI15(Jianyu), LI11 (Quchi), LI10  
15 (Shousanli), SJ5 (Waiguan), and LI4 (Hegu) for participants with upper limb  
16 paralysis. For participants with lower limb paralysis, ST31 (Biguan), ST34  
17 (Liangqiu), SP10 (Xuehai), SP9 (Yinlingquan), GB39 (Xuanzhong), GB40  
18 (Qiuxu), and LR3 (Taichong) will also be used. GB20 (Fengchi), SJ17  
19 (Yifeng), and GB12 (Wangu) will be used for participants with dysphagia,  
20 with the additional use of ST4 (Dicang), ST6 (Jiache), and LI20 (Yingxiang)  
21 for participants with facial paralysis and drooling.  
22

##### 23 b. Detailed procedure: At the upper sacral points, a needle (Suzhou Shenlong 24 Medical Apparatus Factory, Suzhou, China) measuring $0.40 \times 100$ mm will be 25 inserted perpendicularly to a depth of 80–90 mm to induce a sensation 26 referred to the urethra or anus via stimulation of the main trunk of the PN. At 27 the lower sacral points, a needle measuring $0.40 \times 100$ or $0.40 \times 125$ mm will 28 be inserted obliquely toward the ischiorectal fossa to a depth of 90–110 mm 29 to induce a sensation referred to the urethra via stimulation of the perineal 30 nerve (Figure 4). Once the sensation is induced in the respective regions, two 31 pairs of electrodes from the G6805-A electroacupuncture device (Shantou 32 Medical equipment factory, Shantou, China) will be connected to the two 33 ipsilaterally inserted needles, with the anode connected to the upper needle 34 and the cathode connected to the lower needle. The device will be set to 35 produce electrical stimulation (biphasic 2-ms pulse duration) at a frequency of 36 2.0 Hz and a moderate intensity of 25–35 mA. Electrostimulation will be 37 performed for 20 min during each treatment. PFM contraction around the 38 urethra (often comfortable) must be maintained during the entire 39 electrostimulation procedure. Conventional acupuncture without electricity 40 will be applied for 20 min at the remaining acupoints. 41 42 43 44 45 46 47 48 49 50 51 52 53

54 Control group: Participants in this group will receive conventional  
55 electroacupuncture.  
56  
57

- 1  
2  
3 a. Selection of points: Abdominal points CV6 (Qihai), CV4 (Guanyuan), and  
4 ST28 (Shuidao, both sides), corresponding to the conventional  
5 electroacupuncture treatment of UI. The point selection procedure for participants  
6 with upper or lower limb paralysis, facial paralysis, and/or dysphagia will be the  
7 same as that used for the treatment group.  
8  
9 b. Detailed procedure: At CV6 (Qihai), CV4 (Guanyuan), and ST28 (Shuidao),  
10 a needle measuring 0.25 × 40 mm will be inserted perpendicularly to a depth of  
11 25–40 mm to induce a local sensation (distention or sourness). Subsequently, the  
12 electrodes from the G6805-A electroacupuncture device will be connected to the  
13 needles at these points, with the anode connected to ST28 and the cathode  
14 connected to CV6 and CV4. The device will be set to produce electrical  
15 stimulation (biphasic 2-ms pulse duration) at a frequency of 2.0 Hz and a  
16 moderate intensity that is tolerable by the participants. Electrostimulation will be  
17 performed for 20 min during each treatment. Conventional acupuncture without  
18 electricity will be applied for 20 min at the remaining acupoints.  
19  
20 5. Treatment period: All participants will receive treatment every day from Monday  
21 to Friday. One course of treatment will comprise 10 sessions. The therapeutic  
22 effects will be evaluated after the completion of two treatment courses (4 weeks).  
23  
24  
25  
26  
27  
28  
29

### 30 Outcome measures

#### 31 Primary outcome measures

##### 32 The incontinent episode diary

33 The incontinent episode diary (Table 1) will be used to derive the primary outcome  
34 measure. The number of incontinent episodes will be recorded by the participants  
35 over a period of 3 days at baseline. A template will be provided for patient use. This  
36 data will be recorded again at the end of treatment.  
37  
38  
39  
40

41 Table 1 The incontinent episode diary

| Name                                                                     | Date |       |  |       |  |
|--------------------------------------------------------------------------|------|-------|--|-------|--|
| Record every accidental loss of urine over 3 consecutive days with an X. |      |       |  |       |  |
| Start at baseline and continue recording for 3 days                      |      |       |  |       |  |
| Day 1                                                                    |      | Day 2 |  | Day 3 |  |
| eg X                                                                     |      |       |  |       |  |
|                                                                          |      |       |  |       |  |
|                                                                          |      |       |  |       |  |
|                                                                          |      |       |  |       |  |
|                                                                          |      |       |  |       |  |
|                                                                          |      |       |  |       |  |

1  
2  
3 *Secondary outcome measures*

4 1. International Consultation on Incontinence Questionnaire Urinary Incontinence –  
5 Short Form (ICIQ-UI SF) [37] (Table 2)

6  
7 2. Barthel Activities of Daily Living Index (Barthel ADL Index) [38] (Table 3)

8 The ICIQ-UI SF is used in research and clinical practice worldwide. It is a brief and  
9 psychometrically robust patient-completed questionnaire for evaluating the frequency  
10 and severity of UI in men and women and its impact on quality of life (QoL). The  
11 ICIQ-UI SF score ranges from 0 to 21 [39]. The Barthel ADL Index is a 10-item  
12 measure of activities of daily living (ADL) that is frequently used in clinical practice  
13 and as a trial outcome measure in stroke medicine [38]. It is used to assess baseline  
14 abilities to quantify functional changes, including UI, after rehabilitation in stroke  
15 patients.  
16

17 The above outcome measures will be assessed at baseline and at 4 and 28 weeks after  
18 baseline.  
19  
20  
21  
22  
23  
24  
25  
26  
27  
28  
29  
30  
31  
32  
33  
34  
35  
36  
37  
38  
39  
40  
41  
42  
43  
44  
45  
46  
47  
48  
49  
50  
51  
52  
53  
54  
55  
56  
57  
58  
59  
60

1  
2  
3  
4  
5  
6  
7  
8  
9  
10  
11  
12  
13  
14  
15  
16  
17  
18  
19  
20  
21  
22  
23  
24  
25  
26  
27  
28  
29  
30  
31  
32  
33  
34  
35  
36  
37  
38  
39  
40  
41  
42  
43  
44  
45  
46  
47

Table 2 International Consultation on Incontinence Questionnaire Urinary Incontinence – Short Form (ICIQ-UI SF)

|                                                                                                                                                        |                                                                                     |                            |
|--------------------------------------------------------------------------------------------------------------------------------------------------------|-------------------------------------------------------------------------------------|----------------------------|
| 1. Please write in your date of birth:                                                                                                                 | <input type="text"/> <input type="text"/> <input type="text"/> <input type="text"/> |                            |
|                                                                                                                                                        | date month year                                                                     |                            |
| 2. Are you                                                                                                                                             | Female <input type="checkbox"/> Male <input type="checkbox"/>                       |                            |
| 3. How often do you leak urine?<br>(Tick one box)                                                                                                      |                                                                                     |                            |
|                                                                                                                                                        | never                                                                               | <input type="checkbox"/> 0 |
|                                                                                                                                                        | about once a week or less often                                                     | <input type="checkbox"/> 1 |
|                                                                                                                                                        | two or three times a week                                                           | <input type="checkbox"/> 2 |
|                                                                                                                                                        | about once a day                                                                    | <input type="checkbox"/> 3 |
|                                                                                                                                                        | several times a day                                                                 | <input type="checkbox"/> 4 |
|                                                                                                                                                        | all the time                                                                        | <input type="checkbox"/> 5 |
| 4. We would like to know how much urine you think leaks.<br>How much urine do you usually leak (whether you wear protection or not)?<br>(Tick one box) |                                                                                     |                            |
|                                                                                                                                                        | None                                                                                | <input type="checkbox"/> 0 |
|                                                                                                                                                        | a small amount                                                                      | <input type="checkbox"/> 2 |
|                                                                                                                                                        | a moderate amount                                                                   | <input type="checkbox"/> 4 |
|                                                                                                                                                        | a large amount                                                                      | <input type="checkbox"/> 6 |
| 5. Overall, how much does leaking urine interfere with your everyday life?<br>Please ring a number between 0 (not at all) and 10 (a great deal)        |                                                                                     |                            |
|                                                                                                                                                        | 0    1    2    3    4    5    6    7    8    9    10                                |                            |
|                                                                                                                                                        | not at all                                                                          | a great deal               |

1  
2  
3  
4  
5  
6  
7  
8  
9  
10  
11  
12  
13  
14  
15  
16  
17  
18  
19  
20  
21  
22  
23  
24  
25  
26  
27  
28  
29  
30  
31  
32  
33  
34  
35  
36  
37  
38  
39  
40  
41  
42  
43  
44  
45  
46  
47

ICIQ score: sum scores 3+4+5 □□

6. When does urine leak? (Please tick all that apply to you)

- never – urine does not leak □
- leaks before you can get to the toilet □
- leaks when you cough or sneeze □
- leaks when you are asleep □
- leaks when you have finished urinating and are dressed □
- leaks for no obvious reason □
- leaks all the time □

Table 3 Barthel Activities of Daily Living Index (Barthel ADL Index)

| The Barthel Index |                                                                                                   | Patient Name |
|-------------------|---------------------------------------------------------------------------------------------------|--------------|
|                   |                                                                                                   | Rater Name   |
|                   |                                                                                                   | Date:        |
| Activity          |                                                                                                   | Score        |
| Feeding           | Unable                                                                                            | 0            |
|                   | Some help required (e.g., needs help cutting, spreading butter, etc. or requires a modified diet) | 5            |
|                   | Independent                                                                                       | 10           |
| Bathing           | Dependent                                                                                         | 0            |
|                   | Independent (or in shower)                                                                        | 5            |
| Grooming          | Needs help with personal care                                                                     | 0            |

1  
2  
3  
4  
5  
6  
7  
8  
9  
10  
11  
12  
13  
14  
15  
16  
17  
18  
19  
20  
21  
22  
23  
24  
25  
26  
27  
28  
29  
30  
31  
32  
33  
34  
35  
36  
37  
38  
39  
40  
41  
42  
43  
44  
45  
46  
47

|                                  |                                                                        |    |
|----------------------------------|------------------------------------------------------------------------|----|
|                                  | Independent face/hair/teeth/shaving (implements provided)              | 5  |
| Dressing                         | Dependent                                                              | 0  |
|                                  | Needs help but can do at least half unaided                            | 5  |
|                                  | Independent (including buttons, zips, laces, etc.)                     | 10 |
| Bowels                           | Incontinent or catheterized and unable to manage alone                 | 0  |
|                                  | Occasional accident                                                    | 5  |
|                                  | Continent                                                              | 10 |
| Bladder                          | Incontinent or catheterized and unable to manage alone                 | 0  |
|                                  | Occasional accident                                                    | 5  |
|                                  | Continent                                                              | 10 |
| Toilet use                       | Dependent                                                              | 0  |
|                                  | Needs some help, but can do some things alone                          | 5  |
|                                  | Independent (can get on and off, dress and wipe unassisted)            | 10 |
| Transfer (bed to chair and back) | Unable, no sitting balance                                             | 0  |
|                                  | Major help (one or two people, physical), can sit                      | 5  |
|                                  | Minor help (verbal or physical)                                        | 10 |
|                                  | Independent                                                            | 15 |
| Mobility (on level surfaces)     | Immobile or <50 yards                                                  | 0  |
|                                  | Wheelchair independent, including corners; >50 yards                   | 5  |
|                                  | Walks with little help from one person (verbal or physical); >50 yards | 10 |
|                                  | Independent (but may use an aid; e.g., walking stick); >50 yards       | 15 |
| Stairs                           | Unable                                                                 | 0  |
|                                  | Needs help (verbal, carrying aid)                                      | 5  |
|                                  | Independent                                                            | 10 |
| Total                            |                                                                        |    |

### **Adverse events (AEs)**

An adverse event of acupuncture is defined as symptoms or diseases that are against the purpose of the treatment during or following the acupuncture treatment [40]. The research staff will record the blood pressure, heart rate, heart rhythm, and respiration rate and observe changes in the consciousness of all participants before and after the treatment. The description of AEs, time of occurrence, location of the reaction, level of severity, corresponding management, and the necessity for patient withdrawal from the trial will be recorded on the Case Report Forms (CRFs). AEs of acupuncture will be classified according to their location as local and systemic reactions.

#### **Local reactions:**

- Subcutaneous haematoma
- Minor bleeding on withdrawal of the needle
- Subcutaneous bruise
- Pain in the punctured region after treatment
- Skin allergy in the punctured region after treatment
- Local infection

#### **Systemic reactions:**

- Acupuncture fainting
- Abdominal distention
- Dizziness or vertigo
- Leg weakness
- Muscle spasm
- Systemic allergy
- Systemic infection
- Organ injury

Severe AEs are defined as symptoms or diseases that result in hospitalization or prolong hospitalization, disability, a life-threatening situation, or even death [41]. Systemic infection and organ injury are two major AEs. Severe AEs will be reported to the Ethics Committee within 24 h. The Ethics Committee will provide medical suggestions for the research team and decide whether the patient should continue the ongoing treatment.

For patients having common adverse reactions, appropriate medical care will be given to ease local bleeding, irritation, bruising, and so on. For those who have severe reactions leading to organ injury, systematic infection, systematic allergy, and so on, compensation will be given to cover their medical costs by our research team.

### **Data management, monitoring and auditing**

A research assistant will record the baseline characteristics of all participants. Trained caregivers will record the frequency of UI at baseline and at 4 weeks after baseline. A researcher who remains blinded to treatment group allocation will collect data regarding the frequency of UI and the weight of pads from the caregivers. The participants will also complete ICIQ-UI SF and the Barthel ADL Index at baseline and



1  
2  
3 at 4 weeks after baseline. A blinded telephone interviewer will interview the  
4 participants and collect data pertaining to ICIQ-UI SF and the Barthel ADL Index at  
5 28 weeks after baseline. All data will be recorded on the CRFs. For participants who  
6 discontinue treatment early, we will use last observation carried forward analysis to  
7 handle the missing data, meaning that we will input outcome data of patients who are  
8 lost to follow-up in our analysis.  
9

10 After the completion of the CRFs, two independent researchers blinded to the group  
11 allocation will separately input data into an Excel spreadsheet. Another independent  
12 supervisor will check the two datasets for consistency. If conflicting data entries are  
13 discovered, the supervisor will compare the datasets with the original CRFs and mark  
14 the modification on the CRFs. The principal investigator of the research team will  
15 have the access to all documents and will protect the electronic documents with a  
16 password and create backups of all documents. The First Affiliated Hospital of  
17 Zhejiang Chinese Medical University will be responsible for the storage and  
18 management of all data.  
19

20 An independent data monitoring committee (DMC) is made up of members from  
21 Clinical Evaluation and Analysis Center of The First Affiliated Hospital of Zhejiang  
22 Chinese Medical University. The DMC, blinded to the treatment allocations, will meet  
23 regularly to monitor the study data. The DMC will also perform interim-analysis  
24 when 50% of patients have been randomised and have completed the primary  
25 outcome measurement.  
26  
27  
28

29 The First Affiliated Hospital of Zhejiang Chinese Medical University will audit this  
30 study mainly for participant enrolment, consent, and costs.  
31  
32

### 33 **Statistical analysis**

34 All statistical analyses will be performed by a statistician from the Clinical Evaluation  
35 and Analysis Center of The First Affiliated Hospital of Zhejiang Chinese Medical  
36 University using SPSS Statistics 22.0. A normality test will be used to determine  
37 whether the data are normally distributed. ANCOVA (analysis of covariance) will be  
38 used if there is imbalance in the baseline characteristics and outcome measures.  
39 Continuous variables with a normal distribution will be expressed as means  $\pm$   
40 standard deviations (SDs). Continuous variables with a non-normal distribution or  
41 ordinal variables will be expressed as medians (with lower, upper quartiles).  
42 Categorical variables will be summarized as counts and proportions. A Student's t-test  
43 will be used if the primary and secondary outcome measures conform to normal  
44 distribution. A paired t-test will be used to compare pre-treatment and post-treatment  
45 UI occurrence for the primary outcome measure and pre-treatment and post-treatment  
46 scores in the secondary outcome measures. The independent sample t-test will be used  
47 to compare the difference between two groups for primary and secondary outcome  
48 measures. A Wilcoxon signed rank test will be used if the primary and secondary  
49 outcome measures conform to abnormal distribution. A Wilcoxon paired test will be  
50 used to compare pre-treatment and post-treatment UI occurrence for the primary  
51 outcome measure and pre-treatment and post-treatment scores in secondary outcome  
52 measures. The inter-group rank sum test will be used to compare the difference  
53  
54  
55  
56  
57  
58  
59  
60

1  
2  
3 between two groups for primary and secondary outcome measures. All reported  
4 P-values will be two-sided, and confidence intervals (CI) will be at the 95% level. A  
5 P-value of <0.05 will be considered statistically significant.  
6  
7

### 8 **Patient and Public Involvement**

9 Patients and the public were not directly involved in the design, recruitment or  
10 conduct of this pilot study. Since the participants in our study are under chronic  
11 conditions, the outcome measures valued in this study was influenced by patients'  
12 priorities, experience and preferences. As most stroke patients are in great need of  
13 acupuncture treatment in China, we did not view the intervention as burdensome and  
14 the burden of the intervention was not assessed by the patients themselves. The results  
15 of this study will be disseminated in peer-reviewed journals and at academic  
16 conferences. A summary of the study report will be written for patients through online  
17 website (<https://sandyshen.haodf.com/>) and WeChat (a free messaging and  
18 calling application) account or group.  
19  
20  
21  
22

## 23 **ETHICS AND DISSEMINATION**

### 24 **Research ethics approval**

25 The Ethics Committee of the First Affiliated Hospital of Zhejiang Chinese Medical  
26 University has reviewed and approved this protocol (approval No. 2018-K-059-01).  
27 This study will adhere to the principles of the Declaration of Helsinki. This study will  
28 be conducted at the First Affiliated Hospital of Zhejiang Chinese Medical University.  
29 Each participant will voluntarily sign written informed consent forms.  
30  
31  
32

### 33 **Modification of the protocol**

34 Any modifications to the protocol, including changes of study objectives, study design,  
35 patient population, sample sizes, study procedures, or significant administrative  
36 aspects, will require a formal application to the Zhejiang Provincial Administration of  
37 Traditional Chinese Medicine as well as the Chinese clinical trial registry.  
38  
39

### 40 **Confidentiality**

41 All study participants will be given an identification number throughout the trial to  
42 assure confidentiality. All participants' information will be stored in locked cabinets  
43 with limited access.  
44  
45

### 46 **Dissemination**

47 The initial data will be accessible via Research Manager (ResMan). The results of this  
48 study will be published in open-access and peer-reviewed journals and presented at  
49 relevant conferences.  
50  
51  
52

## 53 **DISCUSSION**

54 According to the present study protocol, in addition to electroacupuncture at 'four  
55 sacral points' in the treatment group and conventional electroacupuncture in the  
56  
57  
58  
59  
60

control group, the same acupoints for other stroke symptoms will also be selected for both groups. Other stroke symptoms include unilateral limb weakness, facial paresis, dysphasia, and dysphagia [42]. In China, acupuncture has been a primary medical intervention for stroke [43]. In fact, not providing acupuncture therapy to a stroke patient is considered impractical.

Antimuscarinic agents are considered first-line drugs for neurogenic detrusor overactivity (NDO) [44]. However, because of their moderate efficacy and troublesome side effects, quite a few patients exhibit refractory disease [45]. According to the eligibility criteria, participants who are refractory to medication will be included in this RCT.

With regard to the outcome measures, the incontinent episode diary will be used as objective measure to record the frequency of incontinence. Patients will record their findings in the incontinent diary for only 3 days, because a longer recording period can lead to decreased patient compliance [46-47]. In order to improve adherence, health education about the importance of UI management will be conducted by a special nurse and brochures on post-stroke UI will be provided to patients. The ICIQ-UI SF and Barthel ADL Index will be used as subjective measures to investigate UI symptoms and QoL. The ICIQ-UI SF is a useful tool to assess UI with regard to the severity of symptoms and impact on QoL at baseline and at follow-up [48]. The Barthel ADL Index (feeding, bathing, grooming, dressing, bowels, bladder, toilet use, transfer, mobility, and stairs) is an important predictor of stroke outcomes. Studies involving stroke survivors should include ADL assessments for better management of stroke patients [38].

In summary, we have described a protocol for a pilot RCT to evaluate the efficacy and safety of electroacupuncture at 'four sacral points' for the treatment of post-stroke UI. The results of this trial should lead to a greater understanding of promising alternative options for post-stroke UI.

### Author affiliations

<sup>1</sup>Department of Acupuncture and Moxibustion, the First Affiliated Hospital of Zhejiang Chinese Medical University, Hangzhou, China

<sup>2</sup>Clinical Research Section, Shanghai Research Institute of Acupuncture and Meridian, Shanghai, China

<sup>3</sup>Clinical Evaluation and Analysis Center of the First Affiliated Hospital of Zhejiang Chinese Medical University, Hangzhou, China

<sup>4</sup>Department of Computer Science, Huaqiao University, Xiamen, China

<sup>5</sup>Rehabilitation Unit of the First Affiliated Hospital of Zhejiang Chinese Medical University, Hangzhou, China

### Contributors

SC conceived and wrote the protocol; SYW and LHX contributed to the study design; HTL contributed to the sample size calculation and wrote the statistical analysis plan; ZKH drew the flow charts; CZ and HFZ prepared the figures and tables. All authors have read and approved the final manuscript.

### Funding Statement

This work was supported by Zhejiang Provincial Administration of Traditional Chinese Medicine (grant number 2018ZA045).

### Competing Interests Statement

None

### Ethics approval

The Ethics Committee of the First Affiliated Hospital of Zhejiang Chinese Medical University.

### Provenance and peer review

Not commissioned; externally peer reviewed.

### REFERENCES

- 1 Abrams P, Andersson KE, Birder L, et al. Fourth International Consultation on Incontinence Recommendations of the International Scientific Committee: Evaluation and treatment of urinary incontinence, pelvic organ prolapse, and fecal incontinence. *Neurourol Urodyn* 2010;29:213-40.
- 2 Ruffion A, Castro DD, Patel H, et al. Systematic review of the epidemiology of urinary incontinence and detrusor overactivity among patients with neurogenic overactive bladder. *Neuroepidemiology* 2013;41:146-55.
- 3 Mehdi Z, Birns J, Bhalla A, et al. Post-stroke urinary incontinence. *Int J Clin Pract* 2013;67:1128-37.
- 4 Cai W, Wang J, Wang L, et al. Prevalence and risk factors of urinary incontinence for post-stroke inpatients in Southern China. *Neurourol Urodyn* 2015;34:231-5.
- 5 Pizzi A, Falsini C, Martini M, et al. Urinary incontinence after ischemic stroke: clinical and urodynamic studies. *Neurourol Urodyn* 2014;33:420-5.
- 6 Gregor J, Steve P, Siobhan C, et al. Urinary incontinence and indwelling urinary catheters as predictors of death after new-onset stroke: a report of the south london stroke register. *J Stroke Cerebrovasc Dis* 2018;27:118-24.
- 7 Thomas LH, Cross S, Barrett J, et al. Treatment of urinary incontinence after stroke in adults. *Cochrane Database of Systematic Reviews* 2008;23:CD004462.
- 8 Paniker JN. Urogenital symptoms in neurologic patients. *Continuum*. 2017;23:533-52.
- 9 Amundsen CL, Komesu YM, Chermansky C, et al. Two-Year outcomes of sacral neuromodulation versus onabotulinumtoxinA for refractory urgency urinary incontinence: a randomized trial. *Eur Urol* Published Online First: 23 February 2018. doi:10.1016/j.eururo.2018.02.011
- 10 Bosch JL. Electrical neuromodulatory therapy in female voiding dysfunction. *BJU Int* 2006;98 suppl:43-8.
- 11 van Balken MR, Vergunst H, Bemelmans BL. The use of electrical devices for the treatment of bladder dysfunction: a review of methods. *J Urol* 2004;172:846-51.

- 1  
2  
3 12 Smits MA, Oerlemans D, Marcelissen TA, et al. Sacral neuromodulation in  
4 patients with idiopathic overactive bladder after initial botulinum toxin therapy. *J*  
5 *Urol* 2013;190:2148-52.
- 6 13 Siegel S, Noblett K, Mangel J, et al. Results of a prospective, multicenter study  
7 evaluating quality of life, safety, and efficacy of sacral neuromodulation at twelve  
8 months in subjects with symptoms of overactive bladder. *Neurourol Urodyn*  
9 2016;34:246-51.
- 10 14 Spinelli M, Sievert KD. Latest technologic and surgical developments in using  
11 InterStim Therapy for sacral neuromodulation: impact on treatment success and safety.  
12 *Eur Urol* 2008;54:1287-96.
- 13 15 Hijaz A, Vasavada SP, Daneshgari F, et al. Complications and troubleshooting of  
14 two-stage sacral neuromodulation therapy: a single-institution experience. *Urology*  
15 2006;68:533-7.
- 16 16 Lee C, Pizarro-Berdichevsky J, Clifton MM, et al. Sacral neuromodulation  
17 implant infection: risk factors and prevention. *Curr Urol Rep* 2017;18:16.
- 18 17 Peters KM. Alternative approaches to sacral nerve stimulation. *Int Urogynecol J*  
19 2010;21:1559-63.
- 20 18 Groen J, Amiel C, Bosch JL. Chronic pudendal nerve neuromodulation in women  
21 with idiopathic refractory detrusor overactivity incontinence: results of a pilot study  
22 with a novel minimally invasive implantable mini-stimulator. *Neurourol Urodyn*  
23 2005;24:226-30.
- 24 19 Sun Z, Yu N, Yue J, et al. Acupuncture for urinary incontinence after stroke: a  
25 protocol for systematic review. *BMJ Open* 2016;6:e008062.
- 26 20 Song F, Jiang S, Zheng L, et al. Electroacupuncture for post-stroke urinary  
27 incontinence: a multicenter randomized controlled study. *Zhongguo Zhen Jiu*  
28 2013;33:769-73.
- 29 21 Paik SH, Han SR, Kwon OJ, et al. Acupuncture for the treatment of urinary  
30 incontinence: A review of randomized controlled trials. *Exp Ther Med* 2013;6:773-80.
- 31 22 Liu Y, Liu L, Wang X. Electroacupuncture at points Baliao and Huiyang (BL35)  
32 for post-stroke detrusor overactivity. *Neural Regen Res* 2013;8:1663-72.
- 33 23 Forde JC, Jaffe E, Stone BV, et al. The role of acupuncture in managing  
34 overactive bladder; a review of the literature. *Int Urogynecol J* 2016;27:1645-51.
- 35 24 Olivera CK, Meriwether K, El-Nashar S, et al. Nonantimuscarinic treatment for  
36 overactive bladder: a systematic review. *Am J Obstet Gynecol* 2016;215:34-57.
- 37 25 Solberg M, Alræk T, Mdala I, et al. A pilot study on the use of acupuncture or  
38 pelvic floor muscle training for mixed urinary incontinence. *Acupunct Med*  
39 2016;34:7-13.
- 40 26 Liu Z, Wang Y, Xu H, et al. Observation on therapeutic effect of  
41 electroacupuncture for post-stroke urge incontinence. *Xin Zhong Yi* 2010;42:73-5.
- 42 27 Wang S, Chen G, Li L. "Four sacral needles therapy" for female stress  
43 incontinence. *Shanghai J Acup Moxib* 2006;25:15-7.
- 44 28 Lu J. Observation on therapeutic effect of electroacupuncture neurostimulation  
45 therapy for urge urinary incontinence. *Zhongguo Zhenjiu* 2012;32:691-5.
- 46 29 Wang S, Zhang S. Simultaneous perineal ultrasound and vaginal pressure  
47  
48  
49  
50  
51  
52  
53  
54  
55  
56  
57  
58  
59  
60

- 1  
2  
3 measurement prove the action of electrical pudendal nerve stimulation in treating  
4 female stress incontinence. *BJU International* 2012;110:1338-1343.
- 5 30 Wang S, Zhang S, Zhao L. Long-term efficacy of electrical pudendal nerve  
6 stimulation for urgency–frequency syndrome in women. *Int Urogynecol J*  
7 2014;25:397-402.
- 8 31 Wang S, LvJ, FX et al. Efficacy of electrical pudendal nerve stimulation versus  
9 transvaginal electrical stimulation in treating female idiopathic urgency urinary  
10 incontinence. *J Urol* 2017;197:1496-501.
- 11 32 Wang S. Electroacupuncture pudendal nerve stimulation and its application. *J*  
12 *Acupunt Tuina Sci* 2013;11:117-21.
- 13 33 Wang S, Lv J, Feng X, et al. Efficacy of Electrical Pudendal Nerve Stimulation  
14 versus Transvaginal Electrical Stimulation in Treating Female Idiopathic Urgency  
15 Urinary Incontinence. *J Urol* 2017;6:1496-501.
- 16 34 Sacco RL, Kasner SE, Broderick JP, et al. An updated definition of stroke for the  
17 21st century: a statement for healthcare professionals from the American Heart  
18 Association/American Stroke Association. *Stroke* 2013;44:2064-89.
- 19 35 Haylen BT, de Ridder D, Freeman RM, et al. Association (IUGA)/International  
20 Continence Society (ICS) joint report on the terminology for female pelvic floor  
21 dysfunction. *Neurourol Urodyn* 2010;29:4-20.
- 22 36 Grut M, Fratiglioni L, Viitanen M, et al. Accuracy of the Mini-Mental Status  
23 Examination as a screening test for dementia in a Swedish elderly population. *Acta*  
24 *Neurol Scand* 1993;87:312-71993-04-01.
- 25 37 Timmermans L, Falez F, Mélot C, et al. Validation of use of the International  
26 Consultation on Incontinence Questionnaire-Urinary Incontinence-Short Form  
27 (ICIQ-UI-SF) for impairment rating: a transversal retrospective study of 120 patients.  
28 *Neurourol Urodyn* 2013;32:974-9.
- 29 38 Duffy L, Gajree S, Langhorne P, et al. Reliability (inter-rater agreement) of the  
30 Barthel Index for assessment of stroke survivors: systematic review and meta-analysis.  
31 *Stroke* 2013;44:462-8.
- 32 39 Hajebrahimi S, Nourizadeh D, Hamedani R, et al. Validity and reliability of the  
33 International Consultation on Incontinence Questionnaire-Urinary Incontinence Short  
34 Form and its correlation with urodynamic findings. *Urol J* 2012;9:685-90.
- 35 40 Li Y, Liu Y, Zhang J, et al. Analysis on the situation of adverse reaction to  
36 acupuncture and acupuncture risk. *Zhongguo Zhenjiu* 2011;31:764-8.
- 37 41 Zhao L, Li Y, Zhang F, et al. Analysis on the occurrence of laws of adverse  
38 events from 1968 patients after acupuncture treatment. Symposium of seminar of the  
39 Ninth National Young and Middle-aged Acupuncture and Tuina of China  
40 Acupuncture and Moxibustion Association 2010;270-6.
- 41 42 Yew KS, Cheng EM. Diagnosis of Acute Stroke. *Am Fam Physician*  
42 2015;91:528-36.
- 43 43 Zhang J, Wang D, Liu M. Overview of systematic reviews and meta-analyses of  
44 acupuncture for stroke. *Neuroepidemiology* 2014;42:50-8.
- 45 44 Mehnert U, Kessler TM. The management of urinary incontinence in the male  
46 neurological patient. *Curr Opin Urol* 2014;24:586-92.
- 47  
48  
49  
50  
51  
52  
53  
54  
55  
56  
57  
58  
59  
60

1  
2  
3 45 Smith AL, Wein AJ. Urinary incontinence: pharmacotherapy options. *Ann Med*  
4 2011;43:461-76.

5 46 Robinson D, McClish DK, Wyman JF, et al. Comparison between urinary diaries  
6 completed with and without intensive patient instructions. *Neurol Urodyn*  
7 1996;15:143-8.

8  
9 47 Gordon D, Grpouts A. Evaluation of female lower urinary tract symptoms:  
10 overview and update. *Curr Opin Obstet Gynecol* 2001;13:521-7.

11 48 Nyström E, Sjöström M, Stenlund H, et al. ICIQ symptom and quality of life  
12 instruments measure clinically relevant improvements in women with stress urinary  
13 incontinence. *Neurol Urodyn* 2015;34:747.  
14  
15

### 16 17 **Figure legends**

18  
19  
20 Figure 1 Study flowchart

21  
22 Figure 2 Locations of the 'four sacral points' for electroacupuncture

23  
24 Figure 3 Anatomical positions of the 'four sacral points' for electroacupuncture

25  
26 Figure 4 Transverse computed tomography (CT) image of the coccygeal apex

27  
28 The tip of the needle inserted at the lower sacral point is visible in the  
29 ischiorectal fossa (adjacent to the PN in Alcock's canal)  
30  
31  
32  
33  
34  
35  
36  
37  
38  
39  
40  
41  
42  
43  
44  
45  
46  
47  
48  
49  
50  
51  
52  
53  
54  
55  
56  
57  
58  
59  
60

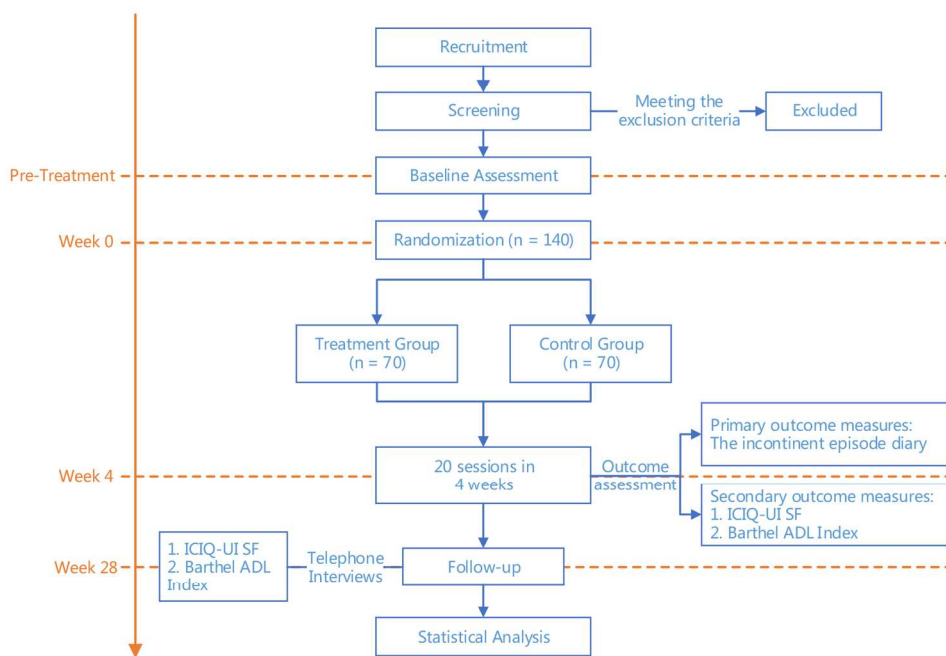

Study flowchart

151x105mm (300 x 300 DPI)

View only



1  
2  
3  
4  
5  
6  
7  
8  
9  
10  
11  
12  
13  
14  
15  
16  
17  
18  
19  
20  
21  
22  
23  
24  
25  
26  
27  
28  
29  
30  
31  
32  
33  
34  
35  
36  
37  
38  
39  
40  
41  
42  
43  
44  
45  
46  
47  
48  
49  
50  
51  
52  
53  
54  
55  
56  
57  
58  
59  
60

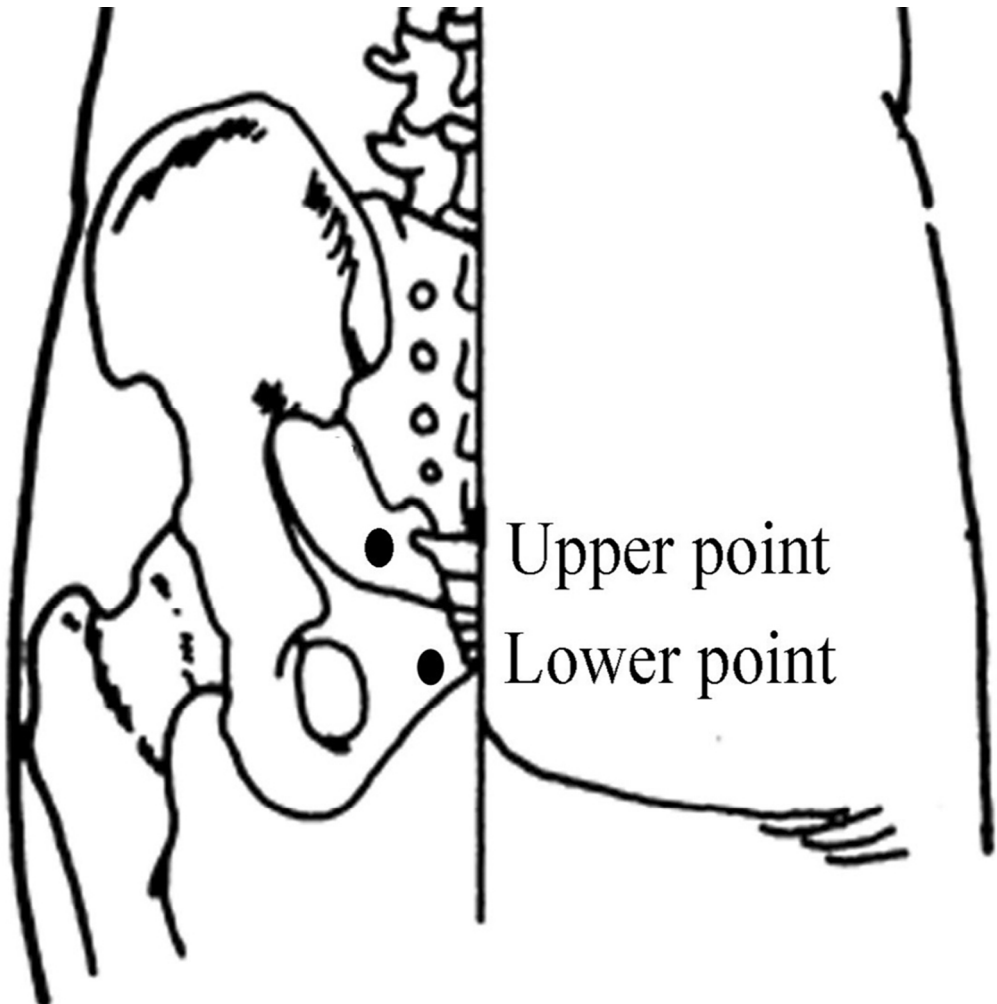

Locations of the 'four sacral points' for electroacupuncture

90x90mm (300 x 300 DPI)

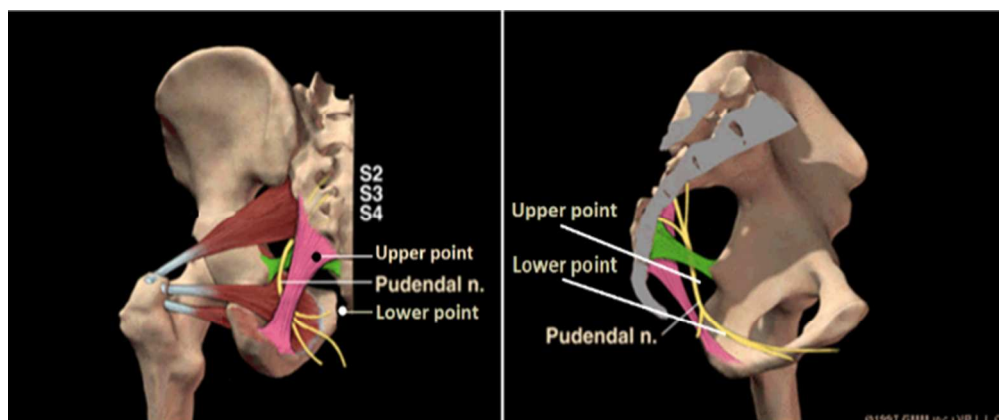

Anatomical positions of the 'four sacral points' for electroacupuncture

216x90mm (300 x 300 DPI)

1  
2  
3  
4  
5  
6  
7  
8  
9  
10  
11  
12  
13  
14  
15  
16  
17  
18  
19  
20  
21  
22  
23  
24  
25  
26  
27  
28  
29  
30  
31  
32  
33  
34  
35  
36  
37  
38  
39  
40  
41  
42  
43  
44  
45  
46  
47  
48  
49  
50  
51  
52  
53  
54  
55  
56  
57  
58  
59  
60

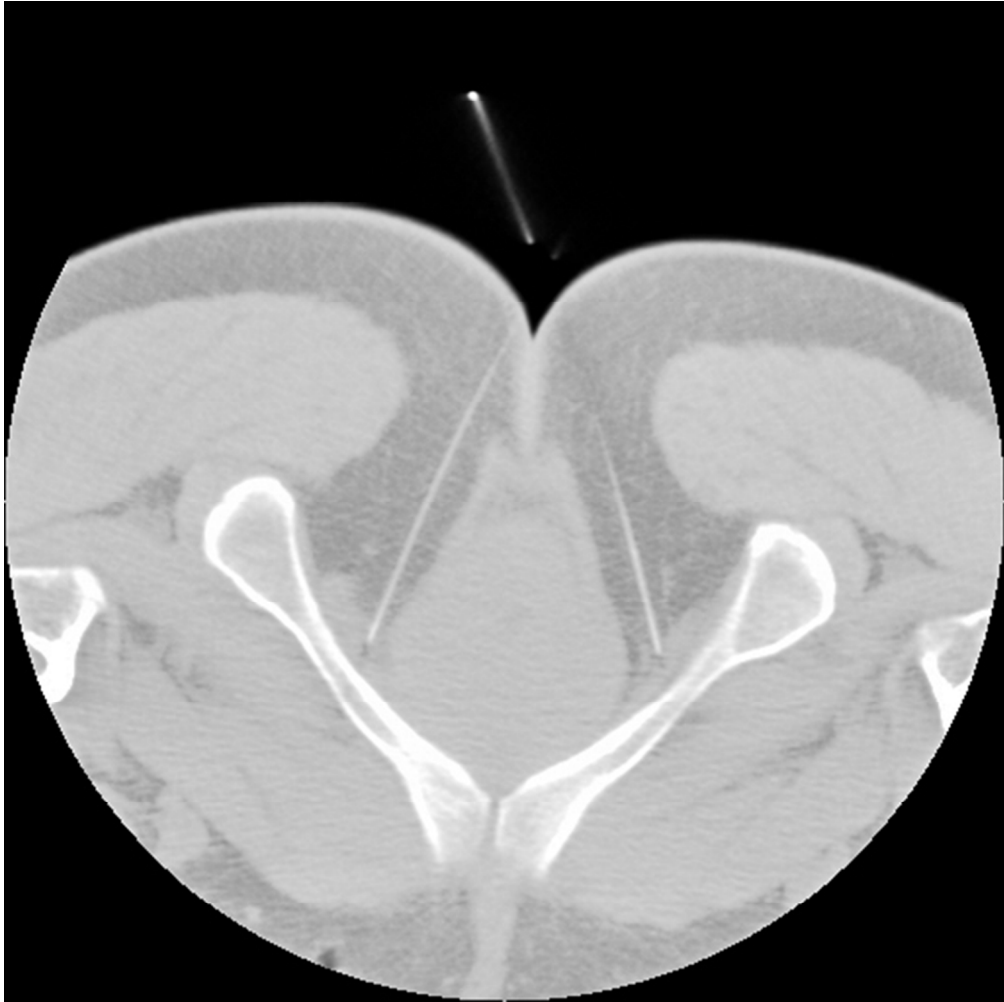

Transverse computed tomography (CT) image of the coccygeal apex  
The tip of the needle inserted at the lower sacral point is visible in the ischiorectal fossa (adjacent to the PN  
in Alcock's canal)

90x90mm (300 x 300 DPI)

| Section/item                                  | ItemNo                                                                                                                                                                                                                            | Description                                                                                                                                                                                                                                                                                                                                                                                                                                                                                                                                                                                                                                                                                                                                                                                                                                                                                                                                                                                                                                                                                                                                                                                                                                                                                                                                                                                                                                                                                                          |                                               |                     |                                          |             |                               |  |                                           |                                                                    |                 |                                                                    |                      |  |                            |                                            |                                |                                                                                                                                         |              |                                                                                                   |                  |                                                                                                                                                                                                                                   |                          |       |                                           |                                                          |
|-----------------------------------------------|-----------------------------------------------------------------------------------------------------------------------------------------------------------------------------------------------------------------------------------|----------------------------------------------------------------------------------------------------------------------------------------------------------------------------------------------------------------------------------------------------------------------------------------------------------------------------------------------------------------------------------------------------------------------------------------------------------------------------------------------------------------------------------------------------------------------------------------------------------------------------------------------------------------------------------------------------------------------------------------------------------------------------------------------------------------------------------------------------------------------------------------------------------------------------------------------------------------------------------------------------------------------------------------------------------------------------------------------------------------------------------------------------------------------------------------------------------------------------------------------------------------------------------------------------------------------------------------------------------------------------------------------------------------------------------------------------------------------------------------------------------------------|-----------------------------------------------|---------------------|------------------------------------------|-------------|-------------------------------|--|-------------------------------------------|--------------------------------------------------------------------|-----------------|--------------------------------------------------------------------|----------------------|--|----------------------------|--------------------------------------------|--------------------------------|-----------------------------------------------------------------------------------------------------------------------------------------|--------------|---------------------------------------------------------------------------------------------------|------------------|-----------------------------------------------------------------------------------------------------------------------------------------------------------------------------------------------------------------------------------|--------------------------|-------|-------------------------------------------|----------------------------------------------------------|
| <b>Administrative Information</b>             |                                                                                                                                                                                                                                   |                                                                                                                                                                                                                                                                                                                                                                                                                                                                                                                                                                                                                                                                                                                                                                                                                                                                                                                                                                                                                                                                                                                                                                                                                                                                                                                                                                                                                                                                                                                      |                                               |                     |                                          |             |                               |  |                                           |                                                                    |                 |                                                                    |                      |  |                            |                                            |                                |                                                                                                                                         |              |                                                                                                   |                  |                                                                                                                                                                                                                                   |                          |       |                                           |                                                          |
| Title                                         | 1                                                                                                                                                                                                                                 | Comparison of efficacy and safety between electroacupuncture at ‘four sacral points’ and conventional electroacupuncture for the treatment of urinary incontinence after stroke: study protocol for a randomized controlled trial <sup>1</sup>                                                                                                                                                                                                                                                                                                                                                                                                                                                                                                                                                                                                                                                                                                                                                                                                                                                                                                                                                                                                                                                                                                                                                                                                                                                                       |                                               |                     |                                          |             |                               |  |                                           |                                                                    |                 |                                                                    |                      |  |                            |                                            |                                |                                                                                                                                         |              |                                                                                                   |                  |                                                                                                                                                                                                                                   |                          |       |                                           |                                                          |
| Trial registration                            | 2a                                                                                                                                                                                                                                | ChiCTR-IOR-17012847 <sup>2</sup>                                                                                                                                                                                                                                                                                                                                                                                                                                                                                                                                                                                                                                                                                                                                                                                                                                                                                                                                                                                                                                                                                                                                                                                                                                                                                                                                                                                                                                                                                     |                                               |                     |                                          |             |                               |  |                                           |                                                                    |                 |                                                                    |                      |  |                            |                                            |                                |                                                                                                                                         |              |                                                                                                   |                  |                                                                                                                                                                                                                                   |                          |       |                                           |                                                          |
|                                               | 2b                                                                                                                                                                                                                                | <table border="1"> <tr> <td>Primary registry and trial identifying number</td> <td>ChiCTR-IOR-17012847</td> </tr> <tr> <td>Date of registration in primary registry</td> <td>30 Sep 2017</td> </tr> <tr> <td>Secondary identifying numbers</td> <td></td> </tr> <tr> <td>Source(s) of monetary or material support</td> <td>Zhejiang Provincial Administration of Traditional Chinese Medicine</td> </tr> <tr> <td>Primary sponsor</td> <td>Zhejiang Provincial Administration of Traditional Chinese Medicine</td> </tr> <tr> <td>Secondary sponsor(s)</td> <td></td> </tr> <tr> <td>Contact for public queries</td> <td>CZ[z985417@163.com],HFZ[zhuzhijie@163.com]</td> </tr> <tr> <td>Contact for scientific queries</td> <td>CZ,HFZ Department of Acupuncture and Moxibustion, the First Affiliated Hospital of Zhejiang Chinese Medical University, Hangzhou, China</td> </tr> <tr> <td>Public title</td> <td>Electroacupuncture at ‘four sacral points’ for the treatment of urinary incontinence after stroke</td> </tr> <tr> <td>Scientific title</td> <td>Comparison of efficacy and safety between electroacupuncture at ‘four sacral points’ and conventional electroacupuncture for the treatment of urinary incontinence after stroke: study protocol for a randomized controlled trial</td> </tr> <tr> <td>Countries of recruitment</td> <td>China</td> </tr> <tr> <td>Health condition(s) or problem(s) studied</td> <td>Acupuncture treatment; Urinary incontinence after stroke</td> </tr> </table> | Primary registry and trial identifying number | ChiCTR-IOR-17012847 | Date of registration in primary registry | 30 Sep 2017 | Secondary identifying numbers |  | Source(s) of monetary or material support | Zhejiang Provincial Administration of Traditional Chinese Medicine | Primary sponsor | Zhejiang Provincial Administration of Traditional Chinese Medicine | Secondary sponsor(s) |  | Contact for public queries | CZ[z985417@163.com],HFZ[zhuzhijie@163.com] | Contact for scientific queries | CZ,HFZ Department of Acupuncture and Moxibustion, the First Affiliated Hospital of Zhejiang Chinese Medical University, Hangzhou, China | Public title | Electroacupuncture at ‘four sacral points’ for the treatment of urinary incontinence after stroke | Scientific title | Comparison of efficacy and safety between electroacupuncture at ‘four sacral points’ and conventional electroacupuncture for the treatment of urinary incontinence after stroke: study protocol for a randomized controlled trial | Countries of recruitment | China | Health condition(s) or problem(s) studied | Acupuncture treatment; Urinary incontinence after stroke |
| Primary registry and trial identifying number | ChiCTR-IOR-17012847                                                                                                                                                                                                               |                                                                                                                                                                                                                                                                                                                                                                                                                                                                                                                                                                                                                                                                                                                                                                                                                                                                                                                                                                                                                                                                                                                                                                                                                                                                                                                                                                                                                                                                                                                      |                                               |                     |                                          |             |                               |  |                                           |                                                                    |                 |                                                                    |                      |  |                            |                                            |                                |                                                                                                                                         |              |                                                                                                   |                  |                                                                                                                                                                                                                                   |                          |       |                                           |                                                          |
| Date of registration in primary registry      | 30 Sep 2017                                                                                                                                                                                                                       |                                                                                                                                                                                                                                                                                                                                                                                                                                                                                                                                                                                                                                                                                                                                                                                                                                                                                                                                                                                                                                                                                                                                                                                                                                                                                                                                                                                                                                                                                                                      |                                               |                     |                                          |             |                               |  |                                           |                                                                    |                 |                                                                    |                      |  |                            |                                            |                                |                                                                                                                                         |              |                                                                                                   |                  |                                                                                                                                                                                                                                   |                          |       |                                           |                                                          |
| Secondary identifying numbers                 |                                                                                                                                                                                                                                   |                                                                                                                                                                                                                                                                                                                                                                                                                                                                                                                                                                                                                                                                                                                                                                                                                                                                                                                                                                                                                                                                                                                                                                                                                                                                                                                                                                                                                                                                                                                      |                                               |                     |                                          |             |                               |  |                                           |                                                                    |                 |                                                                    |                      |  |                            |                                            |                                |                                                                                                                                         |              |                                                                                                   |                  |                                                                                                                                                                                                                                   |                          |       |                                           |                                                          |
| Source(s) of monetary or material support     | Zhejiang Provincial Administration of Traditional Chinese Medicine                                                                                                                                                                |                                                                                                                                                                                                                                                                                                                                                                                                                                                                                                                                                                                                                                                                                                                                                                                                                                                                                                                                                                                                                                                                                                                                                                                                                                                                                                                                                                                                                                                                                                                      |                                               |                     |                                          |             |                               |  |                                           |                                                                    |                 |                                                                    |                      |  |                            |                                            |                                |                                                                                                                                         |              |                                                                                                   |                  |                                                                                                                                                                                                                                   |                          |       |                                           |                                                          |
| Primary sponsor                               | Zhejiang Provincial Administration of Traditional Chinese Medicine                                                                                                                                                                |                                                                                                                                                                                                                                                                                                                                                                                                                                                                                                                                                                                                                                                                                                                                                                                                                                                                                                                                                                                                                                                                                                                                                                                                                                                                                                                                                                                                                                                                                                                      |                                               |                     |                                          |             |                               |  |                                           |                                                                    |                 |                                                                    |                      |  |                            |                                            |                                |                                                                                                                                         |              |                                                                                                   |                  |                                                                                                                                                                                                                                   |                          |       |                                           |                                                          |
| Secondary sponsor(s)                          |                                                                                                                                                                                                                                   |                                                                                                                                                                                                                                                                                                                                                                                                                                                                                                                                                                                                                                                                                                                                                                                                                                                                                                                                                                                                                                                                                                                                                                                                                                                                                                                                                                                                                                                                                                                      |                                               |                     |                                          |             |                               |  |                                           |                                                                    |                 |                                                                    |                      |  |                            |                                            |                                |                                                                                                                                         |              |                                                                                                   |                  |                                                                                                                                                                                                                                   |                          |       |                                           |                                                          |
| Contact for public queries                    | CZ[z985417@163.com],HFZ[zhuzhijie@163.com]                                                                                                                                                                                        |                                                                                                                                                                                                                                                                                                                                                                                                                                                                                                                                                                                                                                                                                                                                                                                                                                                                                                                                                                                                                                                                                                                                                                                                                                                                                                                                                                                                                                                                                                                      |                                               |                     |                                          |             |                               |  |                                           |                                                                    |                 |                                                                    |                      |  |                            |                                            |                                |                                                                                                                                         |              |                                                                                                   |                  |                                                                                                                                                                                                                                   |                          |       |                                           |                                                          |
| Contact for scientific queries                | CZ,HFZ Department of Acupuncture and Moxibustion, the First Affiliated Hospital of Zhejiang Chinese Medical University, Hangzhou, China                                                                                           |                                                                                                                                                                                                                                                                                                                                                                                                                                                                                                                                                                                                                                                                                                                                                                                                                                                                                                                                                                                                                                                                                                                                                                                                                                                                                                                                                                                                                                                                                                                      |                                               |                     |                                          |             |                               |  |                                           |                                                                    |                 |                                                                    |                      |  |                            |                                            |                                |                                                                                                                                         |              |                                                                                                   |                  |                                                                                                                                                                                                                                   |                          |       |                                           |                                                          |
| Public title                                  | Electroacupuncture at ‘four sacral points’ for the treatment of urinary incontinence after stroke                                                                                                                                 |                                                                                                                                                                                                                                                                                                                                                                                                                                                                                                                                                                                                                                                                                                                                                                                                                                                                                                                                                                                                                                                                                                                                                                                                                                                                                                                                                                                                                                                                                                                      |                                               |                     |                                          |             |                               |  |                                           |                                                                    |                 |                                                                    |                      |  |                            |                                            |                                |                                                                                                                                         |              |                                                                                                   |                  |                                                                                                                                                                                                                                   |                          |       |                                           |                                                          |
| Scientific title                              | Comparison of efficacy and safety between electroacupuncture at ‘four sacral points’ and conventional electroacupuncture for the treatment of urinary incontinence after stroke: study protocol for a randomized controlled trial |                                                                                                                                                                                                                                                                                                                                                                                                                                                                                                                                                                                                                                                                                                                                                                                                                                                                                                                                                                                                                                                                                                                                                                                                                                                                                                                                                                                                                                                                                                                      |                                               |                     |                                          |             |                               |  |                                           |                                                                    |                 |                                                                    |                      |  |                            |                                            |                                |                                                                                                                                         |              |                                                                                                   |                  |                                                                                                                                                                                                                                   |                          |       |                                           |                                                          |
| Countries of recruitment                      | China                                                                                                                                                                                                                             |                                                                                                                                                                                                                                                                                                                                                                                                                                                                                                                                                                                                                                                                                                                                                                                                                                                                                                                                                                                                                                                                                                                                                                                                                                                                                                                                                                                                                                                                                                                      |                                               |                     |                                          |             |                               |  |                                           |                                                                    |                 |                                                                    |                      |  |                            |                                            |                                |                                                                                                                                         |              |                                                                                                   |                  |                                                                                                                                                                                                                                   |                          |       |                                           |                                                          |
| Health condition(s) or problem(s) studied     | Acupuncture treatment; Urinary incontinence after stroke                                                                                                                                                                          |                                                                                                                                                                                                                                                                                                                                                                                                                                                                                                                                                                                                                                                                                                                                                                                                                                                                                                                                                                                                                                                                                                                                                                                                                                                                                                                                                                                                                                                                                                                      |                                               |                     |                                          |             |                               |  |                                           |                                                                    |                 |                                                                    |                      |  |                            |                                            |                                |                                                                                                                                         |              |                                                                                                   |                  |                                                                                                                                                                                                                                   |                          |       |                                           |                                                          |

1  
2  
3  
4  
5  
6  
7  
8  
9  
10  
11  
12  
13  
14  
15  
16  
17  
18  
19  
20  
21  
22  
23  
24  
25  
26  
27  
28  
29  
30  
31  
32  
33  
34  
35  
36  
37  
38  
39  
40  
41  
42  
43  
44  
45  
46  
47

|                                      |                                                                                                                                                                                                                                                                                                                                                                                                                                                                                                                                                                                                                                                                                                                                                                                                                                                                                                                                                                                                                                                                                                                                                                     |
|--------------------------------------|---------------------------------------------------------------------------------------------------------------------------------------------------------------------------------------------------------------------------------------------------------------------------------------------------------------------------------------------------------------------------------------------------------------------------------------------------------------------------------------------------------------------------------------------------------------------------------------------------------------------------------------------------------------------------------------------------------------------------------------------------------------------------------------------------------------------------------------------------------------------------------------------------------------------------------------------------------------------------------------------------------------------------------------------------------------------------------------------------------------------------------------------------------------------|
| Intervention(s)                      | Treatment group: electroacupuncture at ‘four sacral points’<br>Control group: conventional electroacupuncture                                                                                                                                                                                                                                                                                                                                                                                                                                                                                                                                                                                                                                                                                                                                                                                                                                                                                                                                                                                                                                                       |
| Key inclusion and exclusion criteria | Ages eligible for study: 30-85 years old; Sexes eligible for study: both;<br>Accepts healthy volunteers: no.<br>Inclusion criteria:<br>Male or female patients aged 30–85 years;<br>Diagnosis of post-stroke UI in accordance with the criteria of the American Stroke Association and the International Continence Society;<br>Inpatients or outpatients with a post-stroke interval of 4 weeks to 2 years;<br>Stable vital signs, normal consciousness, and compliance with treatment;<br>Refractoriness to medications (patients who have taken antimuscarinic agents with no UI improvement);<br>Provision of written informed consent.<br>Exclusion criteria: UI caused by other diseases such as Parkinson’s disease, multiple sclerosis, spinal injury, or Alzheimer’s disease; Pre-stroke UI, SUI or mixed UI, overflow incontinence;<br>Urinary retention concomitant with UI;<br>Urethral injury, lower urinary tract obstruction, acute urinary tract infection, refractory urinary tract infection, hydronephrosis, urological calculi, or tumours;<br>Severe cognitive impairment, as defined by a Mini-Mental State Examination (MMSE) score of <22 ; |

|                               |                         |                                                                                                                                                                                                                                                                                                                                                                                                                                                                                                                                                                                                                                            |
|-------------------------------|-------------------------|--------------------------------------------------------------------------------------------------------------------------------------------------------------------------------------------------------------------------------------------------------------------------------------------------------------------------------------------------------------------------------------------------------------------------------------------------------------------------------------------------------------------------------------------------------------------------------------------------------------------------------------------|
|                               |                         | Insufficiency of the heart, lungs, liver, and/or kidneys; Presence of an implantable electronic device                                                                                                                                                                                                                                                                                                                                                                                                                                                                                                                                     |
|                               | Study type              | Interventional                                                                                                                                                                                                                                                                                                                                                                                                                                                                                                                                                                                                                             |
|                               |                         | Allocation: randomized; Intervention model: parallel assignment; Masking: blinded assessment and analysis.                                                                                                                                                                                                                                                                                                                                                                                                                                                                                                                                 |
|                               |                         | Primary purpose: treatment                                                                                                                                                                                                                                                                                                                                                                                                                                                                                                                                                                                                                 |
|                               | Date of first enrolment | Hasn't started                                                                                                                                                                                                                                                                                                                                                                                                                                                                                                                                                                                                                             |
|                               | Target sample size      | 140                                                                                                                                                                                                                                                                                                                                                                                                                                                                                                                                                                                                                                        |
|                               | Recruitment status      | Hasn't started                                                                                                                                                                                                                                                                                                                                                                                                                                                                                                                                                                                                                             |
|                               | Primary outcome(s)      | The incontinent episode diary                                                                                                                                                                                                                                                                                                                                                                                                                                                                                                                                                                                                              |
|                               | Key secondary outcomes  | International Consultation on Incontinence Questionnaire Urinary Incontinence – Short Form (ICIQ-UI SF); Barthel Activities of Daily Living Index (Barthel ADL Index)                                                                                                                                                                                                                                                                                                                                                                                                                                                                      |
| Protocol version              | 3                       | Issue date: 30 Sep 2017                                                                                                                                                                                                                                                                                                                                                                                                                                                                                                                                                                                                                    |
|                               |                         | Protocol amendment number: 01                                                                                                                                                                                                                                                                                                                                                                                                                                                                                                                                                                                                              |
|                               |                         | Authors: Chen Shan; Siyou Wang; Lihua Xuan, Hanti Lu, Zhikai Hu, Chao Zhang, Huifang Zhang <sup>1</sup>                                                                                                                                                                                                                                                                                                                                                                                                                                                                                                                                    |
| Funding                       | 4                       | This work has been supported Zhejiang Provincial Administration of Traditional Chinese Medicine (grant number 2018ZA045).                                                                                                                                                                                                                                                                                                                                                                                                                                                                                                                  |
| Roles and responsibilities 5a |                         | SC[No. 9 the Ninth Street, Xiasha Economic and Technological Zone, Department of Acupuncture and Moxibustion, the First Affiliated Hospital of Zhejiang Chinese Medical University, Hangzhou, China]; SYW[No. 650 Wanpin Road, Clinical Research Section, Shanghai Research Institute of Acupuncture and Meridian, Shanghai, China]; LHX[No. 54 Youdian Road, Department of Acupuncture and Moxibustion, the First Affiliated Hospital of Zhejiang Chinese Medical University, Hangzhou, China]; HTL[No. 54 Youdian Road, Clinical Evaluation and Analysis Center of the First Affiliated Hospital of Zhejiang Chinese Medical University, |

1  
2  
3  
4  
5  
6  
7  
8  
9  
10  
11  
12  
13  
14  
15  
16  
17  
18  
19  
20  
21  
22  
23  
24  
25  
26  
27  
28  
29  
30  
31  
32  
33  
34  
35  
36  
37  
38  
39  
40  
41  
42  
43  
44  
45  
46  
47

---

Hangzhou, China]; ZKH[No. 668 Jimei Avenue, Jimei District, Department of Computer Science, Huaqiao University, Xiamen, China]; CZ[No. 9 the Ninth Street, Xiasha Economic and Technological Zone, Rehabilitation Unit of the First Affiliated Hospital of Zhejiang Chinese Medical University, Hangzhou, China]; HFZ[No. 9 the Ninth Street, Xiasha Economic and Technological Zone, Department of Acupuncture and Moxibustion, the First Affiliated Hospital of Zhejiang Chinese Medical University, Hangzhou, China]

Contributors: SC conceived and wrote the protocol; SYW and LHX contributed to the study design; HTL contributed to the sample size calculation and wrote the statistical analysis plan; ZKH drew the flow charts; CZ and HFZ prepared the figures and tables. All authors have read and approved the final manuscript.<sup>17</sup>

---

5b Trial sponsor: Zhejiang Provincial Administration of Traditional Chinese Medicine<sup>18</sup>

---

Sponsor’s Reference: grant number 2018ZA045<sup>18</sup>

---

Contact name: Zhejiang Provincial Administration of Traditional Chinese Medicine

---

Address: No.216 Qingchun Road

---

Telephone: +86 0571 8770 9076

---

Email: zjtcn@zjwst.gov.cn

5c This funding source had no role in the design of this study and will not have any role during its execution, analyses, interpretation of the data, or decision to submit results.

5d Authors in the title page are members of the steering committee

---

**Introduction**

---

Background and rationale 6a Introduction: In a systematic review, a random-effects meta-analysis determined the prevalence of UI after stroke to be 23.6%. Physical consequences include skin dermatitis and urinary tract infections, while psychological consequences include embarrassment and low self-esteem. In addition, UI is a powerful prognostic indicator of survival and eventual functional dependence. The most recent research on this topic demonstrated a higher mortality rate for stroke patients with UI (56.8%) than

---

1  
2  
3  
4  
5  
6  
7 for stroke patients without UI (11.9%). Therefore, the management of UI after stroke is of great importance.  
8 Post-stroke UI may develop because of various reasons, although direct stroke-induced damage to the neuromicturition pathways is  
9 considered the most common cause. Typical symptoms include the involuntary leakage of urine accompanied or immediately  
10 preceded by urgency. Urodynamic evaluation often reveals uninhibited detrusor contraction.

11  
12 Evidence-based interventions for post-stroke UI include behavioural and pharmacological interventions, as well as individually  
13 tailored structured management plans, or the aid of continence nurse specialists, in order to promote continence. Trials of  
14 behavioural and pharmacological therapies have provided insufficient evidence to guide the management of post-stroke UI in  
15 adults. Furthermore, side effect profiles and anticholinergic burden should be considered before medications are prescribed.  
16 Neuromodulation therapies, which involve the electrical stimulation of target-specific nerves, are reportedly effective for overactive  
17 bladder (OAB) or urgency UI (UUI). Neuromodulation includes transvaginal or transanal electrical stimulation (TES),  
18 percutaneous tibial nerve stimulation (PTNS), sacral nerve neuromodulation (SNM), and pudendal nerve (PN) neuromodulation  
19 (PNM). TES is an easy procedure, but it is not tolerated by several patients because of discomfort, mucosal injury, and the necessity  
20 for high-intensity stimulation to achieve an acceptable outcome. SNM with the InterStim device provides continuous stimulation  
21 and close nerve contact; however, at least 20% of initially tested patients do not respond to the test procedure. The disadvantages of  
22 SNM include the invasiveness of the procedure, the high cost of treatment, the high rate of revision surgery, the requirement for  
23 device replacement on battery exhaustion, and adverse events (pain and infection). PNM with the Interstim device or the Bion  
24 device (selective PN stimulation) can be used to treat UUI refractory to SNM, although its disadvantages are similar to those of  
25 SNM. PTNS with needle electrodes is minimally invasive, effective, easy to perform, and well tolerated; however, its effect  
26 diminishes over time.

27  
28 On the basis of the theory of nerve stimulation, we developed electroacupuncture at ‘four sacral points’, also known as  
29 electroacupuncture neurostimulation therapy or electrical PN stimulation therapy. This approach involves the insertion of long  
30 needles at ‘four sacral points,’ with electricity to stimulate specific nerves under the sacral region. In our previous study, this  
31 treatment has been used to treat stress UI (SUI) in women, and radiographic evidence with simultaneous records of perineal  
32  
33  
34  
35  
36  
37  
38



1  
2  
3  
4  
5  
6  
7  
8  
9  
10  
11  
12  
13  
14  
15  
16  
17  
18  
19  
20  
21  
22  
23  
24  
25  
26  
27  
28  
29  
30  
31  
32  
33  
34  
35  
36  
37  
38  
39  
40  
41  
42  
43  
44  
45  
46  
47

---

ultrasonographic pelvic floor muscle (PFM) contraction, vaginal pressure, and pelvic floor surface electromyography have shown that it causes PN excitation. It has also been used for the treatment of female urgency-frequency syndrome, idiopathic urgency UI, and UI caused by neurological or non-neurological conditions. High quality study on electroacupuncture at ‘four sacral points’ for post-stroke UI need to be conducted for a better management of UI after stroke.<sup>3-4</sup>

Treatment period: All participants will receive treatment every day from Monday to Friday. One course of treatment will comprise 10 sessions. The therapeutic effects will be evaluated after the completion of two treatment courses (4 weeks).<sup>9</sup>

---

6b The principle of acupuncture treatment for UI is to promote the recovery of urine control. Acupoints on the lower abdomen, such as CV4 (Guanyuan), CV6 (Qihai), and ST28 (Shuidao), as well as those on the sacral region, such as BL32 (Ciliao), BL33 (Zhongliao), and BL 35 (Huiyang), are generally selected for the regulation of the bladder voiding function. A literature review showed that acupuncture demonstrated more favourable effects than did antimuscarinic drugs for the treatment of OAB and alleviation of symptoms in some comparative trials.<sup>4</sup>

---

Objectives 7 The mechanism of action of electroacupuncture at ‘four sacral points’ for post-stroke UI can be explained by the modulation of reflex pathways at spinal or supraspinal levels. Electrical stimulation of the afferent branches of the PN can induce strong inhibition of the micturition reflex and detrusor hyper-reflexia, resulting in the effective treatment of post-stroke UI.<sup>4</sup>

---

Trial design 8 It is designed as a blinded randomized assessment and analysis with two parallel groups over a 4-week treatment period. Randomization will be performed in a random 1:1 allocation sequence.<sup>5</sup>

---

**Methods: Participants, interventions, and outcomes**

---

Study setting 9 Eligible participants will be recruited from the inpatient and outpatient departments of the First Affiliated Hospital of Zhejiang Chinese Medical University<sup>5</sup>

---

Eligibility criteria 10 Inclusion Criteria

1. Male or female patients aged 30–85 years
2. Diagnosis of post-stroke UI in accordance with the criteria of the American Stroke Association and the International Continence

---

---

Society

3. Inpatients or outpatients with a post-stroke interval of 4 weeks to 2 years
4. Stable vital signs, normal consciousness, and compliance with treatment
5. Refractoriness to medications( patients who have taken antimuscarinic agents with no UI improvement)
6. Provision of written informed consent

Exclusion Criteria

1. UI caused by other diseases such as Parkinson's disease, multiple sclerosis, spinal injury, or Alzheimer's disease
2. Pre-stroke UI, SUI or mixed UI, or overflow incontinence.
3. Urinary retention concomitant with UI
4. Urethral injury, lower urinary tract obstruction, acute urinary tract infection, refractory urinary tract infection, hydronephrosis, urological calculi, or tumours
5. Severe cognitive impairment, as defined by a Mini-Mental State Examination (MMSE) score of <22
6. Insufficiency of the heart, lungs, liver, and/or kidneys
7. Presence of an implantable electronic device<sup>6-7</sup>

Eligibility criteria for acupuncturists and training

All of the study-related treatments will be provided by certified and skilled acupuncturists who will strictly follow the detailed procedures for each group.<sup>7</sup>

---

|               |     |                                                                                                                                                                                                                                                                                                                                                                                                                                                                                                                                                                                                                                                        |
|---------------|-----|--------------------------------------------------------------------------------------------------------------------------------------------------------------------------------------------------------------------------------------------------------------------------------------------------------------------------------------------------------------------------------------------------------------------------------------------------------------------------------------------------------------------------------------------------------------------------------------------------------------------------------------------------------|
| Interventions | 11a | <p>Treatment group: Participants in this group will receive electroacupuncture at 'four sacral points'.</p> <p>a. Selection of points: Four sacral points (Figure 2 and Figure 3) are selected. The two upper points are located on either side of the sacrococcygeal joint, approximately 1 cm from the joint. The two lower points are located on either side of the tip of the coccyx, approximately 1 cm from the coccyx. Acupuncture will be performed at LI15 (Jianyu), LI11 (Quchi), LI10 (Shousanli), SJ5 (Waiguan), and LI4 (Hegu) for participants with upper limb paralysis. For participants with lower limb paralysis, ST31 (Biguan),</p> |
|---------------|-----|--------------------------------------------------------------------------------------------------------------------------------------------------------------------------------------------------------------------------------------------------------------------------------------------------------------------------------------------------------------------------------------------------------------------------------------------------------------------------------------------------------------------------------------------------------------------------------------------------------------------------------------------------------|

---

---

ST34 (Liangqiu), SP10 (Xuehai), SP9 (Yinlingquan), GB39 (Xuanzhong), GB40 (Qiuxu), and LR3 (Taichong) will also be used. GB20 (Fengchi), SJ17 (Yifeng), and GB12 (Wangu) will be used for participants with dysphagia, with the additional use of ST4 (Dicang), ST6 (Jiache), and LI20 (Yingxiang) for participants with facial paralysis and drooling.

b. Detailed procedure: At the upper sacral points, a needle (Suzhou Shenlong Medical Apparatus Factory, Suzhou, China) measuring  $0.40 \times 100$  mm will be inserted perpendicularly to a depth of 80–90 mm to induce a sensation referred to the urethra or anus via stimulation of the main trunk of the PN. At the lower sacral points, a needle measuring  $0.40 \times 100$  or  $0.40 \times 125$  mm will be inserted obliquely toward the ischiorectal fossa to a depth of 90–110 mm to induce a sensation referred to the urethra via stimulation of the perineal nerve (Figure 4). Once the sensation is induced in the respective regions, two pairs of electrodes from the G6805-A electroacupuncture device (Shantou Medical equipment factory, Shantou, China) will be connected to the two ipsilaterally inserted needles, with the anode connected to the upper needle and the cathode connected to the lower needle. The device will be set to produce electrical stimulation (biphasic 2-ms pulse duration) at a frequency of 2.0 Hz and a moderate intensity of 25–35 mA. Electrostimulation will be performed for 20 min during each treatment. PFM contraction around the urethra (often comfortable) must be maintained during the entire electrostimulation procedure. Conventional acupuncture without electricity will be applied for 20 min at the remaining acupoints.

Control group: Participants in this group will receive conventional electroacupuncture.

a. Selection of points: Abdominal points CV6 (Qihai), CV4 (Guanyuan), and ST28 (Shuidao, both sides), corresponding to the conventional electroacupuncture treatment of UI. The point selection procedure for participants with upper or lower limb paralysis, facial paralysis, and/or dysphagia will be the same as that used for the treatment group.

b. Detailed procedure: At CV6 (Qihai), CV4 (Guanyuan), and ST28 (Shuidao), a needle measuring  $0.25 \times 40$  mm will be inserted perpendicularly to a depth of 25–40 mm to induce a local sensation (distention or sourness). Subsequently, the electrodes from the G6805-A electroacupuncture device will be connected to the needles at these points with the anode connected to ST28 and the cathode connected to CV6 and CV4. The device will be set to produce electrical stimulation (biphasic 2-ms pulse duration) at a frequency of 2.0 Hz and a moderate intensity that is tolerable by the participants. Electrostimulation will be performed for 20 min

---

|          |     |                                                                                                                                                                                                                                                                                                                                                                                                                                                                                                                                                                                                                                                            |
|----------|-----|------------------------------------------------------------------------------------------------------------------------------------------------------------------------------------------------------------------------------------------------------------------------------------------------------------------------------------------------------------------------------------------------------------------------------------------------------------------------------------------------------------------------------------------------------------------------------------------------------------------------------------------------------------|
|          |     | during each treatment. Conventional acupuncture without electricity will be applied for 20 min at the remaining acupoints.<br>Treatment period: All participants will receive treatment every day from Monday to Friday. One course of treatment will comprise 10 sessions. The therapeutic effects will be evaluated after the completion of two treatment courses (4 weeks). <sup>8-9</sup>                                                                                                                                                                                                                                                              |
|          | 11b | <p>Elimination criteria</p> <ol style="list-style-type: none"> <li>1. Inclusion despite non-fulfilment of the inclusion criteria</li> <li>2. Lack of exclusion despite fulfilment of the exclusion criteria</li> <li>3. Eligible participants who receive no interventions</li> </ol> <p>Dropout criteria</p> <ol style="list-style-type: none"> <li>1. Poor participant compliance (lack of adherence to treatment for personal reasons)</li> <li>2. Serious adverse events (SAE), complications, or special physiological changes necessitating discontinuation of the intervention</li> <li>3. Voluntary dropout<sup>7</sup></li> </ol>                 |
|          | 11c | In order to improve adherence, health education about the importance of UI management will be conducted by a special nurse and brochures on post-stroke UI will be provided to patients. <sup>17</sup>                                                                                                                                                                                                                                                                                                                                                                                                                                                     |
|          | 11d | All participants will receive routine medical care for stroke recovery, including the control of blood pressure, blood sugar, and blood lipids and routine rehabilitation training.<br>During the treatment course and 24-week follow-up time, the administration of antimuscarinic agents and other drugs for neurogenic detrusor overactivity is prohibited for all the patients. They are also not permitted to receive other acupuncture treatment or physiotherapy for UI. All of the study-related treatments will be provided by certified and skilled acupuncturists who will strictly follow the detailed procedures for each group. <sup>7</sup> |
| Outcomes | 12  | <p>Primary outcome measures</p> <p>The incontinent episode diary</p> <p>The incontinent episode diary (Table 1) will be used to derive the primary outcome measure. The number of incontinent episodes will be recorded by the participants over a period of 3 days at baseline. A template will be provided for patient use. This data will</p>                                                                                                                                                                                                                                                                                                           |

1  
2  
3  
4  
5  
6  
7  
8  
9  
10  
11  
12  
13  
14  
15  
16  
17  
18  
19  
20  
21  
22  
23  
24  
25  
26  
27  
28  
29  
30  
31  
32  
33  
34  
35  
36  
37  
38  
39  
40  
41  
42  
43  
44  
45  
46  
47

---

be recorded again at the end of treatment.

Secondary outcome measures

- 1. International Consultation on Incontinence Questionnaire Urinary Incontinence – Short Form (ICIQ-UI SF) (Table 2)
- 2. Barthel Activities of Daily Living Index (Barthel ADL Index) (Table 3)

The ICIQ-UI SF is used in research and clinical practice worldwide. It is a brief and psychometrically robust patient-completed questionnaire for evaluating the frequency and severity of UI in men and women and its impact on quality of life (QoL). The ICIQ-UI SF score ranges from 0 to 21. The Barthel ADL Index is a 10-item measure of activities of daily living (ADL) that is frequently used in clinical practice and as a trial outcome measure in stroke medicine. It is used to assess baseline abilities to quantify functional changes, including UI, after rehabilitation in stroke patients.

The above outcome measures will be assessed at baseline and at 4 and 28 weeks after baseline.<sup>9-10</sup>

---

|                      |    |                                                                                                                                                                                                                                                                                                                                                                                                                                                                                                                                                                                                                                                                                                                                    |
|----------------------|----|------------------------------------------------------------------------------------------------------------------------------------------------------------------------------------------------------------------------------------------------------------------------------------------------------------------------------------------------------------------------------------------------------------------------------------------------------------------------------------------------------------------------------------------------------------------------------------------------------------------------------------------------------------------------------------------------------------------------------------|
| Participant timeline | 13 | A total of 140 eligible participants will be recruited from the inpatient and outpatient departments of the First Affiliated Hospital of Zhejiang Chinese Medical University according to the inclusion and exclusion criteria. At the beginning of recruitment, detailed information about the study, including the research objective, study procedure, and potential benefits and risks, will be provided to all eligible patients. If the patient agrees to participate, he or she will be asked to sign a written informed consent form. This will be followed by baseline assessment and randomization. A treatment period of 4 weeks and a follow-up period of 24 weeks will follow the recruitment procedure. <sup>5</sup> |
|----------------------|----|------------------------------------------------------------------------------------------------------------------------------------------------------------------------------------------------------------------------------------------------------------------------------------------------------------------------------------------------------------------------------------------------------------------------------------------------------------------------------------------------------------------------------------------------------------------------------------------------------------------------------------------------------------------------------------------------------------------------------------|

Figure1

---

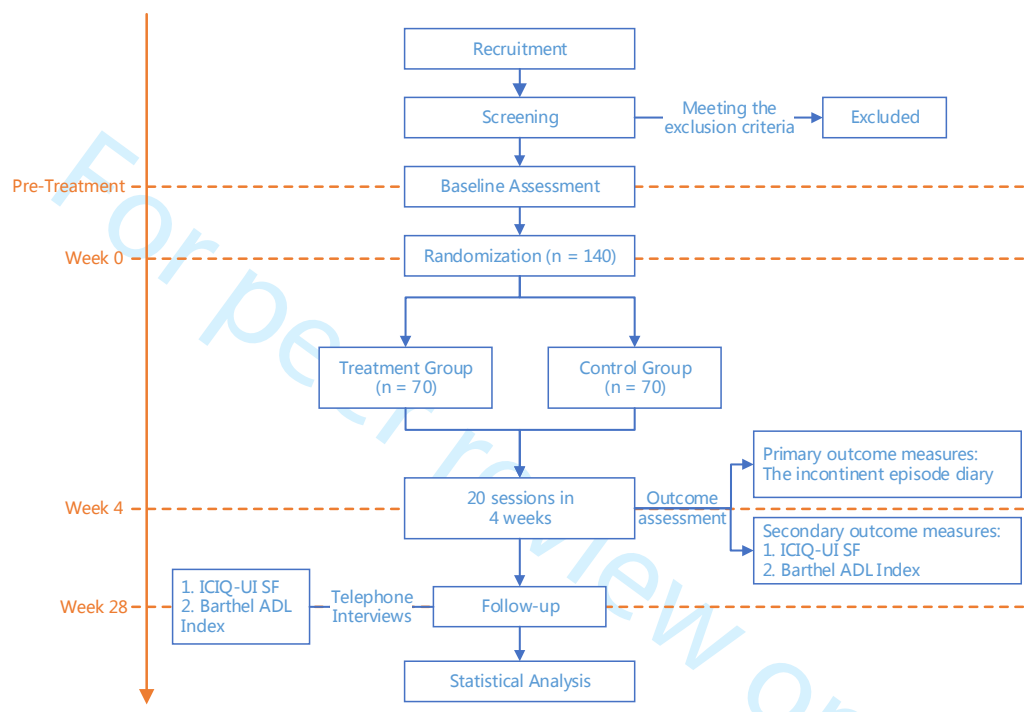

|             |    |                                                                                                                                                                                                                                                                                                                                                                               |
|-------------|----|-------------------------------------------------------------------------------------------------------------------------------------------------------------------------------------------------------------------------------------------------------------------------------------------------------------------------------------------------------------------------------|
| Sample size | 14 | With reference to a similar study with 120 women (efficacy rate, 70.1%:45%), the sample size has been calculated, using PASS 11 software, as 120 patients for a power (1-beta) of 0.80, an alpha (significance level) of 0.05, and a ratio of 1:1. With consideration of the estimated dropout rate (15%), the total sample size will be 140 (70 in each group). <sup>6</sup> |
| Recruitment | 15 | The neurology department of the First Affiliated Hospital of Zhejiang Chinese Medical University has the major source of patients with post-stroke UI. Our reach team includes neurological physicians and special nurses who will interview potentially eligible                                                                                                             |

patients. Advertisements will be released through health education brochures, posters, and videos displayed in the outpatient and inpatient sites of the First Affiliated Hospital of Zhejiang Chinese Medical University. Recruitment information will also be issued through media (e.g. newspapers, broadcasts, and websites) <sup>5</sup>

**Methods: Assignment of interventions**

Administrative Information

Allocation:

Sequence generation 16a The randomization scheme has been created by the Clinical Evaluation and Analysis Center of the First Affiliated Hospital of Zhejiang Chinese Medical University, where professionals used SPSS Statistics 22.0 to generate a random 1:1 allocation sequence using a computer.<sup>5-6</sup>

Allocation concealment mechanism 16b Professionals involved in allocation will not be recruited in the study. The random allocation is strictly kept in an opaque envelope and is inaccessible to other research staff. After baseline assessment, the envelope will be opened by an independent staff member in the participant’s presence, in order to determine the group assignment for that participant.<sup>6</sup>

Implementation 16c All patients who give consent for participation and who fulfil the inclusion criteria will be assigned to a group randomly. Randomisation will be requested by the staff member responsible for recruitment and clinical interviews from the First Affiliated Hospital of Zhejiang Chinese Medical University. An independent staff member will open an envelope with printed randomisation numbers in the participant’s presence. The therapists will be informed about the participant’s allocation at the same time. The staff member responsible for recruitment and clinical interviews is not allowed to receive information about the group allocation.<sup>6</sup>

Blinding 17a Considering the nature of acupuncture, therapists and participants cannot be blinded to the treatment allocation. Data managers and statisticians will be blinded throughout the trial. Telephone interviewers who collect follow-up information will also be blinded. Data managers, statisticians, and telephone interviewers are restricted from discussing the treatment allocations with each other. The therapists will not be permitted to communicate with any data managers, statisticians, or telephone interviewers.<sup>6</sup>

17b If an unblinding event occurs among data managers, statisticians, or telephone interviewers, the relevant work will be transferred to

other appropriately blinded data managers, statisticians, or telephone interviewers. The Investigator must report all code breaks (with reason) as they occur on the corresponding CRF page.<sup>6</sup>

---

### Methods: Data collection, management and analysis

---

|                        |     |                                                                                                                                                                                                                                                                                                                                                                                                                                                                                                                                                                                                                                                                                                                                                                                                                                                                                                                                                                                                                                                                            |
|------------------------|-----|----------------------------------------------------------------------------------------------------------------------------------------------------------------------------------------------------------------------------------------------------------------------------------------------------------------------------------------------------------------------------------------------------------------------------------------------------------------------------------------------------------------------------------------------------------------------------------------------------------------------------------------------------------------------------------------------------------------------------------------------------------------------------------------------------------------------------------------------------------------------------------------------------------------------------------------------------------------------------------------------------------------------------------------------------------------------------|
| Data collection method | 18a | A research assistant will record the baseline characteristics of all participants. Trained caregivers will record the frequency of UI at baseline and at 4 weeks after baseline. A researcher who remains blinded to treatment group allocation will collect data regarding the frequency of UI and the weight of pads from the caregivers. The participants will also complete ICIQ-UI SF and the Barthel ADL Index at baseline and at 4 weeks after baseline. A blinded telephone interviewer will interview the participants and collect data pertaining to ICIQ-UI SF and the Barthel ADL Index at 28 weeks after baseline. All data will be recorded on the CRFs. After the completion of the CRFs, two independent researchers blinded to the group allocation will separately input data into an Excel spreadsheet. Another independent supervisor will check the two datasets for consistency. If conflicting data entries are discovered, the supervisor will compare the datasets with the original CRFs and mark the modification on the CRFs. <sup>14-15</sup> |
|                        | 18b | For participants who discontinue treatment early, we will use last observation carried forward analysis to handle the missing data, which means we will input outcome data of patients who lost follow-up to our analysis. <sup>15</sup>                                                                                                                                                                                                                                                                                                                                                                                                                                                                                                                                                                                                                                                                                                                                                                                                                                   |
| Data management        | 19  | The principal investigator of the research team will have the access to all documents and will protect the electronic documents with a password and create backups of all documents. The First Affiliated Hospital of Zhejiang Chinese Medical University will be responsible for the storage and management of all data. <sup>15</sup>                                                                                                                                                                                                                                                                                                                                                                                                                                                                                                                                                                                                                                                                                                                                    |
| Statistical methods    | 20a | All statistical analyses will be performed by a statistician from the Clinical Evaluation and Analysis Center of The First Affiliated Hospital of Zhejiang Chinese Medical University using SPSS Statistics 22.0. A normality test will be used to determine whether the data are normally distributed. Continuous variables with a normal distribution will be expressed as means $\pm$ standard deviations (SDs). Continuous variables with a non-normal distribution or ordinal variables will be expressed as medians (with lower, upper quartiles). Categorical variables will be summarized as counts and proportions. A Student's t-test will be used if the primary and secondary outcome measures conform to normal distribution. A paired t-test will be used to compare pre-treatment and                                                                                                                                                                                                                                                                       |



1  
2  
3  
4  
5  
6  
7  
8  
9  
10  
11  
12  
13  
14  
15  
16  
17  
18  
19  
20  
21  
22  
23  
24  
25  
26  
27  
28  
29  
30  
31  
32  
33  
34  
35  
36  
37  
38  
39  
40  
41  
42  
43  
44  
45  
46  
47

---

post-treatment UI occurrence for the primary outcome measure and pre-treatment and post-treatment scores in the secondary outcome measures. The independent sample t-test will be used to compare the difference between two groups for primary and secondary outcome measures. A Wilcoxon signed rank test will be used if the primary and secondary outcome measures conform to abnormal distribution. A Wilcoxon paired test will be used to compare pre-treatment and post-treatment UI occurrence for the primary outcome measure and pre-treatment and post-treatment scores in secondary outcome measures. The inter-group rank sum test will be used to compare the difference between two groups for primary and secondary outcome measures. All reported P-values will be two-sided, and confidence intervals (CI) will be at the 95% level. A P-value of <0.05 will be considered statistically significant.<sup>15-16</sup>

---

20b ANCOVA (analysis of covariance) will be used if there is imbalance in the baseline characteristics and outcome measures.<sup>15</sup>

---

20c For participants who discontinue treatment early, we will use last observation carried forward analysis to handle the missing data, meaning that we will input outcome data of patients who are lost to follow-up in our analysis.<sup>15</sup>

---

**Methods: Monitoring**

---

Data monitoring      21a      An independent data monitoring committee (DMC) is made up of members from Clinical Evaluation and Analysis Center of The First Affiliated Hospital of Zhejiang Chinese Medical University. The DMC, blinded to the treatment allocations, will meet regularly to monitor the study data.<sup>15</sup>

---

21b      The DMC will also perform interim-analysis when 50% of patients have been randomised and have completed the primary outcome measurement.<sup>15</sup>

---

Harms                      22      Adverse events (AEs)

An adverse event of acupuncture is defined as symptoms or diseases that are against the purpose of the treatment during or following the acupuncture treatment. The research staff will record the blood pressure, heart rate, heart rhythm, and respiration rate and observe changes in the consciousness of all participants before and after the treatment. The description of AEs, time of occurrence, location of the reaction, level of severity, corresponding management, and the necessity for patient withdrawal from the

---

trial will be recorded on the Case Report Forms (CRFs). AEs of acupuncture will be classified according to their location as local and systemic reactions.

Local reactions:

Subcutaneous haematoma

Minor bleeding on withdrawal of the needle

Subcutaneous bruise

Pain in the punctured region after treatment

Skin allergy in the punctured region after treatment

Local infection

Systemic reactions:

Acupuncture fainting

Abdominal distention

Dizziness or vertigo

Leg weakness

Muscle spasm

Systemic allergy

Systemic infection

Organ injury

Severe AEs are defined as symptoms or diseases that result in hospitalization or prolong hospitalization, disability, a life-threatening situation, or even death. Systemic infection and organ injury are two major AEs. Severe AEs will be reported to the Ethics Committee within 24 h. The Ethics Committee will provide medical suggestions for the research team and decide whether the patient should continue the ongoing treatment.<sup>14</sup>

|          |    |                                                                                                                                                                |
|----------|----|----------------------------------------------------------------------------------------------------------------------------------------------------------------|
| Auditing | 23 | The First Affiliated Hospital of Zhejiang Chinese Medical University will audit this study mainly for participant enrolment, consent, and costs. <sup>15</sup> |
|----------|----|----------------------------------------------------------------------------------------------------------------------------------------------------------------|

### **Ethics and dissemination**

|                          |    |                          |
|--------------------------|----|--------------------------|
| Research ethics approval | 24 | Research ethics approval |
|--------------------------|----|--------------------------|

|                               |     |                                                                                                                                                                                                                                                                                                                                                                                              |
|-------------------------------|-----|----------------------------------------------------------------------------------------------------------------------------------------------------------------------------------------------------------------------------------------------------------------------------------------------------------------------------------------------------------------------------------------------|
|                               |     | The Ethics Committee of the First Affiliated Hospital of Zhejiang Chinese Medical University has reviewed and approved this protocol (approval No. 2018-K-059-01). This study will adhere to the principles of the Declaration of Helsinki. <sup>16</sup>                                                                                                                                    |
| Protocol amendments           | 25  | Modification of the protocol<br>Any modifications to the protocol, including changes of study objectives, study design, patient population, sample sizes, study procedures, or significant administrative aspects, will require a formal application to the Zhejiang Provincial Administration of Traditional Chinese Medicine as well as the Chinese clinical trial registry. <sup>16</sup> |
| Consent or assent             | 26a | At the beginning of recruitment, detailed information about the study, including the research objective, study procedure, and potential benefits and risks, will be provided to all eligible patients. If the patient agrees to participate, he or she will be asked to sign a written informed consent form. <sup>5</sup>                                                                   |
|                               | 26b | There are no additional consent provisions for collection and use of participant data and biological specimens in ancillary studies.                                                                                                                                                                                                                                                         |
| Confidentiality               | 27  | All study participants will be given an identification number throughout the trial to assure confidentiality. All participant information will be stored in locked cabinets with limited access. <sup>16</sup>                                                                                                                                                                               |
| Declaration of interests      | 28  | None.                                                                                                                                                                                                                                                                                                                                                                                        |
| Access to data                | 29  | The principal investigator of the research team will have the access to all documents. <sup>15</sup>                                                                                                                                                                                                                                                                                         |
| Ancillary and post-trial care | 30  | For patients having common adverse reactions, appropriate medical care will be given to ease local bleeding, irritation, bruising, and so on. For those who have severe reactions leading to organ injury, systematic infection, systematic allergy, and so on, compensation will be given to cover their medical costs by our research team. <sup>14</sup>                                  |
| Dissemination policy          | 31a | The results of this study will be published in open-access and peer-reviewed journals and presented at relevant conferences. <sup>16</sup>                                                                                                                                                                                                                                                   |
|                               | 31b | SC conceived and wrote the protocol; SYW and LHX contributed to the study design; HTL contributed to the sample size calculation and wrote the statistical analysis plan; ZKH drew the flow charts; CZ and HFZ prepared the figures and tables. All authors have read and approved the final manuscript. <sup>17</sup>                                                                       |
|                               | 31c | The initial data will be accessible via Research Manager (ResMan). <sup>16</sup>                                                                                                                                                                                                                                                                                                             |

1  
2  
3  
4  
5  
6  
7  
8  
9  
10  
11  
12  
13  
14  
15  
16  
17  
18  
19  
20  
21  
22  
23  
24  
25  
26  
27  
28  
29  
30  
31  
32  
33  
34  
35  
36  
37  
38  
39  
40  
41  
42  
43  
44  
45  
46  
47

---

**Appendices**

---

|                            |    |                                                                                                                                                  |
|----------------------------|----|--------------------------------------------------------------------------------------------------------------------------------------------------|
| Informed consent materials | 32 | A model consent form have been made and provided to the Ethics Committee of the First Affiliated Hospital of Zhejiang Chinese Medical University |
| Biological specimens       | 33 | We don't have biological specimens to collect.                                                                                                   |

---

For peer review only

# BMJ Open

## Comparison of efficacy and safety between electroacupuncture at 'four sacral points' and conventional electroacupuncture for the treatment of urinary incontinence after stroke: study protocol for a randomized controlled trial

|                                 |                                                                                                                                                                                                                                                                                                                                                                                                                                                                                                                                                                                                                                                                                                                                     |
|---------------------------------|-------------------------------------------------------------------------------------------------------------------------------------------------------------------------------------------------------------------------------------------------------------------------------------------------------------------------------------------------------------------------------------------------------------------------------------------------------------------------------------------------------------------------------------------------------------------------------------------------------------------------------------------------------------------------------------------------------------------------------------|
| Journal:                        | <i>BMJ Open</i>                                                                                                                                                                                                                                                                                                                                                                                                                                                                                                                                                                                                                                                                                                                     |
| Manuscript ID                   | bmjopen-2018-021783.R2                                                                                                                                                                                                                                                                                                                                                                                                                                                                                                                                                                                                                                                                                                              |
| Article Type:                   | Protocol                                                                                                                                                                                                                                                                                                                                                                                                                                                                                                                                                                                                                                                                                                                            |
| Date Submitted by the Author:   | 18-Jul-2018                                                                                                                                                                                                                                                                                                                                                                                                                                                                                                                                                                                                                                                                                                                         |
| Complete List of Authors:       | Chen, Shan; the First Affiliated Hospital of Zhejiang Chinese Medical University, Department of Acupuncture and Moxibustion<br>Wang, Siyou; Clinical Research Section, Shanghai Research Institute of Acupuncture and Meridian<br>Xuan, Li; 3, Department of Acupuncture and Moxibustion<br>Lu, Hanti; the First Affiliated Hospital of Zhejiang Chinese Medical University, Clinical Evaluation and Analysis Center<br>Hu, Zhikai; Huaqiao University, Department of Computer Science<br>Zhang, Chao; the First Affiliated Hospital of Zhejiang Chinese Medical University, Rehabilitation Unit<br>Zhang, Huifang; the First Affiliated Hospital of Zhejiang Chinese Medical University, Department of Acupuncture and Moxibustion |
| <b>Primary Subject Heading</b>: | Complementary medicine                                                                                                                                                                                                                                                                                                                                                                                                                                                                                                                                                                                                                                                                                                              |
| Secondary Subject Heading:      | Urology                                                                                                                                                                                                                                                                                                                                                                                                                                                                                                                                                                                                                                                                                                                             |
| Keywords:                       | COMPLEMENTARY MEDICINE, UROLOGY, Stroke medicine < INTERNAL MEDICINE, Stroke < NEUROLOGY, STROKE MEDICINE                                                                                                                                                                                                                                                                                                                                                                                                                                                                                                                                                                                                                           |
|                                 |                                                                                                                                                                                                                                                                                                                                                                                                                                                                                                                                                                                                                                                                                                                                     |

SCHOLARONE™  
Manuscripts

1  
2  
3 **Comparison of efficacy and safety between electroacupuncture at ‘four sacral**  
4 **points’ and conventional electroacupuncture for the treatment of urinary**  
5 **incontinence after stroke: study protocol for a randomized controlled trial**  
6  
7

8 Shan Chen<sup>1</sup>, Siyou Wang<sup>2</sup>, Lihua Xuan<sup>1</sup>, Hanti Lu<sup>3</sup>, Zhikai Hu<sup>4</sup>, Chao Zhang<sup>5</sup>,  
9 Huifang Zhang<sup>1</sup>

10  
11 Corresponding author:

12 Shan Chen

13  
14 Department of Acupuncture and Moxibustion, the First Affiliated Hospital of  
15 Zhejiang Chinese Medical University, Hangzhou, China

16  
17 No. 9 the Ninth Street, Xiasha Economic and Technological Zone, Hangzhou,  
18 Zhejiang Province 310018, China

19  
20 E-mail: breezehilly@hotmail.com

21  
22 Phone number: +86 152 5881 3929

23  
24 Fax number: 0571-85860230

25  
26 Siyou Wang, Clinical Research Section, Shanghai Research Institute of Acupuncture  
27 and Meridian, Shanghai, China

28  
29 Lihua Xuan, Department of Acupuncture and Moxibustion, the First Affiliated  
30 Hospital of Zhejiang Chinese Medical University, Hangzhou, China

31  
32 Hanti Lu, Clinical Evaluation and Analysis Center of the First Affiliated Hospital of  
33 Zhejiang Chinese Medical University, Hangzhou, China

34  
35 Zhikai Hu, Department of Computer Science, Huaqiao University, Xiamen, China

36  
37 Chao Zhang, Rehabilitation Unit of the First Affiliated Hospital of Zhejiang Chinese  
38 Medical University, Hangzhou, China

39  
40 Huifang Zhang, Department of Acupuncture and Moxibustion, the First Affiliated  
41 Hospital of Zhejiang Chinese Medical University, Hangzhou, China

42  
43  
44 **Keyword:** electroacupuncture; urinary incontinence; post-stroke; electrical pudendal  
45 nerve stimulation

46  
47  
48 **Word count:** 6690

## ABSTRACT

### Introduction

Electroacupuncture at ‘four sacral points’, also known as electrical pudendal nerve stimulation therapy, combines the advantages of pudendal nerve neuromodulation (PNM) and the technique of deep insertion of long acupuncture needles. It has been used to treat stress urinary incontinence, female urgency-frequency syndrome, idiopathic urgency urinary incontinence, and neurological bladders in previous studies. Here, we describe the protocol for a randomized controlled trial for evaluation of the efficacy and safety of electroacupuncture at ‘four sacral points’ for the management of urinary incontinence after stroke.

### Methods and Analysis

This is an open-label randomized controlled trial with blinded assessments and analyses. A total of 140 eligible patients will be randomly allocated to two groups. The treatment group (n = 70) will receive electroacupuncture at ‘four sacral points’ along with routine medical care, while the control group will receive conventional electroacupuncture along with routine medical care. Twenty treatment sessions will occur over a period of 4 weeks. The primary outcome measures will be the self-recorded findings in an incontinent episode diary at baseline and at 4 weeks after baseline. The secondary outcome measures will be the International Consultation on Incontinence Questionnaire Urinary Incontinence – Short Form (ICIQ-UI SF) score and the Barthel Activities of Daily Living Index (Barthel ADL Index) score at baseline and at 4 and 28 weeks after baseline.

**Ethics and dissemination:** This protocol has been approved by the Ethics Committee of the First Affiliated Hospital of Zhejiang Chinese Medical University (approval No. 2018-K-059-01). Written informed consent will be obtained from each participant. The results of the study will be published in peer-reviewed journals.

**Trial registration number:** ChiCTR-IOR-17012847

### Strengths and limitations of this study

- First pilot study to evaluate the efficacy and safety of electroacupuncture at ‘four sacral points’ for the treatment of urinary incontinence after stroke
- Randomised clinical trial with pragmatic design
- A novel acupuncture intervention for the treatment of urinary incontinence after stroke
- Lack of blinding of acupuncturists and participants due to the nature of acupuncture

## INTRODUCTION

The International Continence Society (ICS) has defined urinary incontinence (UI) as the involuntary loss of urine <sup>[1]</sup>. In a systematic review, a random-effects meta-analysis determined the prevalence of UI after stroke to be 23.6% <sup>[2]</sup>. Post-stroke UI may develop because of various reasons, although direct stroke-induced damage to the neuromicturition pathways is considered the most common cause. Typical symptoms include the involuntary leakage of urine accompanied or immediately preceded by urgency. Urodynamic evaluation often reveals uninhibited detrusor contraction <sup>[3]</sup>. Physical consequences include skin dermatitis and urinary tract infections, while psychological consequences include embarrassment and low self-esteem <sup>[4]</sup>. In addition, UI is a powerful prognostic indicator of survival and eventual functional dependence <sup>[5]</sup>. The most recent research on this topic demonstrated a higher mortality rate for stroke patients with UI (56.8%) than for stroke patients without UI (11.9%) <sup>[6]</sup>. Therefore, the management of UI after stroke is of great importance.

Evidence-based interventions for post-stroke UI are somewhat limited, but include behavioural and pharmacological interventions, as well as individually tailored structured management plans, or the aid of continence nurse specialists, in order to promote continence <sup>[3]</sup>. Trials of behavioural and pharmacological therapies have provided insufficient evidence to guide the management of post-stroke UI in adults <sup>[7]</sup>. Furthermore, side effect profiles and anticholinergic burden should be considered before medications are prescribed <sup>[8]</sup>.

Neuromodulation therapies, which involve the electrical stimulation of target-specific nerves, are reportedly effective for overactive bladder (OAB) or urgency UI (UUI) <sup>[9]</sup>. Neuromodulation includes transvaginal or transanal electrical stimulation (TES), posterial tibial nerve stimulation (PTNS), sacral nerve neuromodulation (SNM), and pudendal nerve (PN) neuromodulation (PNM) <sup>[10]</sup>. Although TES is an easy procedure, it is not tolerated by many patients because of discomfort, mucosal injury and high intensity stimulation for an acceptable treatment result <sup>[11]</sup>. PTNS is a minimally invasive technique with needle electrodes but it is not direct PN stimulation and requires multiple treatments to maintain initial effect comparing with SNM <sup>[12, 13]</sup>. SNM requires surgical procedure with implantation of InterStim device, providing continuous stimulation by close nerve contact. It has a high success rate <sup>[14, 15]</sup>. Its common adverse events are pain (15-42%) and infection (3.4-6.1%) at the implant site and surgical revision that can mount up to 33% <sup>[13, 16]</sup>. PN afferents play a particularly important role in the inhibition of the voiding reflex. PNM as direct PN stimulation may be more effective than SNM because the latter only excites a portion of PN afferents. UUI refractory to SNM can be treated by PNM with the Interstim device or the Bion device (selective PN stimulation) <sup>[10, 17, 18]</sup>;



1  
2  
3 however, the performance of PNM also needs surgery so its disadvantages are similar  
4 to those of SNM [10, 18].

5  
6 According to the theory of traditional Chinese medicine (TCM), UI is primarily  
7 caused by kidney and bladder dysfunction in terms of urine control. Accordingly, the  
8 principle of acupuncture treatment for UI is to promote the recovery of urine control  
9 [19]. Acupoints on the lower abdomen, such as CV4 (Guanyuan), CV6 (Qihai), and  
10 ST28 (Shuidao), as well as those on the sacral region, such as BL32 (Ciliao), BL33  
11 (Zhongliao), and BL 35 (Huiyang), are generally selected for the regulation of the  
12 bladder voiding function [20-22]. A literature review showed that acupuncture  
13 demonstrated more favourable effects than did antimuscarinic drugs for the treatment  
14 of OAB and alleviation of symptoms in some comparative trials [23]. In addition,  
15 acupuncture reportedly improved the quality of life (QoL) and urodynamic testing  
16 parameters in patients with OAB [23, 24]. In a randomized, double-blind,  
17 placebo-controlled study, electroacupuncture significantly increased the maximum  
18 cystometric capacity and bladder compliance, decreased the detrusor leak point  
19 pressure, alleviated lower urinary tract symptoms, and decreased the risk of upper  
20 urinary tract damage in patients with post-stroke detrusor overactivity [22]. However,  
21 high-quality clinical trials with appropriate inclusion criteria, sample size, control  
22 design, acupoint selection, depth of needle insertion, and efficacy and safety  
23 evaluations are necessary to properly evaluate the efficacy of acupuncture for the  
24 treatment of post-stroke UI [7, 25, 26].

25  
26 On the basis of the theory of nerve stimulation, we developed electroacupuncture at  
27 'four sacral points' [27, 28], also known as electroacupuncture neurostimulation  
28 therapy or electrical PN stimulation therapy. This approach involves the insertion of  
29 long needles at 'four sacral points', with electricity to stimulate specific nerves under  
30 the sacral region [28, 29]. When it was first developed, this treatment was used to treat  
31 stress UI (SUI) in women, and radiographic evidence with simultaneous records of  
32 perineal ultrasonographic pelvic floor muscle (PFM) contraction, vaginal pressure,  
33 and pelvic floor surface electromyography have shown that it causes PN excitation  
34 [29]. In addition, it has been used for the treatment of female urgency-frequency  
35 syndrome, idiopathic urgency UI, and UI caused by neurological or non-neurological  
36 conditions [28, 30, 31]. The mechanism of electroacupuncture at 'four sacral points' for  
37 the treatment of post-stroke UI is that as this therapy can stimulate PN directly, it is  
38 speculated that it is able to inhibit central hyperactivity through the vicerosomatic  
39 convergence at S2-S4 common spinal neurons of PNs and bladder nerves to relieve the  
40 symptoms post-stroke UI [32, 33].

41  
42 The effectiveness of post-stroke UI treatment using alternative medicine  
43 approaches is worthy of investigation in a well-designed study. To the best of our  
44 knowledge, no randomized controlled trials (RCT) comparing the efficacy and safety  
45  
46  
47  
48  
49  
50  
51  
52  
53

of electroacupuncture at ‘four sacral points’ with those of conventional electroacupuncture for the treatment of post-stroke UI have been conducted. Here we describe a protocol for an RCT to evaluate the efficacy and safety of electroacupuncture at ‘four sacral points’ for the management of post-stroke UI.

## **METHODS AND ANALYSIS**

### **Objectives**

This is a protocol comparing the efficacy and safety of electroacupuncture at ‘four sacral points’ with those of conventional electroacupuncture for the treatment of post-stroke UI. It is designed as a blinded randomized assessment and analysis with two parallel groups over a 4-week treatment period. Randomization will be performed in a random 1:1 allocation sequence.

### **Recruitment**

This is a pragmatic RCT comparing electroacupuncture at ‘four sacral points’ with conventional electroacupuncture for the treatment of post-stroke UI. The research structure is shown in Figure 1. A total of 140 eligible participants will be recruited from the inpatient and outpatient departments of the First Affiliated Hospital of Zhejiang Chinese Medical University according to the inclusion and exclusion criteria. At the beginning of recruitment, detailed information about the study, including the research objective, study procedure, and potential benefits and risks, will be provided to all eligible patients. If the patient agrees to participate, he or she will be asked to sign a written informed consent form. This will be followed by baseline assessment and randomization. A treatment period of 4 weeks and a follow-up period of 24 weeks will follow the recruitment procedure. The neurology department of the First Affiliated Hospital of Zhejiang Chinese Medical University has the major source of patients with post-stroke UI. Our reach team includes neurological physicians and special nurses who will interview potentially eligible patients. Advertisements will be released through health education brochures, posters, and videos displayed in the outpatient and inpatient sites of the First Affiliated Hospital of Zhejiang Chinese Medical University. Recruitment information will also be issued through media (e.g. newspapers, broadcasts, and websites).

### **Design**

#### *Randomization and allocation concealment*

The randomization scheme has been created by the Clinical Evaluation and Analysis Center of The First Affiliated Hospital of Zhejiang Chinese Medical University, where professionals used SPSS Statistics 22.0 to generate a random 1:1 allocation sequence using a computer. Professionals involved in allocation will not be recruited in the

1  
2  
3 study. The random allocation is strictly kept in an opaque envelope and is inaccessible  
4 to other research staff. After baseline assessment, the envelope will be opened by an  
5 independent staff member in the participant's presence, in order to determine the  
6 group assignment for that participant. All patients who give consent for participation  
7 and who fulfil the inclusion criteria will be assigned to a group randomly.  
8 Randomisation will be requested by the staff member responsible for recruitment and  
9 clinical interviews from the First Affiliated Hospital of Zhejiang Chinese Medical  
10 University. An independent staff member will open an envelope with printed  
11 randomisation numbers in the participant's presence. The therapists will be informed  
12 about the participant's allocation at the same time. The staff member responsible for  
13 recruitment and clinical interviews is not allowed to receive information about the  
14 group allocation.

### 15 *Blinding*

16 Considering the nature of acupuncture, therapists and participants cannot be blinded  
17 to the treatment allocation. Data managers and statisticians will be blinded throughout  
18 the trial. Telephone interviewers who collect follow-up information will also be  
19 blinded. Data managers, statisticians, and telephone interviewers are restricted from  
20 discussing the treatment allocations with each other. The therapists will not be  
21 permitted to communicate with any data managers, statisticians, or telephone  
22 interviewers. If an unblinding event occurs among data managers, statisticians, or  
23 telephone interviewers, the relevant work will be transferred to other appropriately  
24 blinded data managers, statisticians, or telephone interviewers. The Investigator must  
25 report all code breaks (with reason) as they occur on the corresponding CRF page.

## 26 **Participants**

### 27 *Sample size*

28 With reference to a similar study<sup>[33]</sup> with 120 women (efficacy rate, 70.1%:45%), the  
29 sample size has been calculated, using PASS 11 software, as 120 patients for a power  
30 (1-beta) of 0.80, an alpha (significance level) of 0.05, and a ratio of 1:1. With  
31 consideration of the estimated dropout rate (15%), the total sample size will be 140  
32 (70 in each group).

### 33 *Inclusion criteria*

- 34 1. Male or female patients aged 30–85 years
- 35 2. Diagnosis of post-stroke UI in accordance with the criteria of the American Stroke  
36 Association<sup>[34]</sup> and the International Continence Society<sup>[35]</sup>
- 37 3. Inpatients or outpatients with a post-stroke interval of 4 weeks to 2 years
- 38 4. Stable vital signs, normal consciousness, and compliance with treatment
- 39 5. Refractoriness to medications (patients who have taken antimuscarinic agents with  
40 no UI improvement)

## 6. Provision of written informed consent

### *Exclusion criteria*

1. UI caused by other diseases such as Parkinson's disease, multiple sclerosis, spinal injury, or Alzheimer's disease
2. Pre-stroke UI, SUI or mixed UI, or overflow incontinence
3. Urinary retention concomitant with UI
4. Urethral injury, lower urinary tract obstruction, acute urinary tract infection, refractory urinary tract infection, hydronephrosis, urological calculi, or tumours
5. Severe cognitive impairment, as defined by a Mini-Mental State Examination (MMSE) score of <22 [36]
6. Insufficiency of the heart, lungs, liver, and/or kidneys
7. Presence of an implantable electronic device

### *Elimination criteria*

1. Inclusion despite non-fulfilment of the inclusion criteria
2. Lack of exclusion despite fulfilment of the exclusion criteria
3. Eligible participants who receive no interventions

### *Dropout criteria*

1. Poor participant compliance (lack of adherence to treatment for personal reasons)
2. Serious adverse events (SAE), complications, or special physiological changes necessitating discontinuation of the intervention
3. Voluntary dropout

## **Intervention**

All participants will receive routine medical care for stroke recovery, including the control of blood pressure, blood sugar, and blood lipids and routine rehabilitation training. All of the study-related treatments will be provided by skilled acupuncturists who will strictly follow the detailed procedures for each group. During the treatment course and 24-week follow-up time, the administration of antimuscarinic agents and other drugs for neurogenic detrusor overactivity is prohibited for all the patients. They are also not permitted to receive other acupuncture treatment or physiotherapy for UI. All of the study-related treatments will be provided by certified and skilled acupuncturists who will strictly follow the detailed procedures for each group.

## **Standard operating procedure**

1. Needle requirements  
Disposable sterile acupuncture needles in accordance with national standards within the validity period will be used.
2. Hand hygiene of the operator  
The operator is required to sterilize his or her hands with a sanitizer before the acupuncture procedure.
3. Sterilization of the acupuncture points

1  
2  
3 Within a 5-cm diameter with the acupoint as the centre, sterilize the skin over the  
4 acupoints using a cotton swab dipped in 0.45%–0.55% povidone iodine or 75%  
5 ethanol.  
6

#### 7 4. Procedure

8 Treatment group: Participants in this group will receive electroacupuncture at  
9 ‘four sacral points’.

##### 10 a. Selection of points: Four sacral points (Figure 2 and Figure 3) are selected.

11 The two upper points are located on either side of the sacrococcygeal joint,  
12 approximately 1 cm from the joint. The two lower points are located on either  
13 side of the tip of the coccyx, approximately 1 cm from the coccyx.  
14 Acupuncture will be performed at LI15 (Jianyu), LI11 (Quchi), LI10  
15 (Shousanli), SJ5 (Waiguan), and LI4 (Hegu) for participants with upper limb  
16 paralysis. For participants with lower limb paralysis, ST31 (Biguan), ST34  
17 (Liangqiu), SP10 (Xuehai), SP9 (Yinlingquan), GB39 (Xuanzhong), GB40  
18 (Qiuxu), and LR3 (Taichong) will also be used. GB20 (Fengchi), SJ17  
19 (Yifeng), and GB12 (Wangu) will be used for participants with dysphagia,  
20 with the additional use of ST4 (Dicang), ST6 (Jiache), and LI20 (Yingxiang)  
21 for participants with facial paralysis and drooling.  
22

##### 23 b. Detailed procedure: At the upper sacral points, a needle (Suzhou Shenlong 24 Medical Apparatus Factory, Suzhou, China) measuring $0.40 \times 100$ mm will be 25 inserted perpendicularly to a depth of 80–90 mm to induce a sensation 26 referred to the urethra or anus via stimulation of the main trunk of the PN. At 27 the lower sacral points, a needle measuring $0.40 \times 100$ or $0.40 \times 125$ mm will 28 be inserted obliquely toward the ischiorectal fossa to a depth of 90–110 mm 29 to induce a sensation referred to the urethra via stimulation of the perineal 30 nerve (Figure 4). Once the sensation is induced in the respective regions, two 31 pairs of electrodes from the G6805-A electroacupuncture device (Shantou 32 Medical equipment factory, Shantou, China) will be connected to the two 33 ipsilaterally inserted needles, with the anode connected to the upper needle 34 and the cathode connected to the lower needle. The device will be set to 35 produce electrical stimulation (biphasic 2-ms pulse duration) at a frequency of 36 2.0 Hz and a moderate intensity of 25–35 mA. Electrostimulation will be 37 performed for 20 min during each treatment. PFM contraction around the 38 urethra (often comfortable) must be maintained during the entire 39 electrostimulation procedure. Conventional acupuncture without electricity 40 will be applied for 20 min at the remaining acupoints. 41 42 43 44 45 46 47 48 49 50 51 52 53

54 Control group: Participants in this group will receive conventional  
55 electroacupuncture.  
56  
57

- 1  
2  
3 a. Selection of points: Abdominal points CV6 (Qihai), CV4 (Guanyuan), and  
4 ST28 (Shuidao, both sides), corresponding to the conventional  
5 electroacupuncture treatment of UI. The point selection procedure for participants  
6 with upper or lower limb paralysis, facial paralysis, and/or dysphagia will be the  
7 same as that used for the treatment group.  
8  
9 b. Detailed procedure: At CV6 (Qihai), CV4 (Guanyuan), and ST28 (Shuidao),  
10 a needle measuring 0.25 × 40 mm will be inserted perpendicularly to a depth of  
11 25–40 mm to induce a local sensation (distention or sourness). Subsequently, the  
12 electrodes from the G6805-A electroacupuncture device will be connected to the  
13 needles at these points, with the anode connected to ST28 and the cathode  
14 connected to CV6 and CV4. The device will be set to produce electrical  
15 stimulation (biphasic 2-ms pulse duration) at a frequency of 2.0 Hz and a  
16 moderate intensity that is tolerable by the participants. Electrostimulation will be  
17 performed for 20 min during each treatment. Conventional acupuncture without  
18 electricity will be applied for 20 min at the remaining acupoints.  
19  
20 5. Treatment period: All participants will receive treatment every day from Monday  
21 to Friday. One course of treatment will comprise 10 sessions. The therapeutic  
22 effects will be evaluated after the completion of two treatment courses (4 weeks).  
23  
24  
25  
26  
27  
28  
29

### 30 Outcome measures

#### 31 Primary outcome measures

##### 32 The incontinent episode diary

33 The incontinent episode diary (Table 1) will be used to derive the primary outcome  
34 measure. The number of incontinent episodes will be recorded by the participants  
35 over a period of 3 days at baseline. A template will be provided for patient use. This  
36 data will be recorded again at the end of treatment.  
37  
38  
39  
40

41 Table 1 The incontinent episode diary

| Name                                                                     | Date |       |  |       |  |
|--------------------------------------------------------------------------|------|-------|--|-------|--|
| Record every accidental loss of urine over 3 consecutive days with an X. |      |       |  |       |  |
| Start at baseline and continue recording for 3 days                      |      |       |  |       |  |
| Day 1                                                                    |      | Day 2 |  | Day 3 |  |
| eg X                                                                     |      |       |  |       |  |
|                                                                          |      |       |  |       |  |
|                                                                          |      |       |  |       |  |
|                                                                          |      |       |  |       |  |
|                                                                          |      |       |  |       |  |
|                                                                          |      |       |  |       |  |

1  
2  
3 *Secondary outcome measures*

4 1. International Consultation on Incontinence Questionnaire Urinary Incontinence –  
5 Short Form (ICIQ-UI SF) [37] (Table 2)

6  
7 2. Barthel Activities of Daily Living Index (Barthel ADL Index) [38] (Table 3)

8 The ICIQ-UI SF is used in research and clinical practice worldwide. It is a brief and  
9 psychometrically robust patient-completed questionnaire for evaluating the frequency  
10 and severity of UI in men and women and its impact on quality of life (QoL). The  
11 ICIQ-UI SF score ranges from 0 to 21 [39]. The Barthel ADL Index is a 10-item  
12 measure of activities of daily living (ADL) that is frequently used in clinical practice  
13 and as a trial outcome measure in stroke medicine [38]. It is used to assess baseline  
14 abilities to quantify functional changes, including UI, after rehabilitation in stroke  
15 patients.  
16

17 The above outcome measures will be assessed at baseline and at 4 and 28 weeks after  
18 baseline.  
19  
20  
21  
22  
23  
24  
25  
26  
27  
28  
29  
30  
31  
32  
33  
34  
35  
36  
37  
38  
39  
40  
41  
42  
43  
44  
45  
46  
47  
48  
49  
50  
51  
52  
53  
54  
55  
56  
57  
58  
59  
60

1  
2  
3  
4  
5  
6  
7  
8  
9  
10  
11  
12  
13  
14  
15  
16  
17  
18  
19  
20  
21  
22  
23  
24  
25  
26  
27  
28  
29  
30  
31  
32  
33  
34  
35  
36  
37  
38  
39  
40  
41  
42  
43  
44  
45  
46  
47

Table 2 International Consultation on Incontinence Questionnaire Urinary Incontinence – Short Form (ICIQ-UI SF)

|                                                                                                                                                        |                                                                                                                                                       |                               |
|--------------------------------------------------------------------------------------------------------------------------------------------------------|-------------------------------------------------------------------------------------------------------------------------------------------------------|-------------------------------|
| 1. Please write in your date of birth:                                                                                                                 | <input type="checkbox"/> <input type="checkbox"/> <input type="checkbox"/> <input type="checkbox"/> <input type="checkbox"/> <input type="checkbox"/> |                               |
|                                                                                                                                                        | date month year                                                                                                                                       |                               |
| 2. Are you                                                                                                                                             | Female <input type="checkbox"/>                                                                                                                       | Male <input type="checkbox"/> |
| 3. How often do you leak urine?<br>(Tick one box)                                                                                                      | never                                                                                                                                                 | <input type="checkbox"/> 0    |
|                                                                                                                                                        | about once a week or less often                                                                                                                       | <input type="checkbox"/> 1    |
|                                                                                                                                                        | two or three times a week                                                                                                                             | <input type="checkbox"/> 2    |
|                                                                                                                                                        | about once a day                                                                                                                                      | <input type="checkbox"/> 3    |
|                                                                                                                                                        | several times a day                                                                                                                                   | <input type="checkbox"/> 4    |
|                                                                                                                                                        | all the time                                                                                                                                          | <input type="checkbox"/> 5    |
| 4. We would like to know how much urine you think leaks.<br>How much urine do you usually leak (whether you wear protection or not)?<br>(Tick one box) | None                                                                                                                                                  | <input type="checkbox"/> 0    |
|                                                                                                                                                        | a small amount                                                                                                                                        | <input type="checkbox"/> 2    |
|                                                                                                                                                        | a moderate amount                                                                                                                                     | <input type="checkbox"/> 4    |
|                                                                                                                                                        | a large amount                                                                                                                                        | <input type="checkbox"/> 6    |
| 5. Overall, how much does leaking urine interfere with your everyday life?<br>Please ring a number between 0 (not at all) and 10 (a great deal)        | 0    1    2    3    4    5    6    7    8    9    10                                                                                                  |                               |
|                                                                                                                                                        | not at all                                                                                                                                            | a great deal                  |



1  
2  
3  
4  
5  
6  
7  
8  
9  
10  
11  
12  
13  
14  
15  
16  
17  
18  
19  
20  
21  
22  
23  
24  
25  
26  
27  
28  
29  
30  
31  
32  
33  
34  
35  
36  
37  
38  
39  
40  
41  
42  
43  
44  
45  
46  
47

ICIQ score: sum scores 3+4+5 □□

6. When does urine leak? (Please tick all that apply to you)

- never – urine does not leak □
- leaks before you can get to the toilet □
- leaks when you cough or sneeze □
- leaks when you are asleep □
- leaks when you have finished urinating and are dressed □
- leaks for no obvious reason □
- leaks all the time □

Table 3 Barthel Activities of Daily Living Index (Barthel ADL Index)

| The Barthel Index |                                                                                                   | Patient Name |
|-------------------|---------------------------------------------------------------------------------------------------|--------------|
|                   |                                                                                                   | Rater Name   |
|                   |                                                                                                   | Date:        |
| Activity          |                                                                                                   | Score        |
| Feeding           | Unable                                                                                            | 0            |
|                   | Some help required (e.g., needs help cutting, spreading butter, etc. or requires a modified diet) | 5            |
|                   | Independent                                                                                       | 10           |
| Bathing           | Dependent                                                                                         | 0            |
|                   | Independent (or in shower)                                                                        | 5            |
| Grooming          | Needs help with personal care                                                                     | 0            |

1  
2  
3  
4  
5  
6  
7  
8  
9  
10  
11  
12  
13  
14  
15  
16  
17  
18  
19  
20  
21  
22  
23  
24  
25  
26  
27  
28  
29  
30  
31  
32  
33  
34  
35  
36  
37  
38  
39  
40  
41  
42  
43  
44  
45  
46  
47

|                                  |                                                                        |    |
|----------------------------------|------------------------------------------------------------------------|----|
|                                  | Independent face/hair/teeth/shaving (implements provided)              | 5  |
| Dressing                         | Dependent                                                              | 0  |
|                                  | Needs help but can do at least half unaided                            | 5  |
|                                  | Independent (including buttons, zips, laces, etc.)                     | 10 |
| Bowels                           | Incontinent or catheterized and unable to manage alone                 | 0  |
|                                  | Occasional accident                                                    | 5  |
|                                  | Continent                                                              | 10 |
| Bladder                          | Incontinent or catheterized and unable to manage alone                 | 0  |
|                                  | Occasional accident                                                    | 5  |
|                                  | Continent                                                              | 10 |
| Toilet use                       | Dependent                                                              | 0  |
|                                  | Needs some help, but can do some things alone                          | 5  |
|                                  | Independent (can get on and off, dress and wipe unassisted)            | 10 |
| Transfer (bed to chair and back) | Unable, no sitting balance                                             | 0  |
|                                  | Major help (one or two people, physical), can sit                      | 5  |
|                                  | Minor help (verbal or physical)                                        | 10 |
|                                  | Independent                                                            | 15 |
| Mobility (on level surfaces)     | Immobile or <50 yards                                                  | 0  |
|                                  | Wheelchair independent, including corners; >50 yards                   | 5  |
|                                  | Walks with little help from one person (verbal or physical); >50 yards | 10 |
|                                  | Independent (but may use an aid; e.g., walking stick); >50 yards       | 15 |
| Stairs                           | Unable                                                                 | 0  |
|                                  | Needs help (verbal, carrying aid)                                      | 5  |
|                                  | Independent                                                            | 10 |
| Total                            |                                                                        |    |

### **Adverse events (AEs)**

An adverse event of acupuncture is defined as symptoms or diseases that are against the purpose of the treatment during or following the acupuncture treatment [40]. The research staff will record the blood pressure, heart rate, heart rhythm, and respiration rate and observe changes in the consciousness of all participants before and after the treatment. The description of AEs, time of occurrence, location of the reaction, level of severity, corresponding management, and the necessity for patient withdrawal from the trial will be recorded on the Case Report Forms (CRFs). AEs of acupuncture will be classified according to their location as local and systemic reactions.

#### **Local reactions:**

Subcutaneous haematoma  
Minor bleeding on withdrawal of the needle  
Subcutaneous bruise  
Pain in the punctured region after treatment  
Skin allergy in the punctured region after treatment  
Local infection

#### **Systemic reactions:**

Acupuncture fainting  
Abdominal distention  
Dizziness or vertigo  
Leg weakness  
Muscle spasm  
Systemic allergy  
Systemic infection  
Organ injury

Severe AEs are defined as symptoms or diseases that result in hospitalization or prolong hospitalization, disability, a life-threatening situation, or even death [41]. Systemic infection and organ injury are two major AEs. Severe AEs will be reported to the Ethics Committee within 24 h. The Ethics Committee will provide medical suggestions for the research team and decide whether the patient should continue the ongoing treatment.

For patients having common adverse reactions, appropriate medical care will be given to ease local bleeding, irritation, bruising, and so on. For those who have severe reactions leading to organ injury, systematic infection, systematic allergy, and so on, compensation will be given to cover their medical costs by our research team.

### **Data management, monitoring and auditing**

A research assistant will record the baseline characteristics of all participants. Trained caregivers will record the frequency of UI at baseline and at 4 weeks after baseline. A researcher who remains blinded to treatment group allocation will collect data regarding the frequency of UI and the weight of pads from the caregivers. The participants will also complete ICIQ-UI SF and the Barthel ADL Index at baseline and

1  
2  
3 at 4 weeks after baseline. A blinded telephone interviewer will interview the  
4 participants and collect data pertaining to ICIQ-UI SF and the Barthel ADL Index at  
5 28 weeks after baseline. All data will be recorded on the CRFs. For participants who  
6 discontinue treatment early, we will use last observation carried forward analysis to  
7 handle the missing data, meaning that we will input outcome data of patients who are  
8 lost to follow-up in our analysis.  
9

10 After the completion of the CRFs, two independent researchers blinded to the group  
11 allocation will separately input data into an Excel spreadsheet. Another independent  
12 supervisor will check the two datasets for consistency. If conflicting data entries are  
13 discovered, the supervisor will compare the datasets with the original CRFs and mark  
14 the modification on the CRFs. The principal investigator of the research team will  
15 have the access to all documents and will protect the electronic documents with a  
16 password and create backups of all documents. The First Affiliated Hospital of  
17 Zhejiang Chinese Medical University will be responsible for the storage and  
18 management of all data.  
19

20 An independent data monitoring committee (DMC) is made up of members from  
21 Clinical Evaluation and Analysis Center of The First Affiliated Hospital of Zhejiang  
22 Chinese Medical University. The DMC, blinded to the treatment allocations, will meet  
23 regularly to monitor the study data. The DMC will also perform interim-analysis  
24 when 50% of patients have been randomised and have completed the primary  
25 outcome measurement.  
26  
27  
28

29 The First Affiliated Hospital of Zhejiang Chinese Medical University will audit this  
30 study mainly for participant enrolment, consent, and costs.  
31  
32

### 33 **Statistical analysis**

34 All statistical analyses will be performed by a statistician from the Clinical Evaluation  
35 and Analysis Center of The First Affiliated Hospital of Zhejiang Chinese Medical  
36 University using SPSS Statistics 22.0. A normality test will be used to determine  
37 whether the data are normally distributed. ANCOVA (analysis of covariance) will be  
38 used if there is imbalance in the baseline characteristics and outcome measures.  
39 Continuous variables with a normal distribution will be expressed as means  $\pm$   
40 standard deviations (SDs). Continuous variables with a non-normal distribution or  
41 ordinal variables will be expressed as medians (with lower, upper quartiles).  
42 Categorical variables will be summarized as counts and proportions. A Student's t-test  
43 will be used if the primary and secondary outcome measures conform to normal  
44 distribution. A paired t-test will be used to compare pre-treatment and post-treatment  
45 UI occurrence for the primary outcome measure and pre-treatment and post-treatment  
46 scores in the secondary outcome measures. The independent sample t-test will be used  
47 to compare the difference between two groups for primary and secondary outcome  
48 measures. A Wilcoxon signed rank test will be used if the primary and secondary  
49 outcome measures conform to abnormal distribution. A Wilcoxon paired test will be  
50 used to compare pre-treatment and post-treatment UI occurrence for the primary  
51 outcome measure and pre-treatment and post-treatment scores in secondary outcome  
52 measures. The inter-group rank sum test will be used to compare the difference  
53  
54  
55  
56  
57  
58  
59  
60

1  
2  
3 between two groups for primary and secondary outcome measures. All reported  
4 P-values will be two-sided, and confidence intervals (CI) will be at the 95% level. A  
5 P-value of <0.05 will be considered statistically significant.  
6  
7

### 8 **Patient and Public Involvement**

9 Patients and the public were not directly involved in the design, recruitment or  
10 conduct of this pilot study. Since the participants in our study are under chronic  
11 conditions, the outcome measures valued in this study was influenced by patients'  
12 priorities, experience and preferences. As most stroke patients are in great need of  
13 acupuncture treatment in China, we did not view the intervention as burdensome and  
14 the burden of the intervention was not assessed by the patients themselves. The results  
15 of this study will be disseminated in peer-reviewed journals and at academic  
16 conferences. A summary of the study report will be written for patients through online  
17 website (<https://sandychenshan.haodf.com/>) and WeChat (a free messaging and  
18 calling application) account or group.  
19  
20  
21  
22

## 23 **ETHICS AND DISSEMINATION**

### 24 **Research ethics approval**

25 The Ethics Committee of the First Affiliated Hospital of Zhejiang Chinese Medical  
26 University has reviewed and approved this protocol (approval No. 2018-K-059-01).  
27 This study will adhere to the principles of the Declaration of Helsinki. This study will  
28 be conducted at the First Affiliated Hospital of Zhejiang Chinese Medical University.  
29 Each participant will voluntarily sign written informed consent forms.  
30  
31  
32

### 33 **Modification of the protocol**

34 Any modifications to the protocol, including changes of study objectives, study design,  
35 patient population, sample sizes, study procedures, or significant administrative  
36 aspects, will require a formal application to the Zhejiang Provincial Administration of  
37 Traditional Chinese Medicine as well as the Chinese clinical trial registry.  
38  
39

### 40 **Confidentiality**

41 All study participants will be given an identification number throughout the trial to  
42 assure confidentiality. All participants' information will be stored in locked cabinets  
43 with limited access.  
44  
45

### 46 **Dissemination**

47 The initial data will be accessible via Research Manager (ResMan). The results of this  
48 study will be published in open-access and peer-reviewed journals and presented at  
49 relevant conferences.  
50  
51  
52

## 53 **DISCUSSION**

54 According to the present study protocol, in addition to electroacupuncture at 'four  
55 sacral points' in the treatment group and conventional electroacupuncture in the  
56  
57  
58  
59  
60

1  
2  
3 control group, the same acupoints for other stroke symptoms will also be selected for  
4 both groups. Other stroke symptoms include unilateral limb weakness, facial paresis,  
5 dysphasia, and dysphagia [42]. In China, acupuncture has been a primary medical  
6 intervention for stroke [43]. In fact, not providing acupuncture therapy to a stroke  
7 patient is considered impractical.  
8

9 Antimuscarinic agents are considered first-line drugs for neurogenic detrusor  
10 overactivity (NDO) [44]. However, because of their moderate efficacy and  
11 troublesome side effects, quite a few patients exhibit refractory disease [45].  
12 According to the eligibility criteria, participants who are refractory to medication will  
13 be included in this RCT.  
14

15 With regard to the outcome measures, the incontinent episode diary will be used as  
16 objective measure to record the frequency of incontinence. Patients will record their  
17 findings in the incontinent diary for only 3 days, because a longer recording period  
18 can lead to decreased patient compliance [46-47]. In order to improve adherence,  
19 health education about the importance of UI management will be conducted by a  
20 special nurse and brochures on post-stroke UI will be provided to patients. The  
21 ICIQ-UI SF and Barthel ADL Index will be used as subjective measures to investigate  
22 UI symptoms and QoL. The ICIQ-UI SF is a useful tool to assess UI with regard to  
23 the severity of symptoms and impact on QoL at baseline and at follow-up [48]. The  
24 Barthel ADL Index (feeding, bathing, grooming, dressing, bowels, bladder, toilet use,  
25 transfer, mobility, and stairs) is an important predictor of stroke outcomes. Studies  
26 involving stroke survivors should include ADL assessments for better management of  
27 stroke patients [38].  
28

29 In summary, we have described a protocol for a pilot RCT to evaluate the efficacy  
30 and safety of electroacupuncture at ‘four sacral points’ for the treatment of post-stroke  
31 UI. The results of this trial should lead to a greater understanding of promising  
32 alternative options for post-stroke UI.  
33  
34  
35  
36  
37

### 38 **Author affiliations**

39 <sup>1</sup>Department of Acupuncture and Moxibustion, the First Affiliated Hospital of  
40 Zhejiang Chinese Medical University, Hangzhou, China

41 <sup>2</sup>Clinical Research Section, Shanghai Research Institute of Acupuncture and Meridian,  
42 Shanghai, China

43 <sup>3</sup>Clinical Evaluation and Analysis Center of the First Affiliated Hospital of Zhejiang  
44 Chinese Medical University, Hangzhou, China

45 <sup>4</sup>Department of Computer Science, Huaqiao University, Xiamen, China

46 <sup>5</sup>Rehabilitation Unit of the First Affiliated Hospital of Zhejiang Chinese Medical  
47 University, Hangzhou, China  
48  
49  
50

### 51 **Contributors**

52 SC conceived and wrote the protocol; SYW and LHX contributed to the study design;  
53 HTL contributed to the sample size calculation and wrote the statistical analysis plan;  
54 ZKH drew the flow charts; CZ and HFZ prepared the figures and tables. All authors  
55 have read and approved the final manuscript.  
56  
57  
58  
59  
60

### Funding Statement

This work was supported by Zhejiang Provincial Administration of Traditional Chinese Medicine (grant number 2016ZA076; 2018ZA045).

### Competing Interests Statement

None

### Ethics approval

The Ethics Committee of the First Affiliated Hospital of Zhejiang Chinese Medical University.

### Provenance and peer review

Not commissioned; externally peer reviewed.

### REFERENCES

- 1 Abrams P, Andersson KE, Birder L, et al. Fourth International Consultation on Incontinence Recommendations of the International Scientific Committee: Evaluation and treatment of urinary incontinence, pelvic organ prolapse, and fecal incontinence. *Neurourol Urodyn* 2010;29:213-40.
- 2 Ruffion A, Castro DD, Patel H, et al. Systematic review of the epidemiology of urinary incontinence and detrusor overactivity among patients with neurogenic overactive bladder. *Neuroepidemiology* 2013;41:146-55.
- 3 Mehdi Z, Birns J, Bhalla A, et al. Post-stroke urinary incontinence. *Int J Clin Pract* 2013;67:1128-37.
- 4 Cai W, Wang J, Wang L, et al. Prevalence and risk factors of urinary incontinence for post-stroke inpatients in Southern China. *Neurourol Urodyn* 2015;34:231-5.
- 5 Pizzi A, Falsini C, Martini M, et al. Urinary incontinence after ischemic stroke: clinical and urodynamic studies. *Neurourol Urodyn* 2014;33:420-5.
- 6 Gregor J, Steve P, Siobhan C, et al. Urinary incontinence and indwelling urinary catheters as predictors of death after new-onset stroke: a report of the south london stroke register. *J Stroke Cerebrovasc Dis* 2018;27:118-24.
- 7 Thomas LH, Cross S, Barrett J, et al. Treatment of urinary incontinence after stroke in adults. *Cochrane Database of Systematic Reviews* 2008;23:CD004462.
- 8 Paniker JN. Urogenital symptoms in neurologic patients. *Continuum*. 2017;23:533-52.
- 9 Amundsen CL, Komesu YM, Chermansky C, et al. Two-Year outcomes of sacral neuromodulation versus onabotulinumtoxinA for refractory urgency urinary incontinence: a randomized trial. *Eur Urol* Published Online First: 23 February 2018. doi:10.1016/j.eururo.2018.02.011
- 10 Bosch JL. Electrical neuromodulatory therapy in female voiding dysfunction. *BJU Int* 2006;98 suppl:43-8.
- 11 van Balken MR, Vergunst H, Bemelmans BL. The use of electrical devices for the treatment of bladder dysfunction: a review of methods. *J Urol* 2004;172:846-51.

- 1  
2  
3 12 Tahereh E, Nastaran T, Elahe, et al. Posterior Tibial Nerve Stimulation for  
4 Treating Neurologic Bladder in Women: a Randomized Clinical Trial. *Acta Medica*  
5 *Iranica* 2014;52:817-21.  
6  
7 13 Manuela T, Enrico A, Frank VA. What Is New in Neuromodulation for  
8 Overactive Bladder? *Eur Urol Focus* 2018; 4:49-53.  
9  
10 14 Smits MA, Oerlemans D, Marcelissen TA, et al. Sacral neuromodulation in  
11 patients with idiopathic overactive bladder after initial botulinum toxin therapy. *J*  
12 *Urol* 2013;190:2148-52.  
13  
14 15 Siegel S, Noblett K, Mangel J, et al. Results of a prospective, multicenter study  
15 evaluating quality of life, safety, and efficacy of sacral neuromodulation at twelve  
16 months in subjects with symptoms of overactive bladder. *Neurourol Urodyn*  
17 2016;34:246-51.  
18  
19 16 Lee C, Pizarro-Berdichevsky J, Clifton MM, et al. Sacral neuromodulation  
20 implant infection: risk factors and prevention. *Curr Urol Rep* 2017;18:16.  
21  
22 17 Peters KM. Alternative approaches to sacral nerve stimulation. *Int Urogynecol J*  
23 2010;21:1559-63.  
24  
25 18 Groen J, Amiel C, Bosch JL. Chronic pudendal nerve neuromodulation in women  
26 with idiopathic refractory detrusor overactivity incontinence: results of a pilot study  
27 with a novel minimally invasive implantable mini-stimulator. *Neurourol Urodyn*  
28 2005;24:226-30.  
29  
30 19 Sun Z, Yu N, Yue J, et al. Acupuncture for urinary incontinence after stroke: a  
31 protocol for systematic review. *BMJ Open* 2016;6:e008062.  
32  
33 20 Song F, Jiang S, Zheng L, et al. Electroacupuncture for post-stroke urinary  
34 incontinence: a multicenter randomized controlled study. *Zhongguo Zhen Jiu*  
35 2013;33:769-73.  
36  
37 21 Paik SH, Han SR, Kwon OJ, et al. Acupuncture for the treatment of urinary  
38 incontinence: A review of randomized controlled trials. *Exp Ther Med* 2013;6:773-80.  
39  
40 22 Liu Y, Liu L, Wang X. Electroacupuncture at points Baliao and Huiyang (BL35)  
41 for post-stroke detrusor overactivity. *Neural Regen Res* 2013;8:1663-72.  
42  
43 23 Forde JC, Jaffe E, Stone BV, et al. The role of acupuncture in managing  
44 overactive bladder; a review of the literature. *Int Urogynecol J* 2016;27:1645-51.  
45  
46 24 Olivera CK, Meriwether K, El-Nashar S, et al. Nonantimuscarinic treatment for  
47 overactive bladder: a systematic review. *Am J Obstet Gynecol* 2016;215:34-57.  
48  
49 25 Solberg M, Alræk T, Mdala I, et al. A pilot study on the use of acupuncture or  
50 pelvic floor muscle training for mixed urinary incontinence. *Acupunct Med*  
51 2016;34:7-13.  
52  
53 26 Liu Z, Wang Y, Xu H, et al. Observation on therapeutic effect of  
54 electroacupuncture for post-stroke urge incontinence. *Xin Zhong Yi* 2010;42:73-5.  
55  
56 27 Wang S, Chen G, Li L. "Four sacral needles therapy" for female stress  
57 incontinence. *Shanghai J Acup Moxib* 2006;25:15-7.  
58  
59 28 Lu J. Observation on therapeutic effect of electroacupuncture neurostimulation  
60 therapy for urge urinary incontinence. *Zhongguo Zhenjiu* 2012;32:691-5.  
29 Wang S, Zhang S. Simultaneous perineal ultrasound and vaginal pressure  
measurement prove the action of electrical pudendal nerve stimulation in treating



- 1  
2  
3 female stress incontinence. *BJU International* 2012;110:1338-1343.
- 4 30 Wang S, Zhang S, Zhao L. Long-term efficacy of electrical pudendal nerve  
5 stimulation for urgency–frequency syndrome in women. *Int Urogynecol J*  
6 2014;25:397-402.
- 7  
8 31 Wang S, LvJ, FX et al. Efficacy of electrical pudendal nerve stimulation versus  
9 transvaginal electrical stimulation in treating female idiopathic urgency urinary  
10 incontinence. *J Urol* 2017;197:1496-501.
- 11  
12 32 Wang S. Electroacupuncture pudendal nerve stimulation and its application. *J*  
13 *Acupunt Tuina Sci* 2013;11:117-21.
- 14  
15 33 Wang S, Lv J, Feng X, et al. Efficacy of Electrical Pudendal Nerve Stimulation  
16 versus Transvaginal Electrical Stimulation in Treating Female Idiopathic Urgency  
17 Urinary Incontinence. *J Urol* 2017;6:1496-501.
- 18  
19 34 Sacco RL, Kasner SE, Broderick JP, et al. An updated definition of stroke for the  
20 21st century: a statement for healthcare professionals from the American Heart  
21 Association/American Stroke Association. *Stroke* 2013;44:2064-89.
- 22  
23 35 Haylen BT, de Ridder D, Freeman RM, et al. Association (IUGA)/International  
24 Continence Society (ICS) joint report on the terminology for female pelvic floor  
25 dysfunction. *Neurourol Urodyn* 2010;29:4-20.
- 26  
27 36 Grut M, Fratiglioni L, Viitanen M, et al. Accuracy of the Mini-Mental Status  
28 Examination as a screening test for dementia in a Swedish elderly population. *Acta*  
29 *Neurol Scand* 1993;87:312-71993-04-01.
- 30  
31 37 Timmermans L, Falez F, Mélot C, et al. Validation of use of the International  
32 Consultation on Incontinence Questionnaire-Urinary Incontinence-Short Form  
33 (ICIQ-UI-SF) for impairment rating: a transversal retrospective study of 120 patients.  
34 *Neurourol Urodyn* 2013;32:974-9.
- 35  
36 38 Duffy L, Gajree S, Langhorne P, et al. Reliability (inter-rater agreement) of the  
37 Barthel Index for assessment of stroke survivors: systematic review and meta-analysis.  
38 *Stroke* 2013;44:462-8.
- 39  
40 39 Hajebrahimi S, Nourizadeh D, Hamedani R, et al. Validity and reliability of the  
41 International Consultation on Incontinence Questionnaire-Urinary Incontinence Short  
42 Form and its correlation with urodynamic findings. *Urol J* 2012;9:685-90.
- 43  
44 40 Li Y, Liu Y, Zhang J, et al. Analysis on the situation of adverse reaction to  
45 acupuncture and acupuncture risk. *Zhongguo Zhenjiu* 2011;31:764-8.
- 46  
47 41 Zhao L, Li Y, Zhang F, et al. Analysis on the occurrence of laws of adverse  
48 events from 1968 patients after acupuncture treatment. Symposium of seminar of the  
49 Ninth National Young and Middle-aged Acupuncture and Tuina of China  
50 Acupuncture and Moxibustion Association 2010;270-6.
- 51  
52 42 Yew KS, Cheng EM. Diagnosis of Acute Stroke. *Am Fam Physician*  
53 2015;91:528-36.
- 54  
55 43 Zhang J, Wang D, Liu M. Overview of systematic reviews and meta-analyses of  
56 acupuncture for stroke. *Neuroepidemiology* 2014;42:50-8.
- 57  
58 44 Mehnert U, Kessler TM. The management of urinary incontinence in the male  
59 neurological patient. *Curr Opin Urol* 2014;24:586-92.
- 60  
45 Smith AL, Wein AJ. Urinary incontinence: pharmacotherapy options. *Ann Med*

2011;43:461-76.

46 Robinson D, McClish DK, Wyman JF, et al. Comparison between urinary diaries completed with and without intensive patient instructions. *Neurourol Urodyn* 1996;15:143-8.

47 Gordon D, Grpouts A. Evaluation of female lower urinary tract symptoms: overview and update. *Curr Opin Obstet Gynecol* 2001;13:521-7.

48 Nyström E, Sjöström M, Stenlund H, et al. ICIQ symptom and quality of life instruments measure clinically relevant improvements in women with stress urinary incontinence. *Neurourol Urodyn* 2015;34:747.

### Figure legends

Figure 1 Study flowchart

Figure 2 Locations of the 'four sacral points' for electroacupuncture

Figure 3 Anatomical positions of the 'four sacral points' for electroacupuncture

Figure 4 Transverse computed tomography (CT) image of the coccygeal apex

The tip of the needle inserted at the lower sacral point is visible in the ischiorectal fossa (adjacent to the PN in Alcock's canal)



Study flowchart

151x105mm (300 x 300 DPI)

View only

1  
2  
3  
4  
5  
6  
7  
8  
9  
10  
11  
12  
13  
14  
15  
16  
17  
18  
19  
20  
21  
22  
23  
24  
25  
26  
27  
28  
29  
30  
31  
32  
33  
34  
35  
36  
37  
38  
39  
40  
41  
42  
43  
44  
45  
46  
47  
48  
49  
50  
51  
52  
53  
54  
55  
56  
57  
58  
59  
60



Locations of the 'four sacral points' for electroacupuncture

90x90mm (300 x 300 DPI)



Anatomical positions of the 'four sacral points' for electroacupuncture

216x90mm (300 x 300 DPI)

1  
2  
3  
4  
5  
6  
7  
8  
9  
10  
11  
12  
13  
14  
15  
16  
17  
18  
19  
20  
21  
22  
23  
24  
25  
26  
27  
28  
29  
30  
31  
32  
33  
34  
35  
36  
37  
38  
39  
40  
41  
42  
43  
44  
45  
46  
47  
48  
49  
50  
51  
52  
53  
54  
55  
56  
57  
58  
59  
60



Transverse computed tomography (CT) image of the coccygeal apex  
The tip of the needle inserted at the lower sacral point is visible in the ischiorectal fossa (adjacent to the PN  
in Alcock's canal)

90x90mm (300 x 300 DPI)

| Section/item                                  | ItemNo                                                                                                                                                                                                                            | Description                                                                                                                                                                                                                                                                                                                                                                                                                                                                                                                                                                                                                                                                                                                                                                                                                                                                                                                                                                                                                                                                                                                                                                                                                                                                                                                                                                                                                                                                                                           |                                               |                     |                                          |             |                               |  |                                           |                                                                    |                 |                                                                    |                      |  |                            |                                             |                                |                                                                                                                                         |              |                                                                                                   |                  |                                                                                                                                                                                                                                   |                          |       |                                           |                                                          |
|-----------------------------------------------|-----------------------------------------------------------------------------------------------------------------------------------------------------------------------------------------------------------------------------------|-----------------------------------------------------------------------------------------------------------------------------------------------------------------------------------------------------------------------------------------------------------------------------------------------------------------------------------------------------------------------------------------------------------------------------------------------------------------------------------------------------------------------------------------------------------------------------------------------------------------------------------------------------------------------------------------------------------------------------------------------------------------------------------------------------------------------------------------------------------------------------------------------------------------------------------------------------------------------------------------------------------------------------------------------------------------------------------------------------------------------------------------------------------------------------------------------------------------------------------------------------------------------------------------------------------------------------------------------------------------------------------------------------------------------------------------------------------------------------------------------------------------------|-----------------------------------------------|---------------------|------------------------------------------|-------------|-------------------------------|--|-------------------------------------------|--------------------------------------------------------------------|-----------------|--------------------------------------------------------------------|----------------------|--|----------------------------|---------------------------------------------|--------------------------------|-----------------------------------------------------------------------------------------------------------------------------------------|--------------|---------------------------------------------------------------------------------------------------|------------------|-----------------------------------------------------------------------------------------------------------------------------------------------------------------------------------------------------------------------------------|--------------------------|-------|-------------------------------------------|----------------------------------------------------------|
| <b>Administrative Information</b>             |                                                                                                                                                                                                                                   |                                                                                                                                                                                                                                                                                                                                                                                                                                                                                                                                                                                                                                                                                                                                                                                                                                                                                                                                                                                                                                                                                                                                                                                                                                                                                                                                                                                                                                                                                                                       |                                               |                     |                                          |             |                               |  |                                           |                                                                    |                 |                                                                    |                      |  |                            |                                             |                                |                                                                                                                                         |              |                                                                                                   |                  |                                                                                                                                                                                                                                   |                          |       |                                           |                                                          |
| Title                                         | 1                                                                                                                                                                                                                                 | Comparison of efficacy and safety between electroacupuncture at ‘four sacral points’ and conventional electroacupuncture for the treatment of urinary incontinence after stroke: study protocol for a randomized controlled trial <sup>1</sup>                                                                                                                                                                                                                                                                                                                                                                                                                                                                                                                                                                                                                                                                                                                                                                                                                                                                                                                                                                                                                                                                                                                                                                                                                                                                        |                                               |                     |                                          |             |                               |  |                                           |                                                                    |                 |                                                                    |                      |  |                            |                                             |                                |                                                                                                                                         |              |                                                                                                   |                  |                                                                                                                                                                                                                                   |                          |       |                                           |                                                          |
| Trial registration                            | 2a                                                                                                                                                                                                                                | ChiCTR-IOR-17012847 <sup>2</sup>                                                                                                                                                                                                                                                                                                                                                                                                                                                                                                                                                                                                                                                                                                                                                                                                                                                                                                                                                                                                                                                                                                                                                                                                                                                                                                                                                                                                                                                                                      |                                               |                     |                                          |             |                               |  |                                           |                                                                    |                 |                                                                    |                      |  |                            |                                             |                                |                                                                                                                                         |              |                                                                                                   |                  |                                                                                                                                                                                                                                   |                          |       |                                           |                                                          |
|                                               | 2b                                                                                                                                                                                                                                | <table border="1"> <tr> <td>Primary registry and trial identifying number</td> <td>ChiCTR-IOR-17012847</td> </tr> <tr> <td>Date of registration in primary registry</td> <td>30 Sep 2017</td> </tr> <tr> <td>Secondary identifying numbers</td> <td></td> </tr> <tr> <td>Source(s) of monetary or material support</td> <td>Zhejiang Provincial Administration of Traditional Chinese Medicine</td> </tr> <tr> <td>Primary sponsor</td> <td>Zhejiang Provincial Administration of Traditional Chinese Medicine</td> </tr> <tr> <td>Secondary sponsor(s)</td> <td></td> </tr> <tr> <td>Contact for public queries</td> <td>CZ[zc985417@163.com],HFZ[zhuzhijie@163.com]</td> </tr> <tr> <td>Contact for scientific queries</td> <td>CZ,HFZ Department of Acupuncture and Moxibustion, the First Affiliated Hospital of Zhejiang Chinese Medical University, Hangzhou, China</td> </tr> <tr> <td>Public title</td> <td>Electroacupuncture at ‘four sacral points’ for the treatment of urinary incontinence after stroke</td> </tr> <tr> <td>Scientific title</td> <td>Comparison of efficacy and safety between electroacupuncture at ‘four sacral points’ and conventional electroacupuncture for the treatment of urinary incontinence after stroke: study protocol for a randomized controlled trial</td> </tr> <tr> <td>Countries of recruitment</td> <td>China</td> </tr> <tr> <td>Health condition(s) or problem(s) studied</td> <td>Acupuncture treatment; Urinary incontinence after stroke</td> </tr> </table> | Primary registry and trial identifying number | ChiCTR-IOR-17012847 | Date of registration in primary registry | 30 Sep 2017 | Secondary identifying numbers |  | Source(s) of monetary or material support | Zhejiang Provincial Administration of Traditional Chinese Medicine | Primary sponsor | Zhejiang Provincial Administration of Traditional Chinese Medicine | Secondary sponsor(s) |  | Contact for public queries | CZ[zc985417@163.com],HFZ[zhuzhijie@163.com] | Contact for scientific queries | CZ,HFZ Department of Acupuncture and Moxibustion, the First Affiliated Hospital of Zhejiang Chinese Medical University, Hangzhou, China | Public title | Electroacupuncture at ‘four sacral points’ for the treatment of urinary incontinence after stroke | Scientific title | Comparison of efficacy and safety between electroacupuncture at ‘four sacral points’ and conventional electroacupuncture for the treatment of urinary incontinence after stroke: study protocol for a randomized controlled trial | Countries of recruitment | China | Health condition(s) or problem(s) studied | Acupuncture treatment; Urinary incontinence after stroke |
| Primary registry and trial identifying number | ChiCTR-IOR-17012847                                                                                                                                                                                                               |                                                                                                                                                                                                                                                                                                                                                                                                                                                                                                                                                                                                                                                                                                                                                                                                                                                                                                                                                                                                                                                                                                                                                                                                                                                                                                                                                                                                                                                                                                                       |                                               |                     |                                          |             |                               |  |                                           |                                                                    |                 |                                                                    |                      |  |                            |                                             |                                |                                                                                                                                         |              |                                                                                                   |                  |                                                                                                                                                                                                                                   |                          |       |                                           |                                                          |
| Date of registration in primary registry      | 30 Sep 2017                                                                                                                                                                                                                       |                                                                                                                                                                                                                                                                                                                                                                                                                                                                                                                                                                                                                                                                                                                                                                                                                                                                                                                                                                                                                                                                                                                                                                                                                                                                                                                                                                                                                                                                                                                       |                                               |                     |                                          |             |                               |  |                                           |                                                                    |                 |                                                                    |                      |  |                            |                                             |                                |                                                                                                                                         |              |                                                                                                   |                  |                                                                                                                                                                                                                                   |                          |       |                                           |                                                          |
| Secondary identifying numbers                 |                                                                                                                                                                                                                                   |                                                                                                                                                                                                                                                                                                                                                                                                                                                                                                                                                                                                                                                                                                                                                                                                                                                                                                                                                                                                                                                                                                                                                                                                                                                                                                                                                                                                                                                                                                                       |                                               |                     |                                          |             |                               |  |                                           |                                                                    |                 |                                                                    |                      |  |                            |                                             |                                |                                                                                                                                         |              |                                                                                                   |                  |                                                                                                                                                                                                                                   |                          |       |                                           |                                                          |
| Source(s) of monetary or material support     | Zhejiang Provincial Administration of Traditional Chinese Medicine                                                                                                                                                                |                                                                                                                                                                                                                                                                                                                                                                                                                                                                                                                                                                                                                                                                                                                                                                                                                                                                                                                                                                                                                                                                                                                                                                                                                                                                                                                                                                                                                                                                                                                       |                                               |                     |                                          |             |                               |  |                                           |                                                                    |                 |                                                                    |                      |  |                            |                                             |                                |                                                                                                                                         |              |                                                                                                   |                  |                                                                                                                                                                                                                                   |                          |       |                                           |                                                          |
| Primary sponsor                               | Zhejiang Provincial Administration of Traditional Chinese Medicine                                                                                                                                                                |                                                                                                                                                                                                                                                                                                                                                                                                                                                                                                                                                                                                                                                                                                                                                                                                                                                                                                                                                                                                                                                                                                                                                                                                                                                                                                                                                                                                                                                                                                                       |                                               |                     |                                          |             |                               |  |                                           |                                                                    |                 |                                                                    |                      |  |                            |                                             |                                |                                                                                                                                         |              |                                                                                                   |                  |                                                                                                                                                                                                                                   |                          |       |                                           |                                                          |
| Secondary sponsor(s)                          |                                                                                                                                                                                                                                   |                                                                                                                                                                                                                                                                                                                                                                                                                                                                                                                                                                                                                                                                                                                                                                                                                                                                                                                                                                                                                                                                                                                                                                                                                                                                                                                                                                                                                                                                                                                       |                                               |                     |                                          |             |                               |  |                                           |                                                                    |                 |                                                                    |                      |  |                            |                                             |                                |                                                                                                                                         |              |                                                                                                   |                  |                                                                                                                                                                                                                                   |                          |       |                                           |                                                          |
| Contact for public queries                    | CZ[zc985417@163.com],HFZ[zhuzhijie@163.com]                                                                                                                                                                                       |                                                                                                                                                                                                                                                                                                                                                                                                                                                                                                                                                                                                                                                                                                                                                                                                                                                                                                                                                                                                                                                                                                                                                                                                                                                                                                                                                                                                                                                                                                                       |                                               |                     |                                          |             |                               |  |                                           |                                                                    |                 |                                                                    |                      |  |                            |                                             |                                |                                                                                                                                         |              |                                                                                                   |                  |                                                                                                                                                                                                                                   |                          |       |                                           |                                                          |
| Contact for scientific queries                | CZ,HFZ Department of Acupuncture and Moxibustion, the First Affiliated Hospital of Zhejiang Chinese Medical University, Hangzhou, China                                                                                           |                                                                                                                                                                                                                                                                                                                                                                                                                                                                                                                                                                                                                                                                                                                                                                                                                                                                                                                                                                                                                                                                                                                                                                                                                                                                                                                                                                                                                                                                                                                       |                                               |                     |                                          |             |                               |  |                                           |                                                                    |                 |                                                                    |                      |  |                            |                                             |                                |                                                                                                                                         |              |                                                                                                   |                  |                                                                                                                                                                                                                                   |                          |       |                                           |                                                          |
| Public title                                  | Electroacupuncture at ‘four sacral points’ for the treatment of urinary incontinence after stroke                                                                                                                                 |                                                                                                                                                                                                                                                                                                                                                                                                                                                                                                                                                                                                                                                                                                                                                                                                                                                                                                                                                                                                                                                                                                                                                                                                                                                                                                                                                                                                                                                                                                                       |                                               |                     |                                          |             |                               |  |                                           |                                                                    |                 |                                                                    |                      |  |                            |                                             |                                |                                                                                                                                         |              |                                                                                                   |                  |                                                                                                                                                                                                                                   |                          |       |                                           |                                                          |
| Scientific title                              | Comparison of efficacy and safety between electroacupuncture at ‘four sacral points’ and conventional electroacupuncture for the treatment of urinary incontinence after stroke: study protocol for a randomized controlled trial |                                                                                                                                                                                                                                                                                                                                                                                                                                                                                                                                                                                                                                                                                                                                                                                                                                                                                                                                                                                                                                                                                                                                                                                                                                                                                                                                                                                                                                                                                                                       |                                               |                     |                                          |             |                               |  |                                           |                                                                    |                 |                                                                    |                      |  |                            |                                             |                                |                                                                                                                                         |              |                                                                                                   |                  |                                                                                                                                                                                                                                   |                          |       |                                           |                                                          |
| Countries of recruitment                      | China                                                                                                                                                                                                                             |                                                                                                                                                                                                                                                                                                                                                                                                                                                                                                                                                                                                                                                                                                                                                                                                                                                                                                                                                                                                                                                                                                                                                                                                                                                                                                                                                                                                                                                                                                                       |                                               |                     |                                          |             |                               |  |                                           |                                                                    |                 |                                                                    |                      |  |                            |                                             |                                |                                                                                                                                         |              |                                                                                                   |                  |                                                                                                                                                                                                                                   |                          |       |                                           |                                                          |
| Health condition(s) or problem(s) studied     | Acupuncture treatment; Urinary incontinence after stroke                                                                                                                                                                          |                                                                                                                                                                                                                                                                                                                                                                                                                                                                                                                                                                                                                                                                                                                                                                                                                                                                                                                                                                                                                                                                                                                                                                                                                                                                                                                                                                                                                                                                                                                       |                                               |                     |                                          |             |                               |  |                                           |                                                                    |                 |                                                                    |                      |  |                            |                                             |                                |                                                                                                                                         |              |                                                                                                   |                  |                                                                                                                                                                                                                                   |                          |       |                                           |                                                          |

1  
2  
3  
4  
5  
6  
7  
8  
9  
10  
11  
12  
13  
14  
15  
16  
17  
18  
19  
20  
21  
22  
23  
24  
25  
26  
27  
28  
29  
30  
31  
32  
33  
34  
35  
36  
37  
38  
39  
40  
41  
42  
43  
44  
45  
46  
47

|                                      |                                                                                                                                                                                                                                                                                                                                                                                                                                                                                                                                                                                                                                                                                                                                                                                                                                                                                                                                                                                                                                                                                                                                                                                                           |
|--------------------------------------|-----------------------------------------------------------------------------------------------------------------------------------------------------------------------------------------------------------------------------------------------------------------------------------------------------------------------------------------------------------------------------------------------------------------------------------------------------------------------------------------------------------------------------------------------------------------------------------------------------------------------------------------------------------------------------------------------------------------------------------------------------------------------------------------------------------------------------------------------------------------------------------------------------------------------------------------------------------------------------------------------------------------------------------------------------------------------------------------------------------------------------------------------------------------------------------------------------------|
| Intervention(s)                      | Treatment group: electroacupuncture at ‘four sacral points’<br>Control group: conventional electroacupuncture                                                                                                                                                                                                                                                                                                                                                                                                                                                                                                                                                                                                                                                                                                                                                                                                                                                                                                                                                                                                                                                                                             |
| Key inclusion and exclusion criteria | <p>Ages eligible for study: 30-85 years old; Sexes eligible for study: both;<br/> Accepts healthy volunteers: no.</p> <p>Inclusion criteria:<br/> Male or female patients aged 30–85 years;<br/> Diagnosis of post-stroke UI in accordance with the criteria of the American Stroke Association and the International Continence Society;<br/> Inpatients or outpatients with a post-stroke interval of 4 weeks to 2 years;<br/> Stable vital signs, normal consciousness, and compliance with treatment;<br/> Refractoriness to medications (patients who have taken antimuscarinic agents with no UI improvement);<br/> Provision of written informed consent.</p> <p>Exclusion criteria: UI caused by other diseases such as Parkinson’s disease, multiple sclerosis, spinal injury, or Alzheimer’s disease; Pre-stroke UI, SUI or mixed UI, overflow incontinence;<br/> Urinary retention concomitant with UI;<br/> Urethral injury, lower urinary tract obstruction, acute urinary tract infection, refractory urinary tract infection, hydronephrosis, urological calculi, or tumours;<br/> Severe cognitive impairment, as defined by a Mini-Mental State Examination (MMSE) score of &lt;22 ;</p> |



|                               |                         |                                                                                                                                                                                                                                                                                                                                                                                                                                                                                                          |
|-------------------------------|-------------------------|----------------------------------------------------------------------------------------------------------------------------------------------------------------------------------------------------------------------------------------------------------------------------------------------------------------------------------------------------------------------------------------------------------------------------------------------------------------------------------------------------------|
|                               |                         | Insufficiency of the heart, lungs, liver, and/or kidneys; Presence of an implantable electronic device                                                                                                                                                                                                                                                                                                                                                                                                   |
|                               | Study type              | Interventional                                                                                                                                                                                                                                                                                                                                                                                                                                                                                           |
|                               |                         | Allocation: randomized; Intervention model: parallel assignment; Masking: blinded assessment and analysis.                                                                                                                                                                                                                                                                                                                                                                                               |
|                               |                         | Primary purpose: treatment                                                                                                                                                                                                                                                                                                                                                                                                                                                                               |
|                               | Date of first enrolment | Hasn't started                                                                                                                                                                                                                                                                                                                                                                                                                                                                                           |
|                               | Target sample size      | 140                                                                                                                                                                                                                                                                                                                                                                                                                                                                                                      |
|                               | Recruitment status      | Hasn't started                                                                                                                                                                                                                                                                                                                                                                                                                                                                                           |
|                               | Primary outcome(s)      | The incontinent episode diary                                                                                                                                                                                                                                                                                                                                                                                                                                                                            |
|                               | Key secondary outcomes  | International Consultation on Incontinence Questionnaire Urinary Incontinence – Short Form (ICIQ-UI SF); Barthel Activities of Daily Living Index (Barthel ADL Index)                                                                                                                                                                                                                                                                                                                                    |
| Protocol version              | 3                       | Issue date: 30 Sep 2017                                                                                                                                                                                                                                                                                                                                                                                                                                                                                  |
|                               |                         | Protocol amendment number: 01                                                                                                                                                                                                                                                                                                                                                                                                                                                                            |
|                               |                         | Authors: Chen Shan; Siyou Wang; Lihua Xuan, Hanti Lu, Zhikai Hu, Chao Zhang, Huifang Zhang <sup>1</sup>                                                                                                                                                                                                                                                                                                                                                                                                  |
| Funding                       | 4                       | This work has been supported Zhejiang Provincial Administration of Traditional Chinese Medicine (grant number 2016ZA076; 2018ZA045).                                                                                                                                                                                                                                                                                                                                                                     |
| Roles and responsibilities 5a |                         | SC[No. 9 the Ninth Street, Xiasha Economic and Technological Zone, Department of Acupuncture and Moxibustion, the First Affiliated Hospital of Zhejiang Chinese Medical University, Hangzhou, China]; SYW[No. 650 Wanpin Road, Clinical Research Section, Shanghai Research Institute of Acupuncture and Meridian, Shanghai, China]; LHX[No. 54 Youdian Road, Department of Acupuncture and Moxibustion, the First Affiliated Hospital of Zhejiang Chinese Medical University, Hangzhou, China]; HTL[No. |

54 Youdian Road, Clinical Evaluation and Analysis Center of the First Affiliated Hospital of Zhejiang Chinese Medical University, Hangzhou, China]; ZKH[No. 668 Jimei Avenue, Jimei District, Department of Computer Science, Huaqiao University, Xiamen, China]; CZ[No. 9 the Ninth Street, Xiasha Economic and Technological Zone, Rehabilitation Unit of the First Affiliated Hospital of Zhejiang Chinese Medical University, Hangzhou, China]; HFZ[No. 9 the Ninth Street, Xiasha Economic and Technological Zone, Department of Acupuncture and Moxibustion, the First Affiliated Hospital of Zhejiang Chinese Medical University, Hangzhou, China]

Contributors: SC conceived and wrote the protocol; SYW and LHX contributed to the study design; HTL contributed to the sample size calculation and wrote the statistical analysis plan; ZKH drew the flow charts; CZ and HFZ prepared the figures and tables. All authors have read and approved the final manuscript.<sup>17</sup>

5b Trial sponsor: Zhejiang Provincial Administration of Traditional Chinese Medicine<sup>18</sup>

Sponsor's Reference: grant number 2016ZA076;2018ZA045<sup>18</sup>

Contact name: Zhejiang Provincial Administration of Traditional Chinese Medicine

Address: No.216 Qingchun Road

Telephone: +86 0571 8770 9076

Email: zjtcn@zjwst.gov.cn

5c This funding source had no role in the design of this study and will not have any role during its execution, analyses, interpretation of the data, or decision to submit results.

5d Authors in the title page are members of the steering committee

## Introduction

Background and rationale 6a Introduction: In a systematic review, a random-effects meta-analysis determined the prevalence of UI after stroke to be 23.6%. Physical consequences include skin dermatitis and urinary tract infections, while psychological consequences include embarrassment and low self-esteem. In addition, UI is a powerful prognostic indicator of survival and eventual functional

1  
2  
3  
4  
5  
6  
7  
8  
9  
10  
11  
12  
13  
14  
15  
16  
17  
18  
19  
20  
21  
22  
23  
24  
25  
26  
27  
28  
29  
30  
31  
32  
33  
34  
35  
36  
37  
38  
39  
40  
41  
42  
43  
44  
45  
46  
47

---

dependence. The most recent research on this topic demonstrated a higher mortality rate for stroke patients with UI (56.8%) than for stroke patients without UI (11.9%). Therefore, the management of UI after stroke is of great importance. Post-stroke UI may develop because of various reasons, although direct stroke-induced damage to the neuromicturition pathways is considered the most common cause. Typical symptoms include the involuntary leakage of urine accompanied or immediately preceded by urgency. Urodynamic evaluation often reveals uninhibited detrusor contraction.

Evidence-based interventions for post-stroke UI include behavioural and pharmacological interventions, as well as individually tailored structured management plans, or the aid of continence nurse specialists, in order to promote continence. Trials of behavioural and pharmacological therapies have provided insufficient evidence to guide the management of post-stroke UI in adults. Furthermore, side effect profiles and anticholinergic burden should be considered before medications are prescribed. Neuromodulation therapies, which involve the electrical stimulation of target-specific nerves, are reportedly effective for overactive bladder (OAB) or urgency UI (UUI). Neuromodulation includes transvaginal or transanal electrical stimulation (TES), posterior tibial nerve stimulation (PTNS), sacral nerve neuromodulation (SNM), and pudendal nerve (PN) neuromodulation (PNM). Although TES is an easy procedure, it is not tolerated by many patients because of discomfort, mucosal injury and high intensity stimulation for an acceptable treatment result. PTNS is a minimally invasive technique with needle electrodes but it is not direct PN stimulation and requires multiple treatments to maintain initial effect comparing with SNM. SNM requires surgical procedure with implantation of InterStim device, providing continuous stimulation by close nerve contact. It has a high success rate. Its common adverse events are pain (15-42%) and infection (3.4-6.1%) at the implant site and surgical revision that can mount up to 33%. PN afferents play a particularly important role in the inhibition of the voiding reflex. PNM as direct PN stimulation may be more effective than SNM because the latter only excites a portion of PN afferents. UUI refractory to SNM can be treated by PNM with the Interstim device or the Bion device (selective PN stimulation); however, the performance of PNM also needs surgery so its disadvantages are similar to those of SNM.

On the basis of the theory of nerve stimulation, we developed electroacupuncture at 'four sacral points', also known as electroacupuncture neurostimulation therapy or electrical PN stimulation therapy. This approach involves the insertion of long

---

1  
2  
3  
4  
5  
6  
7  
8  
9  
10  
11  
12  
13  
14  
15  
16  
17  
18  
19  
20  
21  
22  
23  
24  
25  
26  
27  
28  
29  
30  
31  
32  
33  
34  
35  
36  
37  
38  
39  
40  
41  
42  
43  
44  
45  
46  
47

---

needles at ‘four sacral points,’ with electricity to stimulate specific nerves under the sacral region. In our previous study, this treatment has been used to treat stress UI (SUI) in women, and radiographic evidence with simultaneous records of perineal ultrasonographic pelvic floor muscle (PFM) contraction, vaginal pressure, and pelvic floor surface electromyography have shown that it causes PN excitation. It has also been used for the treatment of female urgency-frequency syndrome, idiopathic urgency UI, and UI caused by neurological or non-neurological conditions. High quality study on electroacupuncture at ‘four sacral points’ for post-stroke UI need to be conducted for a better management of UI after stroke.<sup>3-4</sup>

Treatment period: All participants will receive treatment every day from Monday to Friday. One course of treatment will comprise 10 sessions. The therapeutic effects will be evaluated after the completion of two treatment courses (4 weeks).<sup>9</sup>

---

6b The principle of acupuncture treatment for UI is to promote the recovery of urine control. Acupoints on the lower abdomen, such as CV4 (Guanyuan), CV6 (Qihai), and ST28 (Shuidao), as well as those on the sacral region, such as BL32 (Ciliao), BL33 (Zhongliao), and BL 35 (Huiyang), are generally selected for the regulation of the bladder voiding function. A literature review showed that acupuncture demonstrated more favourable effects than did antimuscarinic drugs for the treatment of OAB and alleviation of symptoms in some comparative trials.<sup>4</sup>

---

Objectives 7 Here we describe a protocol for an RCT to evaluate the efficacy and safety of electroacupuncture at ‘four sacral points’ for the management of post-stroke UI.<sup>5</sup>

---

Trial design 8 It is designed as a blinded randomized assessment and analysis with two parallel groups over a 4-week treatment period. Randomization will be performed in a random 1:1 allocation sequence.<sup>5</sup>

---

**Methods: Participants, interventions, and outcomes**

---

Study setting 9 Eligible participants will be recruited from the inpatient and outpatient departments of the First Affiliated Hospital of Zhejiang Chinese Medical University <sup>5</sup>

---

Eligibility criteria 10 Inclusion Criteria  
1. Male or female patients aged 30–85 years

---

2. Diagnosis of post-stroke UI in accordance with the criteria of the American Stroke Association and the International Continence Society

3. Inpatients or outpatients with a post-stroke interval of 4 weeks to 2 years

4. Stable vital signs, normal consciousness, and compliance with treatment

5. Refractoriness to medications( patients who have taken antimuscarinic agents with no UI improvement)

6. Provision of written informed consent

#### Exclusion Criteria

1. UI caused by other diseases such as Parkinson's disease, multiple sclerosis, spinal injury, or Alzheimer's disease

2. Pre-stroke UI, SUI or mixed UI, or overflow incontinence.

3. Urinary retention concomitant with UI

4. Urethral injury, lower urinary tract obstruction, acute urinary tract infection, refractory urinary tract infection, hydronephrosis, urological calculi, or tumours

5. Severe cognitive impairment, as defined by a Mini-Mental State Examination (MMSE) score of <22

6. Insufficiency of the heart, lungs, liver, and/or kidneys

7. Presence of an implantable electronic device<sup>6-7</sup>

#### Eligibility criteria for acupuncturists and training

All of the study-related treatments will be provided by certified and skilled acupuncturists who will strictly follow the detailed procedures for each group.<sup>7</sup>

|               |     |                                                                                                                                                                                                                                                                                                                                                                                                                                                                                                                       |
|---------------|-----|-----------------------------------------------------------------------------------------------------------------------------------------------------------------------------------------------------------------------------------------------------------------------------------------------------------------------------------------------------------------------------------------------------------------------------------------------------------------------------------------------------------------------|
| Interventions | 11a | <p>Treatment group: Participants in this group will receive electroacupuncture at 'four sacral points'.</p> <p>a. Selection of points: Four sacral points (Figure 2 and Figure 3) are selected. The two upper points are located on either side of the sacrococcygeal joint, approximately 1 cm from the joint. The two lower points are located on either side of the tip of the coccyx, approximately 1 cm from the coccyx. Acupuncture will be performed at LI15 (Jianyu), LI11 (Quchi), LI10 (Shousanli), SJ5</p> |
|---------------|-----|-----------------------------------------------------------------------------------------------------------------------------------------------------------------------------------------------------------------------------------------------------------------------------------------------------------------------------------------------------------------------------------------------------------------------------------------------------------------------------------------------------------------------|

---

(Waiguan), and LI4 (Hegu) for participants with upper limb paralysis. For participants with lower limb paralysis, ST31 (Biguan), ST34 (Liangqiu), SP10 (Xuehai), SP9 (Yinlingquan), GB39 (Xuanzhong), GB40 (Qiuxu), and LR3 (Taichong) will also be used. GB20 (Fengchi), SJ17 (Yifeng), and GB12 (Wangu) will be used for participants with dysphagia, with the additional use of ST4 (Dicang), ST6 (Jiache), and LI20 (Yingxiang) for participants with facial paralysis and drooling.

b. Detailed procedure: At the upper sacral points, a needle (Suzhou Shenlong Medical Apparatus Factory, Suzhou, China) measuring  $0.40 \times 100$  mm will be inserted perpendicularly to a depth of 80–90 mm to induce a sensation referred to the urethra or anus via stimulation of the main trunk of the PN. At the lower sacral points, a needle measuring  $0.40 \times 100$  or  $0.40 \times 125$  mm will be inserted obliquely toward the ischiorectal fossa to a depth of 90–110 mm to induce a sensation referred to the urethra via stimulation of the perineal nerve (Figure 4). Once the sensation is induced in the respective regions, two pairs of electrodes from the G6805-A electroacupuncture device (Shantou Medical equipment factory, Shantou, China) will be connected to the two ipsilaterally inserted needles, with the anode connected to the upper needle and the cathode connected to the lower needle. The device will be set to produce electrical stimulation (biphasic 2-ms pulse duration) at a frequency of 2.0 Hz and a moderate intensity of 25–35 mA. Electrostimulation will be performed for 20 min during each treatment. PFM contraction around the urethra (often comfortable) must be maintained during the entire electrostimulation procedure. Conventional acupuncture without electricity will be applied for 20 min at the remaining acupoints.

Control group: Participants in this group will receive conventional electroacupuncture.

a. Selection of points: Abdominal points CV6 (Qihai), CV4 (Guanyuan), and ST28 (Shuidao, both sides), corresponding to the conventional electroacupuncture treatment of UI. The point selection procedure for participants with upper or lower limb paralysis, facial paralysis, and/or dysphagia will be the same as that used for the treatment group.

b. Detailed procedure: At CV6 (Qihai), CV4 (Guanyuan), and ST28 (Shuidao), a needle measuring  $0.25 \times 40$  mm will be inserted perpendicularly to a depth of 25–40 mm to induce a local sensation (distention or sourness). Subsequently, the electrodes from the G6805-A electroacupuncture device will be connected to the needles at these points with the anode connected to ST28 and the cathode connected to CV6 and CV4. The device will be set to produce electrical stimulation (biphasic 2-ms pulse duration) at a

---

|          |     |                                                                                                                                                                                                                                                                                                                                                                                                                                                                                                                                                                                                                                                                      |
|----------|-----|----------------------------------------------------------------------------------------------------------------------------------------------------------------------------------------------------------------------------------------------------------------------------------------------------------------------------------------------------------------------------------------------------------------------------------------------------------------------------------------------------------------------------------------------------------------------------------------------------------------------------------------------------------------------|
|          |     | <p>frequency of 2.0 Hz and a moderate intensity that is tolerable by the participants. Electrostimulation will be performed for 20 min during each treatment. Conventional acupuncture without electricity will be applied for 20 min at the remaining acupoints.</p> <p>Treatment period: All participants will receive treatment every day from Monday to Friday. One course of treatment will comprise 10 sessions. The therapeutic effects will be evaluated after the completion of two treatment courses (4 weeks).<sup>8-9</sup></p>                                                                                                                          |
|          | 11b | <p>Elimination criteria</p> <ol style="list-style-type: none"> <li>1. Inclusion despite non-fulfilment of the inclusion criteria</li> <li>2. Lack of exclusion despite fulfilment of the exclusion criteria</li> <li>3. Eligible participants who receive no interventions</li> </ol> <p>Dropout criteria</p> <ol style="list-style-type: none"> <li>1. Poor participant compliance (lack of adherence to treatment for personal reasons)</li> <li>2. Serious adverse events (SAE), complications, or special physiological changes necessitating discontinuation of the intervention</li> <li>3. Voluntary dropout<sup>7</sup></li> </ol>                           |
|          | 11c | <p>In order to improve adherence, health education about the importance of UI management will be conducted by a special nurse and brochures on post-stroke UI will be provided to patients.<sup>17</sup></p>                                                                                                                                                                                                                                                                                                                                                                                                                                                         |
|          | 11d | <p>All participants will receive routine medical care for stroke recovery, including the control of blood pressure, blood sugar, and blood lipids and routine rehabilitation training.</p> <p>During the treatment course and 24-week follow-up time, the administration of antimuscarinic agents and other drugs for neurogenic detrusor overactivity is prohibited for all the patients. They are also not permitted to receive other acupuncture treatment or physiotherapy for UI. All of the study-related treatments will be provided by certified and skilled acupuncturists who will strictly follow the detailed procedures for each group.<sup>7</sup></p> |
| Outcomes | 12  | <p>Primary outcome measures</p> <p>The incontinent episode diary</p> <p>The incontinent episode diary (Table 1) will be used to derive the primary outcome measure. The number of incontinent episodes</p>                                                                                                                                                                                                                                                                                                                                                                                                                                                           |

---

will be recorded by the participants over a period of 3 days at baseline. A template will be provided for patient use. This data will be recorded again at the end of treatment.

Secondary outcome measures

1. International Consultation on Incontinence Questionnaire Urinary Incontinence – Short Form (ICIQ-UI SF) (Table 2)

2. Barthel Activities of Daily Living Index (Barthel ADL Index) (Table 3)

The ICIQ-UI SF is used in research and clinical practice worldwide. It is a brief and psychometrically robust patient-completed questionnaire for evaluating the frequency and severity of UI in men and women and its impact on quality of life (QoL). The ICIQ-UI SF score ranges from 0 to 21. The Barthel ADL Index is a 10-item measure of activities of daily living (ADL) that is frequently used in clinical practice and as a trial outcome measure in stroke medicine. It is used to assess baseline abilities to quantify functional changes, including UI, after rehabilitation in stroke patients.

The above outcome measures will be assessed at baseline and at 4 and 28 weeks after baseline.<sup>9-10</sup>

---

|                      |    |                                                                                                                                                                                                                                                                                                                                                                                                                                                                                                                                                                                                                                                                                                                                    |
|----------------------|----|------------------------------------------------------------------------------------------------------------------------------------------------------------------------------------------------------------------------------------------------------------------------------------------------------------------------------------------------------------------------------------------------------------------------------------------------------------------------------------------------------------------------------------------------------------------------------------------------------------------------------------------------------------------------------------------------------------------------------------|
| Participant timeline | 13 | A total of 140 eligible participants will be recruited from the inpatient and outpatient departments of the First Affiliated Hospital of Zhejiang Chinese Medical University according to the inclusion and exclusion criteria. At the beginning of recruitment, detailed information about the study, including the research objective, study procedure, and potential benefits and risks, will be provided to all eligible patients. If the patient agrees to participate, he or she will be asked to sign a written informed consent form. This will be followed by baseline assessment and randomization. A treatment period of 4 weeks and a follow-up period of 24 weeks will follow the recruitment procedure. <sup>5</sup> |
|----------------------|----|------------------------------------------------------------------------------------------------------------------------------------------------------------------------------------------------------------------------------------------------------------------------------------------------------------------------------------------------------------------------------------------------------------------------------------------------------------------------------------------------------------------------------------------------------------------------------------------------------------------------------------------------------------------------------------------------------------------------------------|

Figure1

---



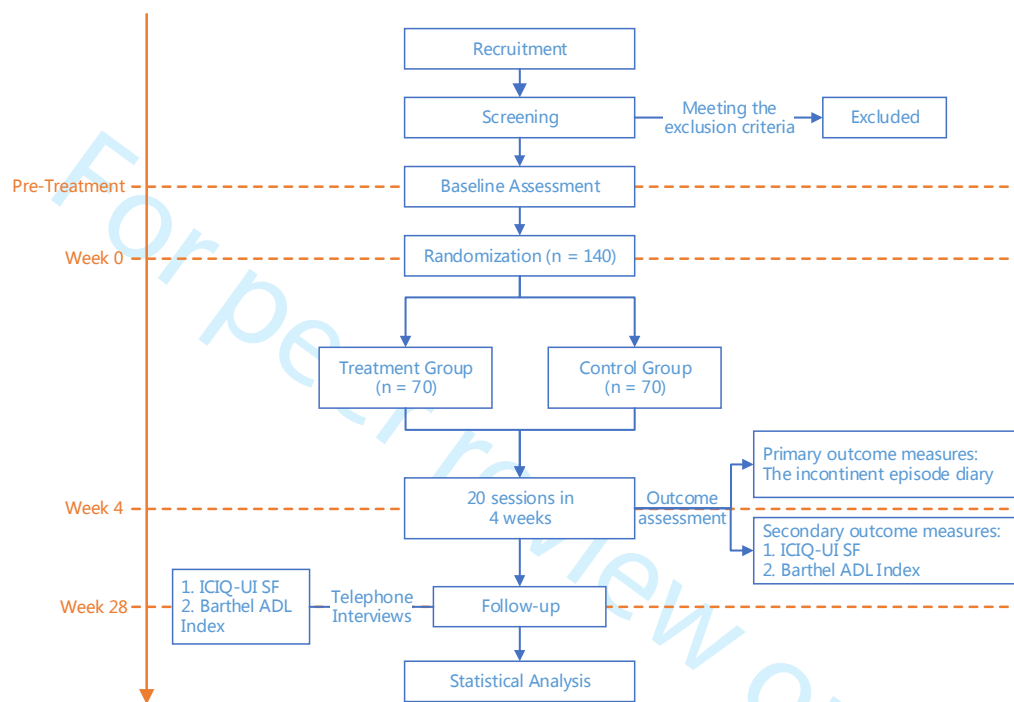

|             |    |                                                                                                                                                                                                                                                                                                                                                                               |
|-------------|----|-------------------------------------------------------------------------------------------------------------------------------------------------------------------------------------------------------------------------------------------------------------------------------------------------------------------------------------------------------------------------------|
| Sample size | 14 | With reference to a similar study with 120 women (efficacy rate, 70.1%:45%), the sample size has been calculated, using PASS 11 software, as 120 patients for a power (1-beta) of 0.80, an alpha (significance level) of 0.05, and a ratio of 1:1. With consideration of the estimated dropout rate (15%), the total sample size will be 140 (70 in each group). <sup>6</sup> |
| Recruitment | 15 | The neurology department of the First Affiliated Hospital of Zhejiang Chinese Medical University has the major source of patients with post-stroke UI. Our reach team includes neurological physicians and special nurses who will interview potentially eligible                                                                                                             |

patients. Advertisements will be released through health education brochures, posters, and videos displayed in the outpatient and inpatient sites of the First Affiliated Hospital of Zhejiang Chinese Medical University. Recruitment information will also be issued through media (e.g. newspapers, broadcasts, and websites)<sup>5</sup>

---

## Methods: Assignment of interventions

---

### Administrative Information

---

#### Allocation:

---

|                     |     |                                                                                                                                                                                                                                                                                               |
|---------------------|-----|-----------------------------------------------------------------------------------------------------------------------------------------------------------------------------------------------------------------------------------------------------------------------------------------------|
| Sequence generation | 16a | The randomization scheme has been created by the Clinical Evaluation and Analysis Center of the First Affiliated Hospital of Zhejiang Chinese Medical University, where professionals used SPSS Statistics 22.0 to generate a random 1:1 allocation sequence using a computer. <sup>5-6</sup> |
|---------------------|-----|-----------------------------------------------------------------------------------------------------------------------------------------------------------------------------------------------------------------------------------------------------------------------------------------------|

|                                  |     |                                                                                                                                                                                                                                                                                                                                                                                       |
|----------------------------------|-----|---------------------------------------------------------------------------------------------------------------------------------------------------------------------------------------------------------------------------------------------------------------------------------------------------------------------------------------------------------------------------------------|
| Allocation concealment mechanism | 16b | Professionals involved in allocation will not be recruited in the study. The random allocation is strictly kept in an opaque envelope and is inaccessible to other research staff. After baseline assessment, the envelope will be opened by an independent staff member in the participant's presence, in order to determine the group assignment for that participant. <sup>6</sup> |
|----------------------------------|-----|---------------------------------------------------------------------------------------------------------------------------------------------------------------------------------------------------------------------------------------------------------------------------------------------------------------------------------------------------------------------------------------|

|                |     |                                                                                                                                                                                                                                                                                                                                                                                                                                                                                                                                                                                                                                                                             |
|----------------|-----|-----------------------------------------------------------------------------------------------------------------------------------------------------------------------------------------------------------------------------------------------------------------------------------------------------------------------------------------------------------------------------------------------------------------------------------------------------------------------------------------------------------------------------------------------------------------------------------------------------------------------------------------------------------------------------|
| Implementation | 16c | All patients who give consent for participation and who fulfil the inclusion criteria will be assigned to a group randomly. Randomisation will be requested by the staff member responsible for recruitment and clinical interviews from the First Affiliated Hospital of Zhejiang Chinese Medical University. An independent staff member will open an envelope with printed randomisation numbers in the participant's presence. The therapists will be informed about the participant's allocation at the same time. The staff member responsible for recruitment and clinical interviews is not allowed to receive information about the group allocation. <sup>6</sup> |
|----------------|-----|-----------------------------------------------------------------------------------------------------------------------------------------------------------------------------------------------------------------------------------------------------------------------------------------------------------------------------------------------------------------------------------------------------------------------------------------------------------------------------------------------------------------------------------------------------------------------------------------------------------------------------------------------------------------------------|

|          |     |                                                                                                                                                                                                                                                                                                                                                                                                                                                                                                                                              |
|----------|-----|----------------------------------------------------------------------------------------------------------------------------------------------------------------------------------------------------------------------------------------------------------------------------------------------------------------------------------------------------------------------------------------------------------------------------------------------------------------------------------------------------------------------------------------------|
| Blinding | 17a | Considering the nature of acupuncture, therapists and participants cannot be blinded to the treatment allocation. Data managers and statisticians will be blinded throughout the trial. Telephone interviewers who collect follow-up information will also be blinded. Data managers, statisticians, and telephone interviewers are restricted from discussing the treatment allocations with each other. The therapists will not be permitted to communicate with any data managers, statisticians, or telephone interviewers. <sup>6</sup> |
|----------|-----|----------------------------------------------------------------------------------------------------------------------------------------------------------------------------------------------------------------------------------------------------------------------------------------------------------------------------------------------------------------------------------------------------------------------------------------------------------------------------------------------------------------------------------------------|

|  |     |                                                                                                                                       |
|--|-----|---------------------------------------------------------------------------------------------------------------------------------------|
|  | 17b | If an unblinding event occurs among data managers, statisticians, or telephone interviewers, the relevant work will be transferred to |
|--|-----|---------------------------------------------------------------------------------------------------------------------------------------|

---

other appropriately blinded data managers, statisticians, or telephone interviewers. The Investigator must report all code breaks (with reason) as they occur on the corresponding CRF page.<sup>6</sup>

---

### Methods: Data collection, management and analysis

---

|                        |     |                                                                                                                                                                                                                                                                                                                                                                                                                                                                                                                                                                                                                                                                                                                                                                                                                                                                                                                                                                                                                                                                            |
|------------------------|-----|----------------------------------------------------------------------------------------------------------------------------------------------------------------------------------------------------------------------------------------------------------------------------------------------------------------------------------------------------------------------------------------------------------------------------------------------------------------------------------------------------------------------------------------------------------------------------------------------------------------------------------------------------------------------------------------------------------------------------------------------------------------------------------------------------------------------------------------------------------------------------------------------------------------------------------------------------------------------------------------------------------------------------------------------------------------------------|
| Data collection method | 18a | A research assistant will record the baseline characteristics of all participants. Trained caregivers will record the frequency of UI at baseline and at 4 weeks after baseline. A researcher who remains blinded to treatment group allocation will collect data regarding the frequency of UI and the weight of pads from the caregivers. The participants will also complete ICIQ-UI SF and the Barthel ADL Index at baseline and at 4 weeks after baseline. A blinded telephone interviewer will interview the participants and collect data pertaining to ICIQ-UI SF and the Barthel ADL Index at 28 weeks after baseline. All data will be recorded on the CRFs. After the completion of the CRFs, two independent researchers blinded to the group allocation will separately input data into an Excel spreadsheet. Another independent supervisor will check the two datasets for consistency. If conflicting data entries are discovered, the supervisor will compare the datasets with the original CRFs and mark the modification on the CRFs. <sup>14-15</sup> |
|                        | 18b | For participants who discontinue treatment early, we will use last observation carried forward analysis to handle the missing data, which means we will input outcome data of patients who lost follow-up to our analysis. <sup>15</sup>                                                                                                                                                                                                                                                                                                                                                                                                                                                                                                                                                                                                                                                                                                                                                                                                                                   |
| Data management        | 19  | The principal investigator of the research team will have the access to all documents and will protect the electronic documents with a password and create backups of all documents. The First Affiliated Hospital of Zhejiang Chinese Medical University will be responsible for the storage and management of all data. <sup>15</sup>                                                                                                                                                                                                                                                                                                                                                                                                                                                                                                                                                                                                                                                                                                                                    |
| Statistical methods    | 20a | All statistical analyses will be performed by a statistician from the Clinical Evaluation and Analysis Center of The First Affiliated Hospital of Zhejiang Chinese Medical University using SPSS Statistics 22.0. A normality test will be used to determine whether the data are normally distributed. Continuous variables with a normal distribution will be expressed as means $\pm$ standard deviations (SDs). Continuous variables with a non-normal distribution or ordinal variables will be expressed as medians (with lower, upper quartiles). Categorical variables will be summarized as counts and proportions. A Student's t-test will be used if the primary and secondary outcome measures conform to normal distribution. A paired t-test will be used to compare pre-treatment and                                                                                                                                                                                                                                                                       |

1  
2  
3  
4  
5  
6  
7  
8  
9  
10  
11  
12  
13  
14  
15  
16  
17  
18  
19  
20  
21  
22  
23  
24  
25  
26  
27  
28  
29  
30  
31  
32  
33  
34  
35  
36  
37  
38  
39  
40  
41  
42  
43  
44  
45  
46  
47

---

post-treatment UI occurrence for the primary outcome measure and pre-treatment and post-treatment scores in the secondary outcome measures. The independent sample t-test will be used to compare the difference between two groups for primary and secondary outcome measures. A Wilcoxon signed rank test will be used if the primary and secondary outcome measures conform to abnormal distribution. A Wilcoxon paired test will be used to compare pre-treatment and post-treatment UI occurrence for the primary outcome measure and pre-treatment and post-treatment scores in secondary outcome measures. The inter-group rank sum test will be used to compare the difference between two groups for primary and secondary outcome measures. All reported P-values will be two-sided, and confidence intervals (CI) will be at the 95% level. A P-value of <0.05 will be considered statistically significant.<sup>15-16</sup>

---

20b ANCOVA (analysis of covariance) will be used if there is imbalance in the baseline characteristics and outcome measures.<sup>15</sup>

---

20c For participants who discontinue treatment early, we will use last observation carried forward analysis to handle the missing data, meaning that we will input outcome data of patients who are lost to follow-up in our analysis.<sup>15</sup>

---

#### Methods: Monitoring

---

Data monitoring 21a An independent data monitoring committee (DMC) is made up of members from Clinical Evaluation and Analysis Center of The First Affiliated Hospital of Zhejiang Chinese Medical University. The DMC, blinded to the treatment allocations, will meet regularly to monitor the study data.<sup>15</sup>

---

21b The DMC will also perform interim-analysis when 50% of patients have been randomised and have completed the primary outcome measurement.<sup>15</sup>

---

Harms 22 Adverse events (AEs)

An adverse event of acupuncture is defined as symptoms or diseases that are against the purpose of the treatment during or following the acupuncture treatment. The research staff will record the blood pressure, heart rate, heart rhythm, and respiration rate and observe changes in the consciousness of all participants before and after the treatment. The description of AEs, time of occurrence, location of the reaction, level of severity, corresponding management, and the necessity for patient withdrawal from the

---

trial will be recorded on the Case Report Forms (CRFs). AEs of acupuncture will be classified according to their location as local and systemic reactions.

Local reactions:

Subcutaneous haematoma

Minor bleeding on withdrawal of the needle

Subcutaneous bruise

Pain in the punctured region after treatment

Skin allergy in the punctured region after treatment

Local infection

Systemic reactions:

Acupuncture fainting

Abdominal distention

Dizziness or vertigo

Leg weakness

Muscle spasm

Systemic allergy

Systemic infection

Organ injury

Severe AEs are defined as symptoms or diseases that result in hospitalization or prolong hospitalization, disability, a life-threatening situation, or even death. Systemic infection and organ injury are two major AEs. Severe AEs will be reported to the Ethics Committee within 24 h. The Ethics Committee will provide medical suggestions for the research team and decide whether the patient should continue the ongoing treatment.<sup>14</sup>

---

|          |    |                                                                                                                                                                |
|----------|----|----------------------------------------------------------------------------------------------------------------------------------------------------------------|
| Auditing | 23 | The First Affiliated Hospital of Zhejiang Chinese Medical University will audit this study mainly for participant enrolment, consent, and costs. <sup>15</sup> |
|----------|----|----------------------------------------------------------------------------------------------------------------------------------------------------------------|

---

### **Ethics and dissemination**

|                          |    |                          |
|--------------------------|----|--------------------------|
| Research ethics approval | 24 | Research ethics approval |
|--------------------------|----|--------------------------|

---

|                               |     |                                                                                                                                                                                                                                                                                                                                                                                              |
|-------------------------------|-----|----------------------------------------------------------------------------------------------------------------------------------------------------------------------------------------------------------------------------------------------------------------------------------------------------------------------------------------------------------------------------------------------|
|                               |     | The Ethics Committee of the First Affiliated Hospital of Zhejiang Chinese Medical University has reviewed and approved this protocol (approval No. 2018-K-059-01). This study will adhere to the principles of the Declaration of Helsinki. <sup>16</sup>                                                                                                                                    |
| Protocol amendments           | 25  | Modification of the protocol<br>Any modifications to the protocol, including changes of study objectives, study design, patient population, sample sizes, study procedures, or significant administrative aspects, will require a formal application to the Zhejiang Provincial Administration of Traditional Chinese Medicine as well as the Chinese clinical trial registry. <sup>16</sup> |
| Consent or assent             | 26a | At the beginning of recruitment, detailed information about the study, including the research objective, study procedure, and potential benefits and risks, will be provided to all eligible patients. If the patient agrees to participate, he or she will be asked to sign a written informed consent form. <sup>5</sup>                                                                   |
|                               | 26b | There are no additional consent provisions for collection and use of participant data and biological specimens in ancillary studies.                                                                                                                                                                                                                                                         |
| Confidentiality               | 27  | All study participants will be given an identification number throughout the trial to assure confidentiality. All participant information will be stored in locked cabinets with limited access. <sup>16</sup>                                                                                                                                                                               |
| Declaration of interests      | 28  | None.                                                                                                                                                                                                                                                                                                                                                                                        |
| Access to data                | 29  | The principal investigator of the research team will have the access to all documents. <sup>15</sup>                                                                                                                                                                                                                                                                                         |
| Ancillary and post-trial care | 30  | For patients having common adverse reactions, appropriate medical care will be given to ease local bleeding, irritation, bruising, and so on. For those who have severe reactions leading to organ injury, systematic infection, systematic allergy, and so on, compensation will be given to cover their medical costs by our research team. <sup>14</sup>                                  |
| Dissemination policy          | 31a | The results of this study will be published in open-access and peer-reviewed journals and presented at relevant conferences. <sup>16</sup>                                                                                                                                                                                                                                                   |
|                               | 31b | SC conceived and wrote the protocol; SYW and LHX contributed to the study design; HTL contributed to the sample size calculation and wrote the statistical analysis plan; ZKH drew the flow charts; CZ and HFZ prepared the figures and tables. All authors have read and approved the final manuscript. <sup>17</sup>                                                                       |
|                               | 31c | The initial data will be accessible via Research Manager (ResMan). <sup>16</sup>                                                                                                                                                                                                                                                                                                             |

---

**Appendices**

---

|                            |    |                                                                                                                                                  |
|----------------------------|----|--------------------------------------------------------------------------------------------------------------------------------------------------|
| Informed consent materials | 32 | A model consent form have been made and provided to the Ethics Committee of the First Affiliated Hospital of Zhejiang Chinese Medical University |
| Biological specimens       | 33 | We don't have biological specimens to collect.                                                                                                   |

---

For peer review only
